# Supplementary material
Source: MDPI journal article supplement (https://www.mdpi.com/2073-4344/10/5/474)

# Supporting information for

## Synthesis and investigation of pinane-based chiral tridentate ligands in the asymmetric addition of diethylzinc to aldehydes

Mounir Raji <sup>1</sup>, Tam Minh Le <sup>1,2</sup>, Ferenc Fülöp <sup>1,2</sup> and Zsolt Szakonyi <sup>1,3,\*</sup>

<sup>1</sup> Institute of Pharmaceutical Chemistry, University of Szeged, Interdisciplinary excellent center, H-6720 Szeged, Eötvös utca 6, Hungary; raji.mounir@pharm.u-szeged.hu (M.R); leminhtam@pharm.u-szeged.hu (T.M.L.)

<sup>2</sup> MTA-SZTE Stereochemistry Research Group, Hungarian Academy of Sciences, H-6720 Szeged, Eötvös utca 6, Hungary

<sup>3</sup> Interdisciplinary Centre of Natural Products, University of Szeged, H-6720 Szeged, Eötvös utca 6, Hungary

\* Correspondence: szakonyi@pharm.u-szeged.hu; Tel.: +36-62-546809; Fax: +36-62-545705

## Contents

|                                                                                    |          |
|------------------------------------------------------------------------------------|----------|
| $^1\text{H}$ , $^{13}\text{C}$ , HSQC, HMBC and NOESY NMR spectra of new compounds | S3 – S83 |
|------------------------------------------------------------------------------------|----------|

<sup>1</sup>H-NMR for compound **4a**

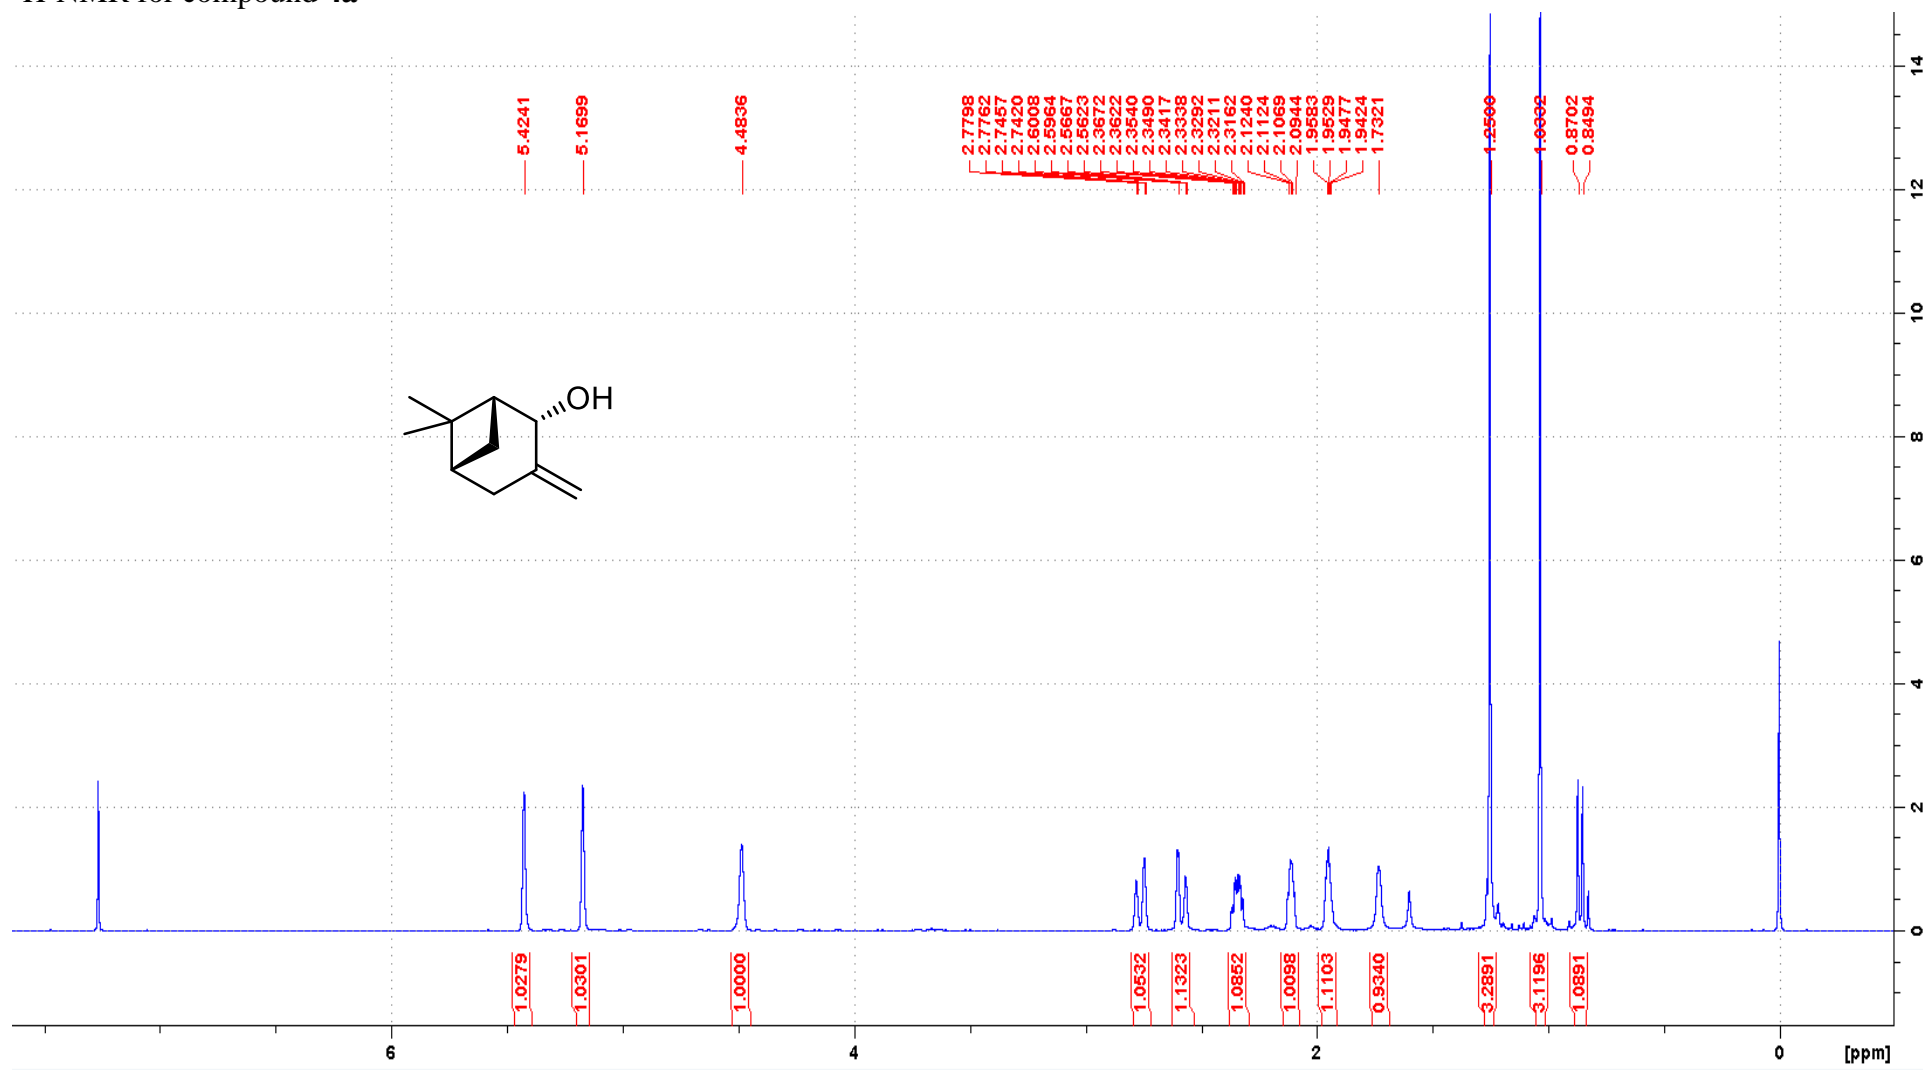

$^{13}\text{C}$ -NMR for compound **4a**

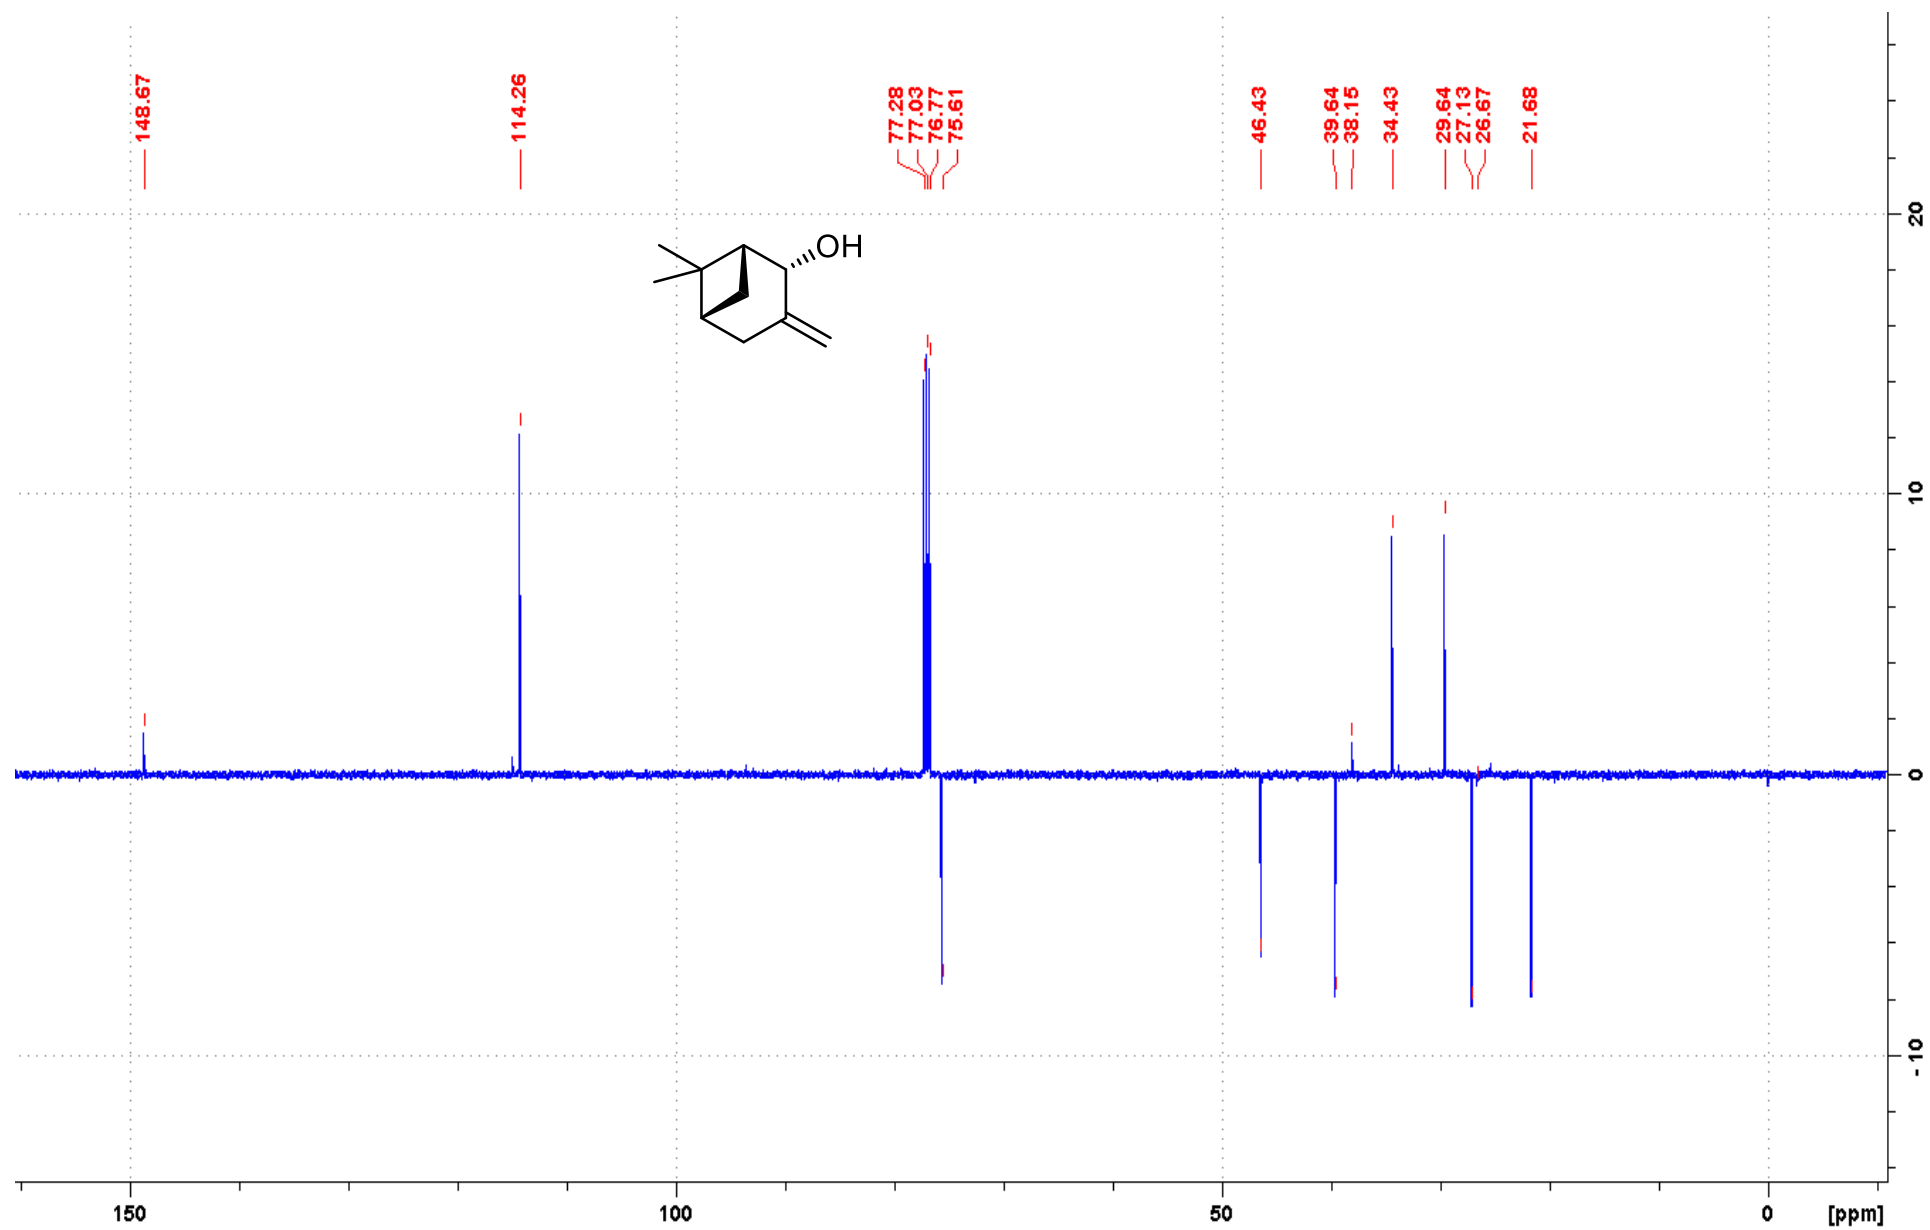

HSQC for compound **4a**

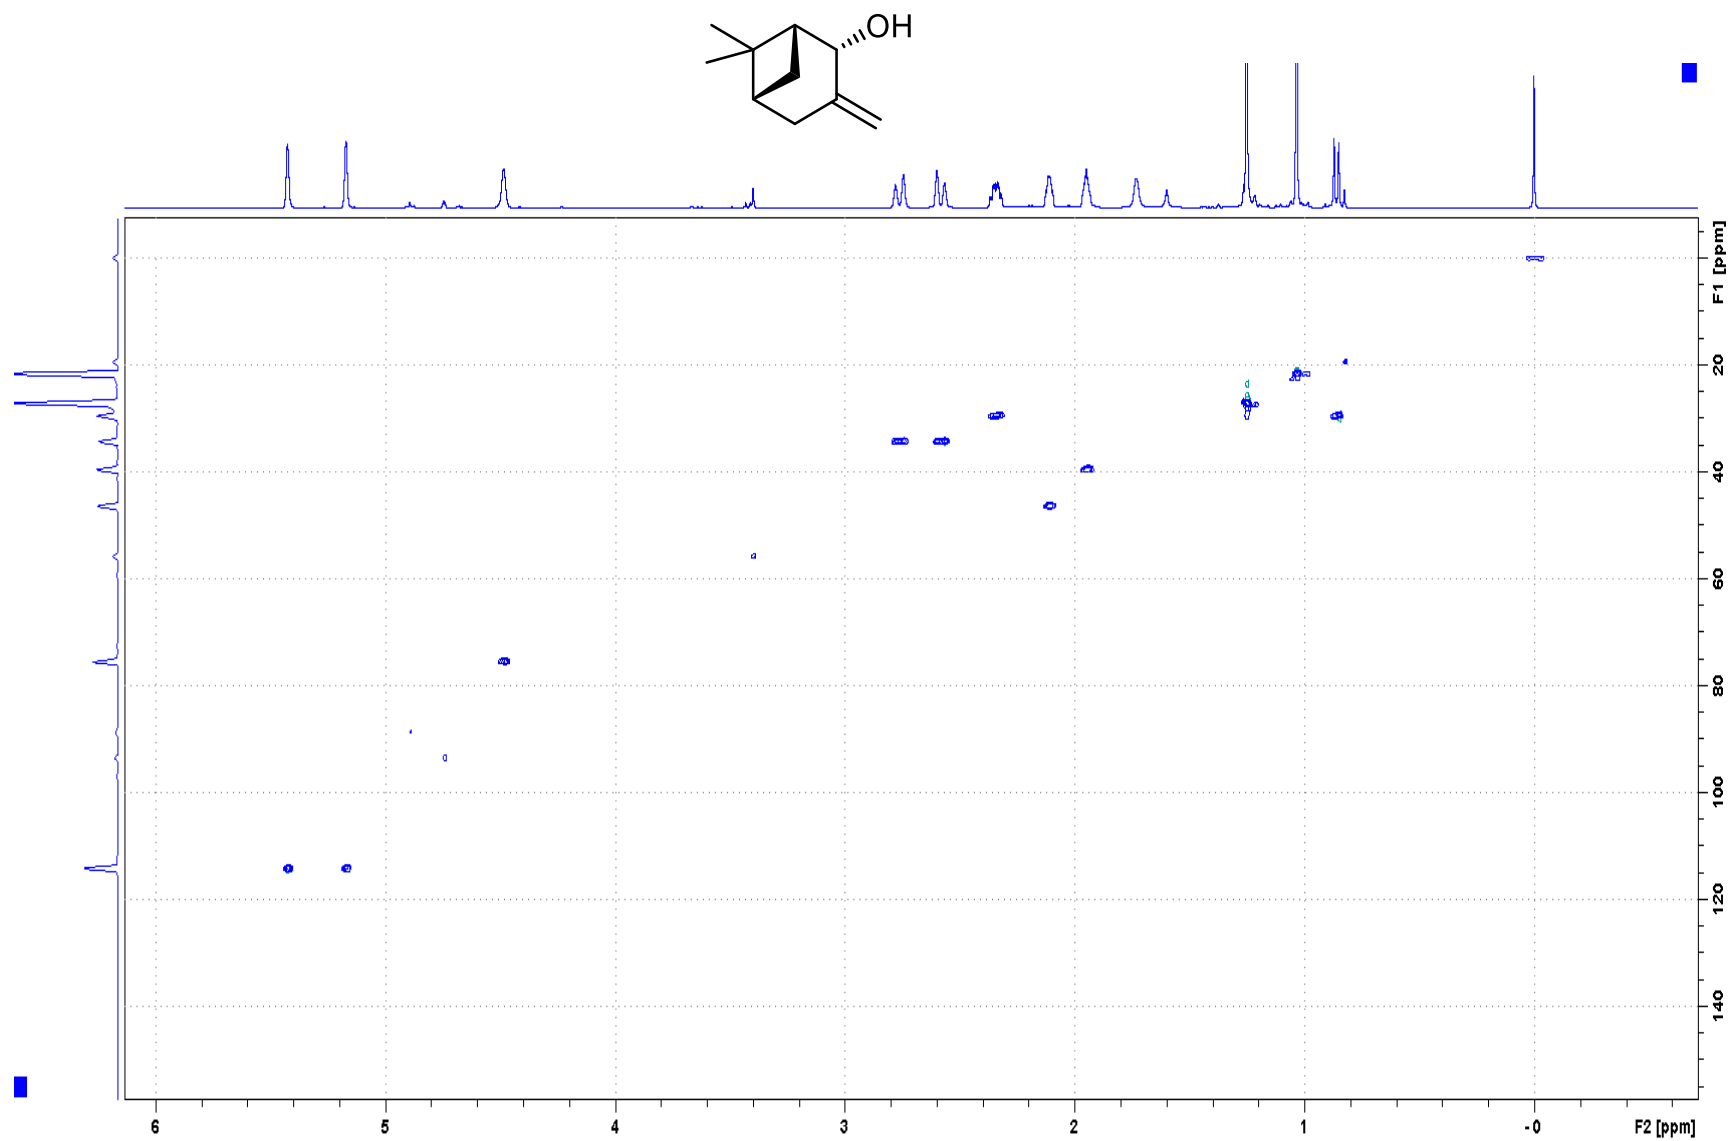

HMBC for compound **4a**

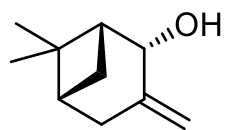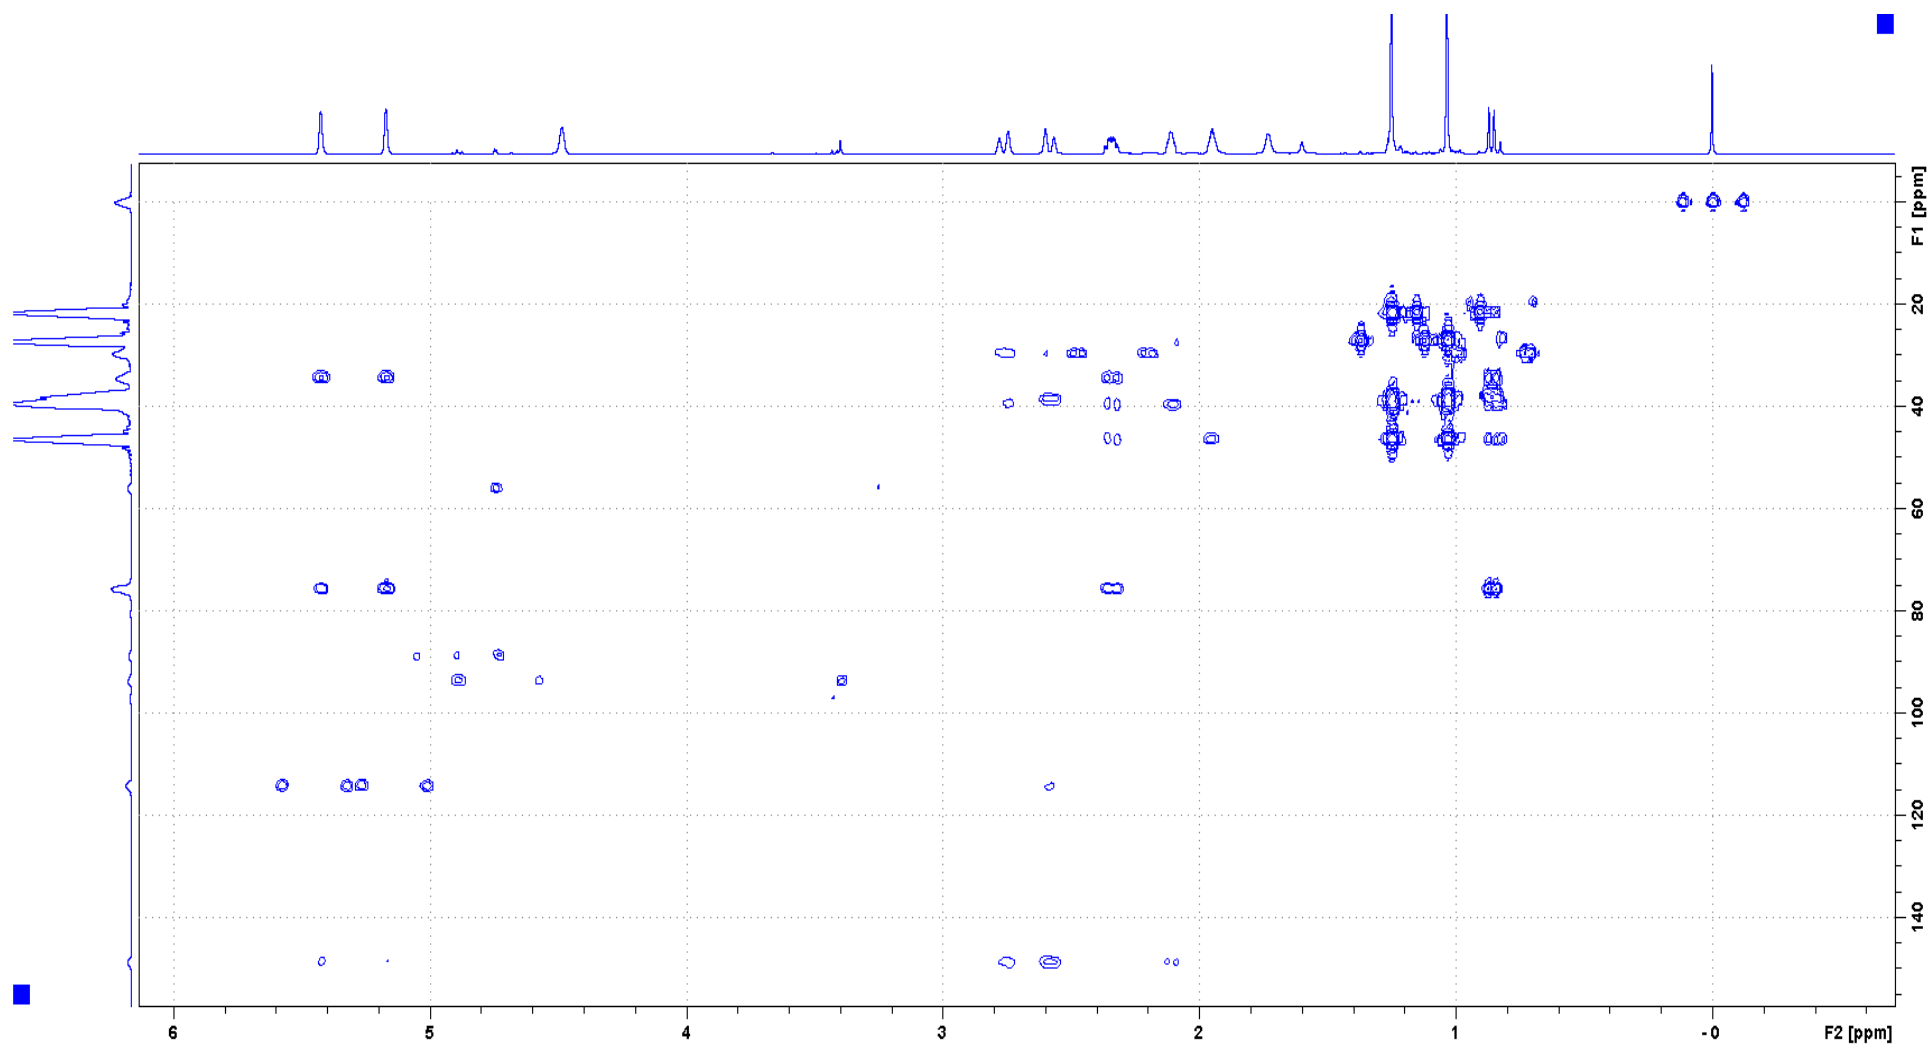

NOESY for compound **4a**

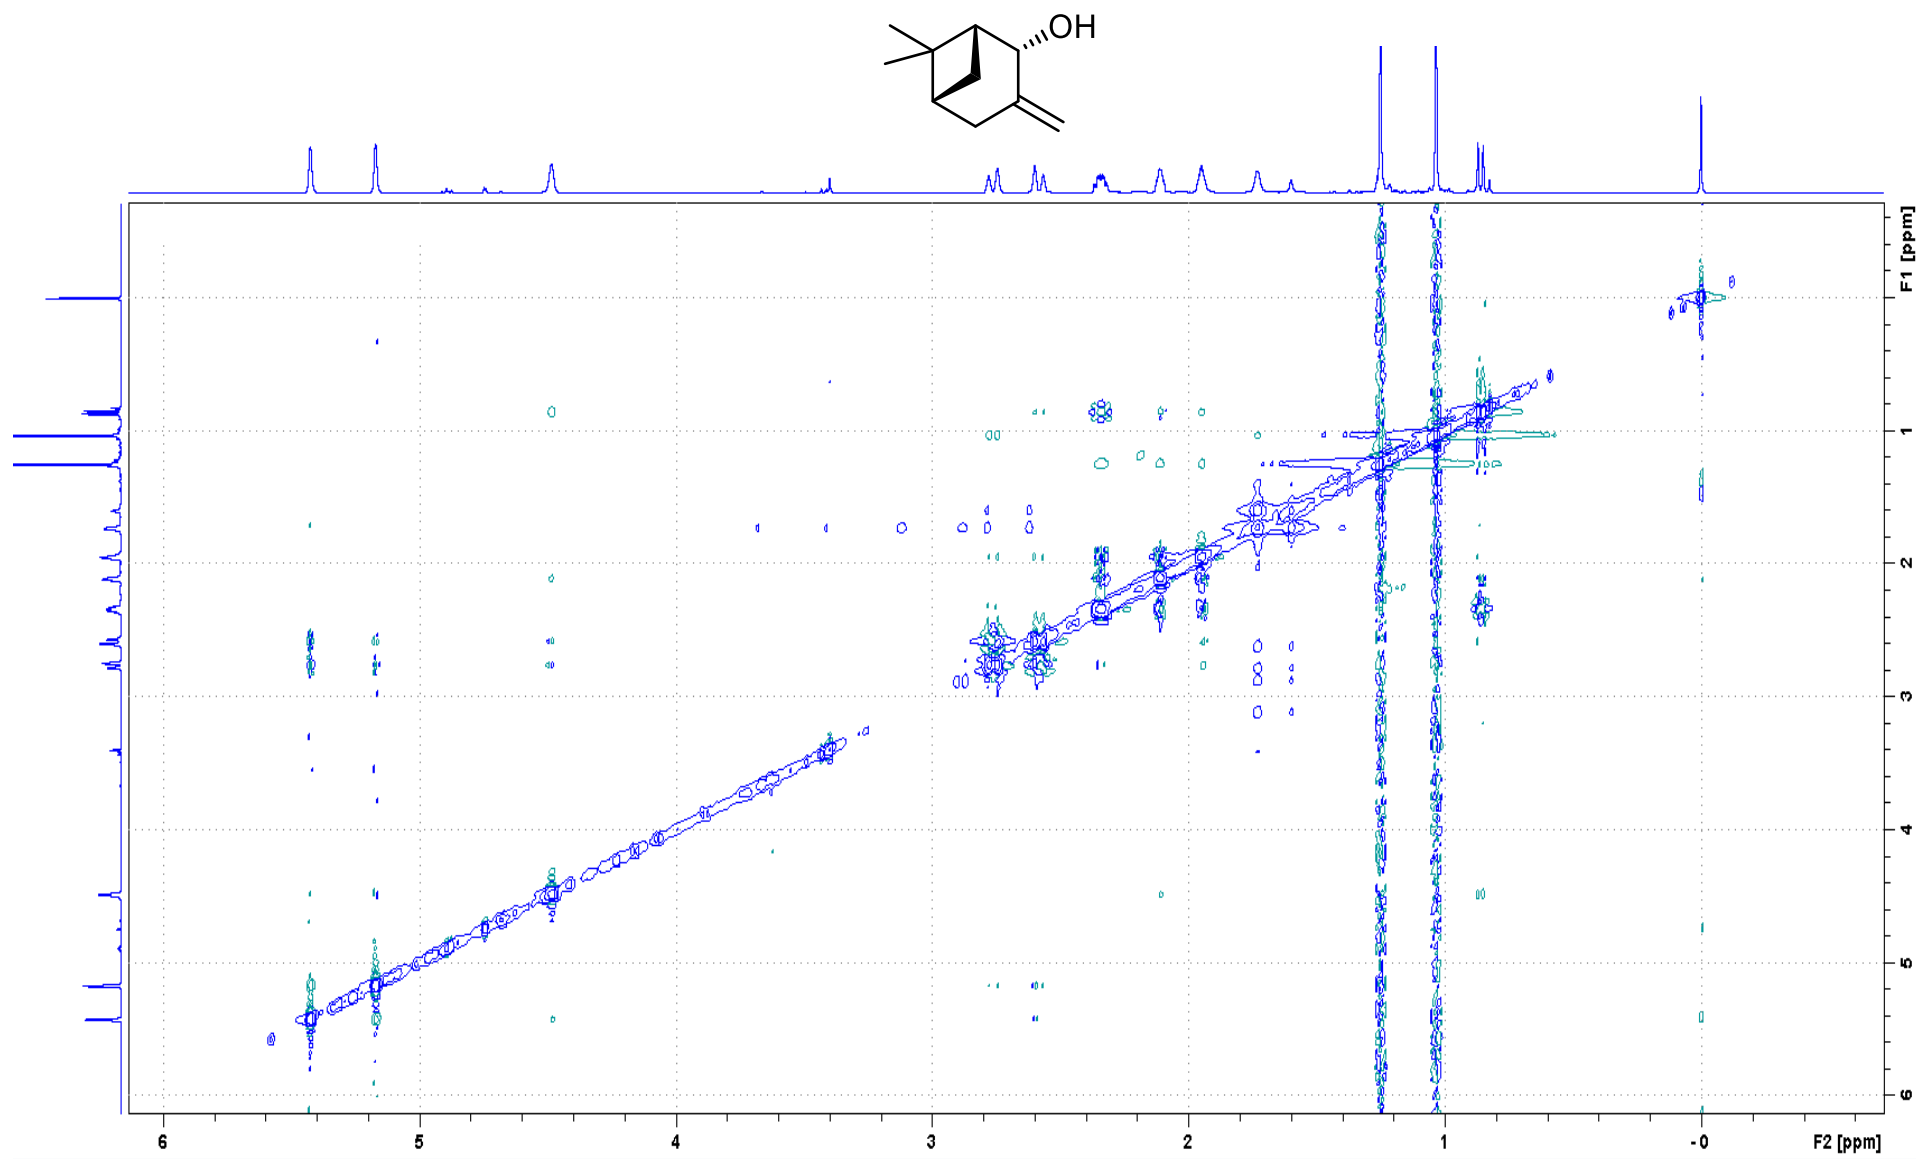

$^1\text{H}$ -NMR for compound **5**

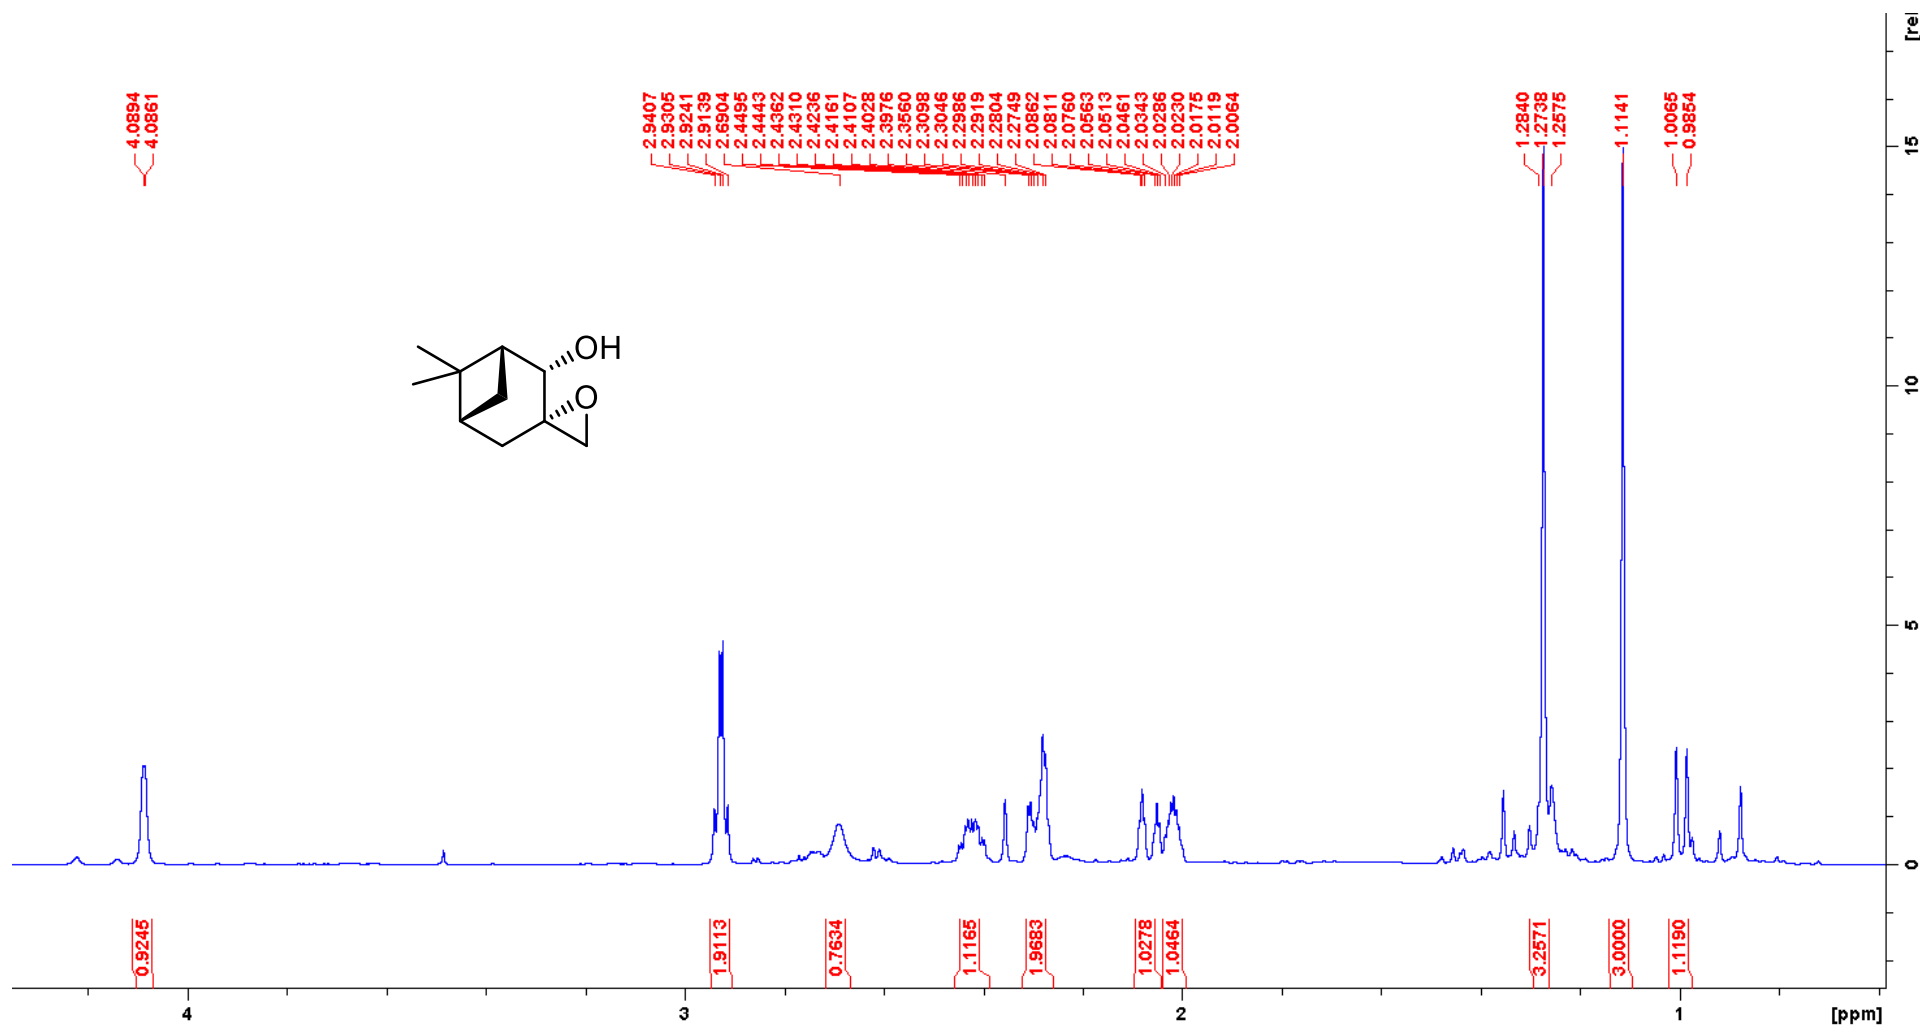



<sup>1</sup>H-NMR for compound **6**

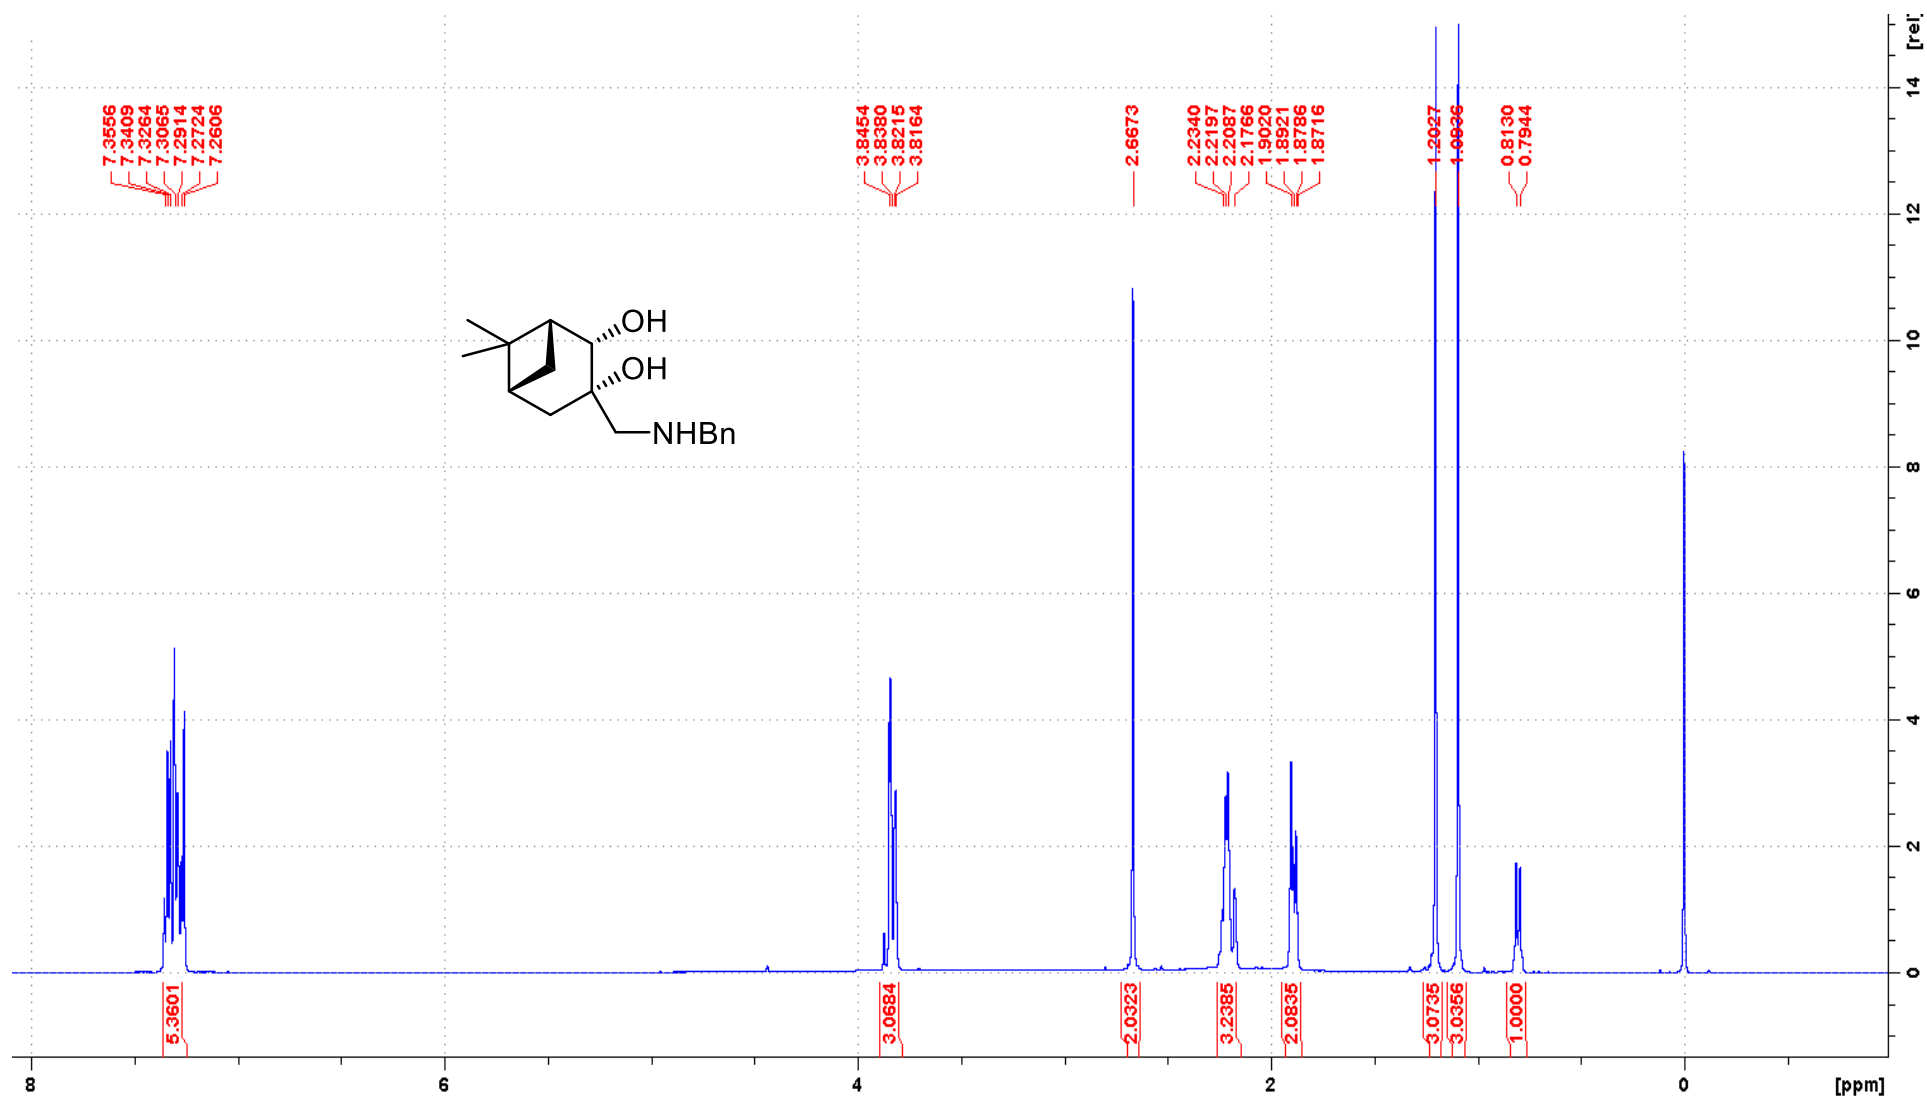

$^{13}\text{C}$ -NMR for compound **6**

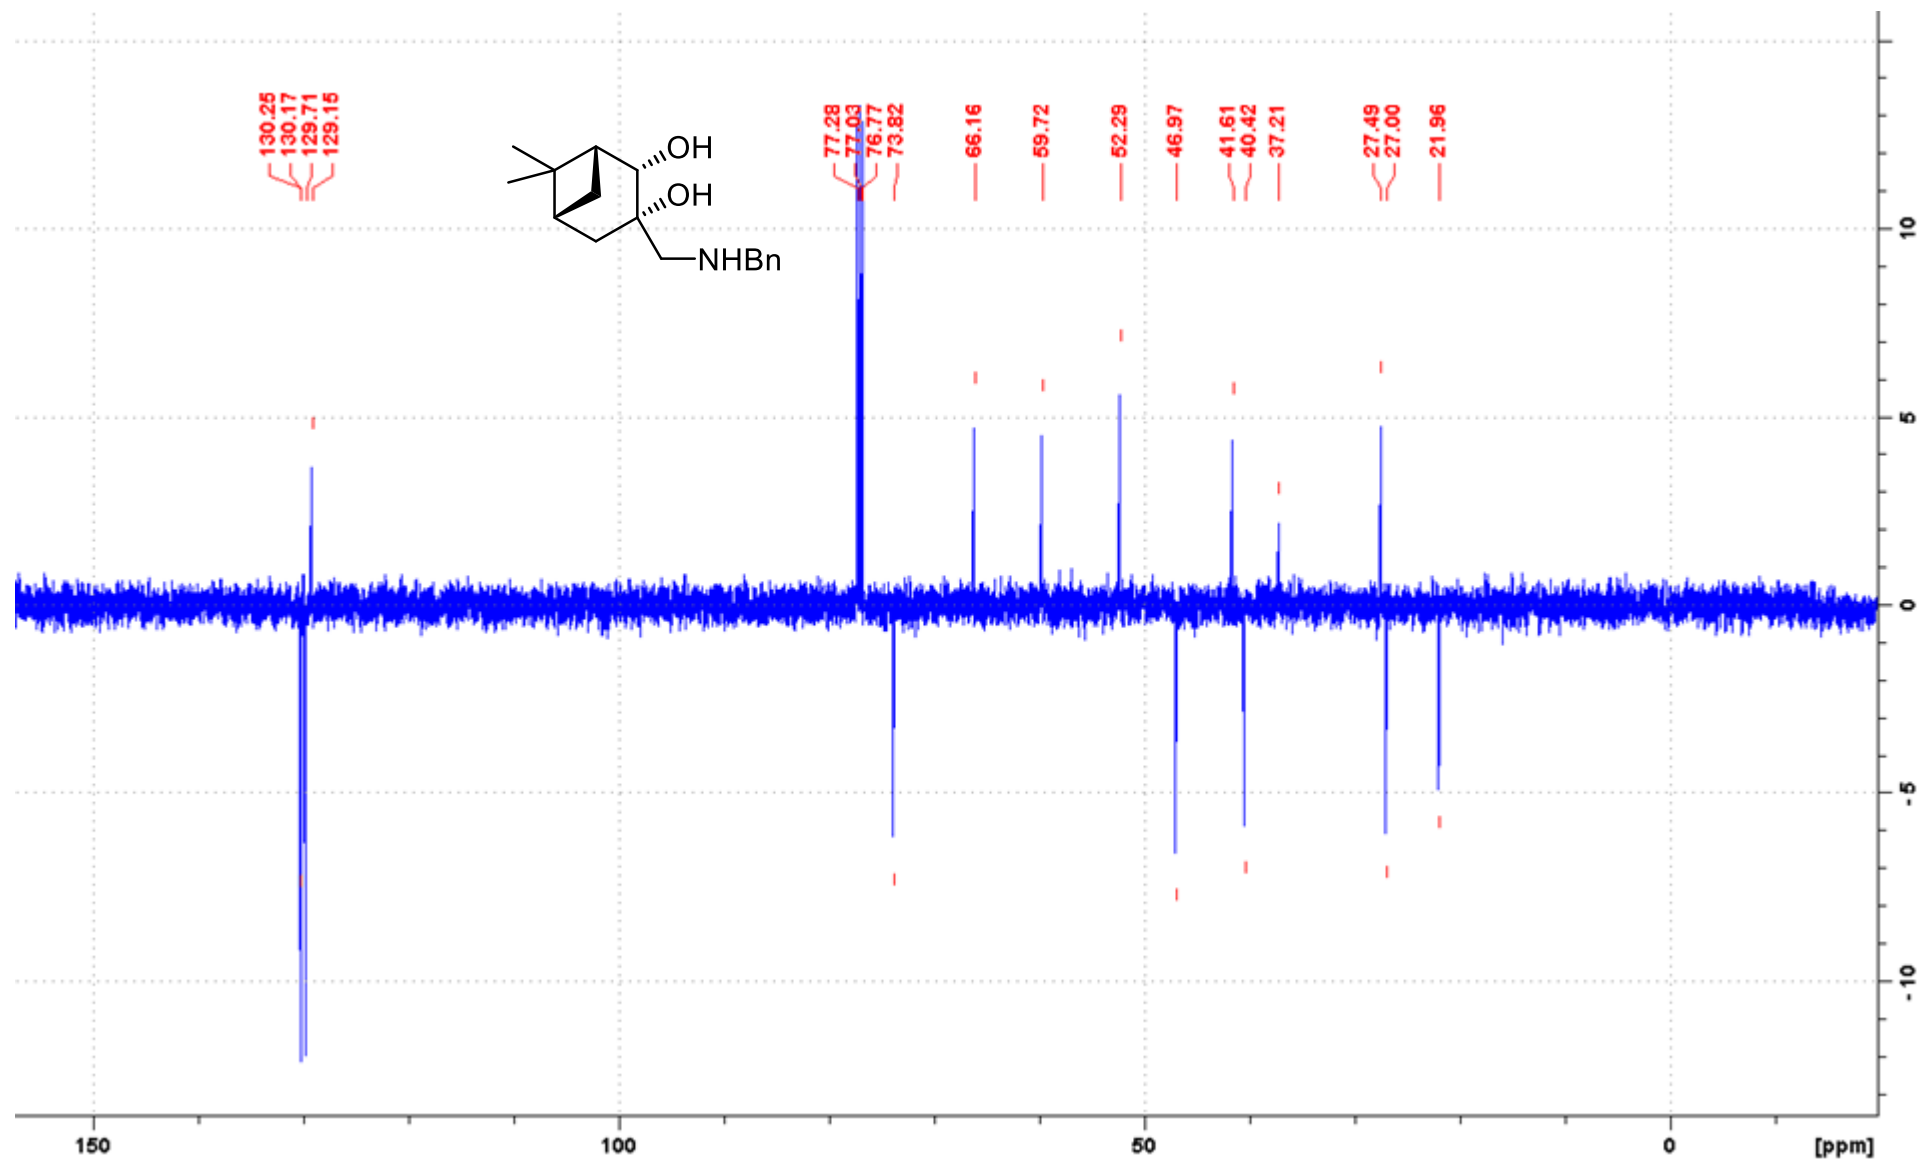

<sup>1</sup>H-NMR for compound **7**

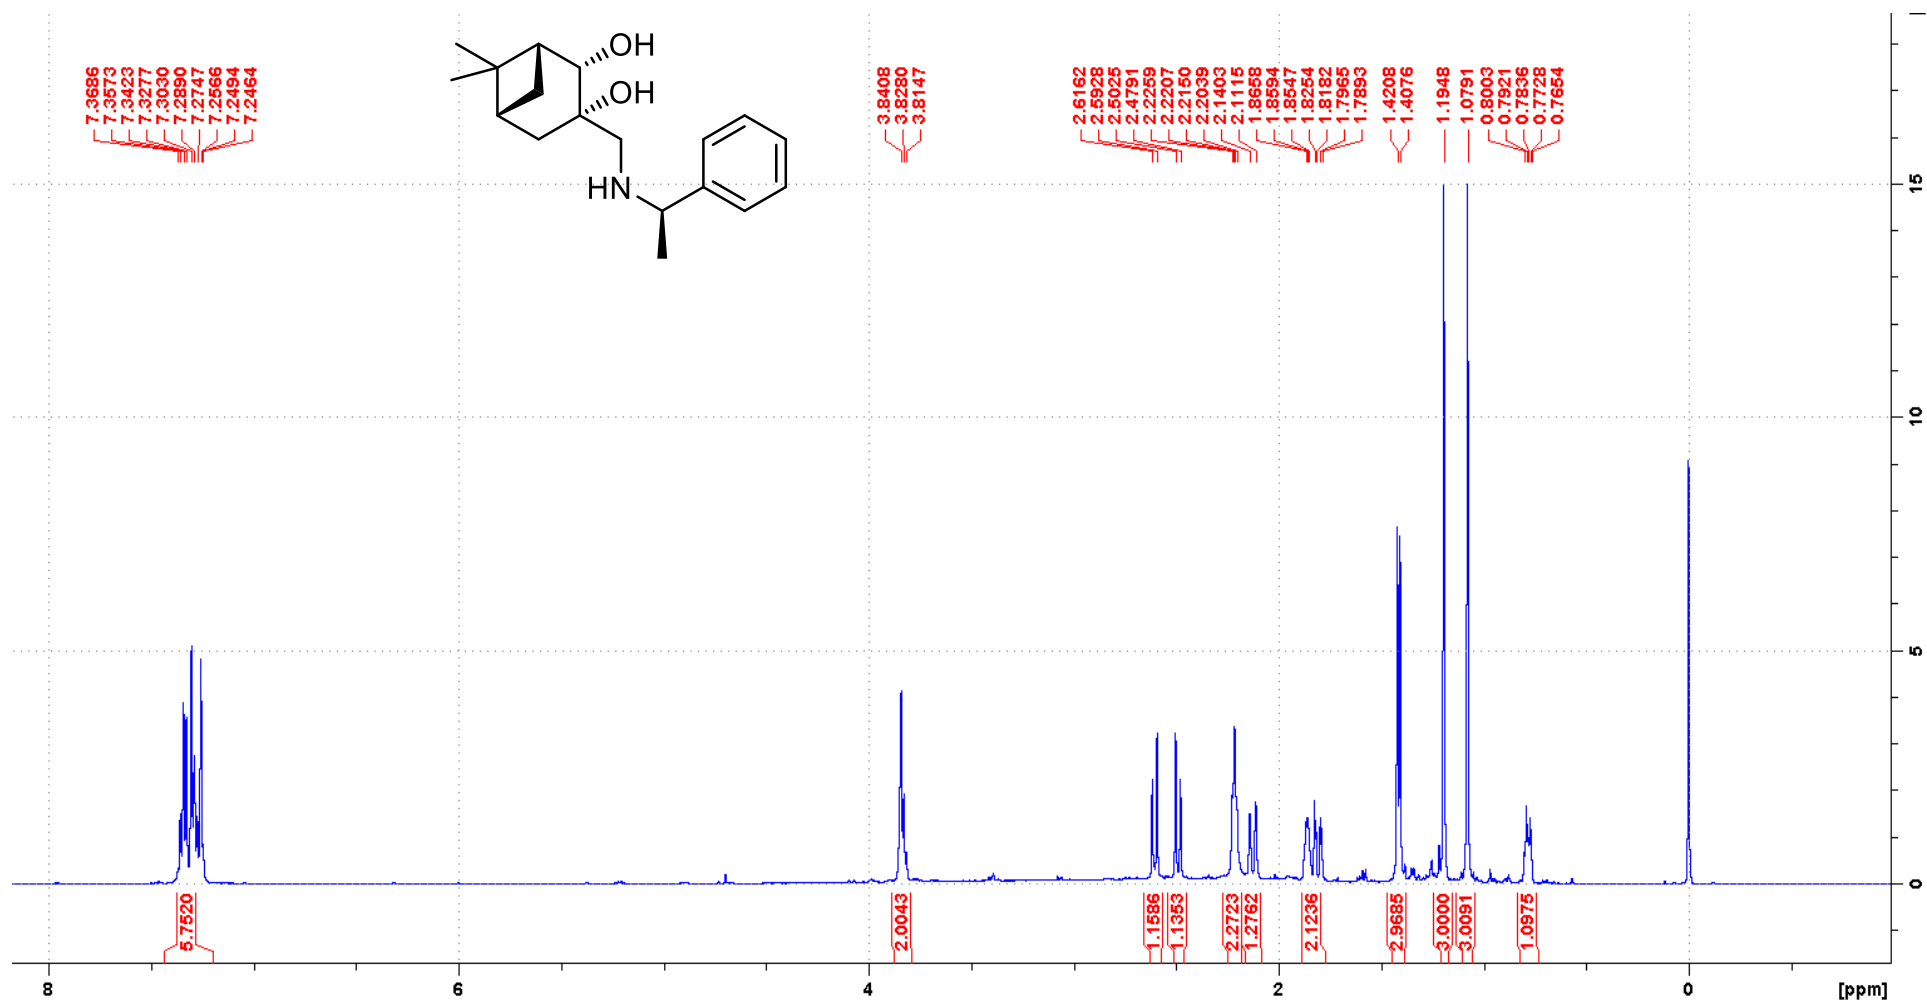

$^{13}\text{C}$ -NMR for compound 7

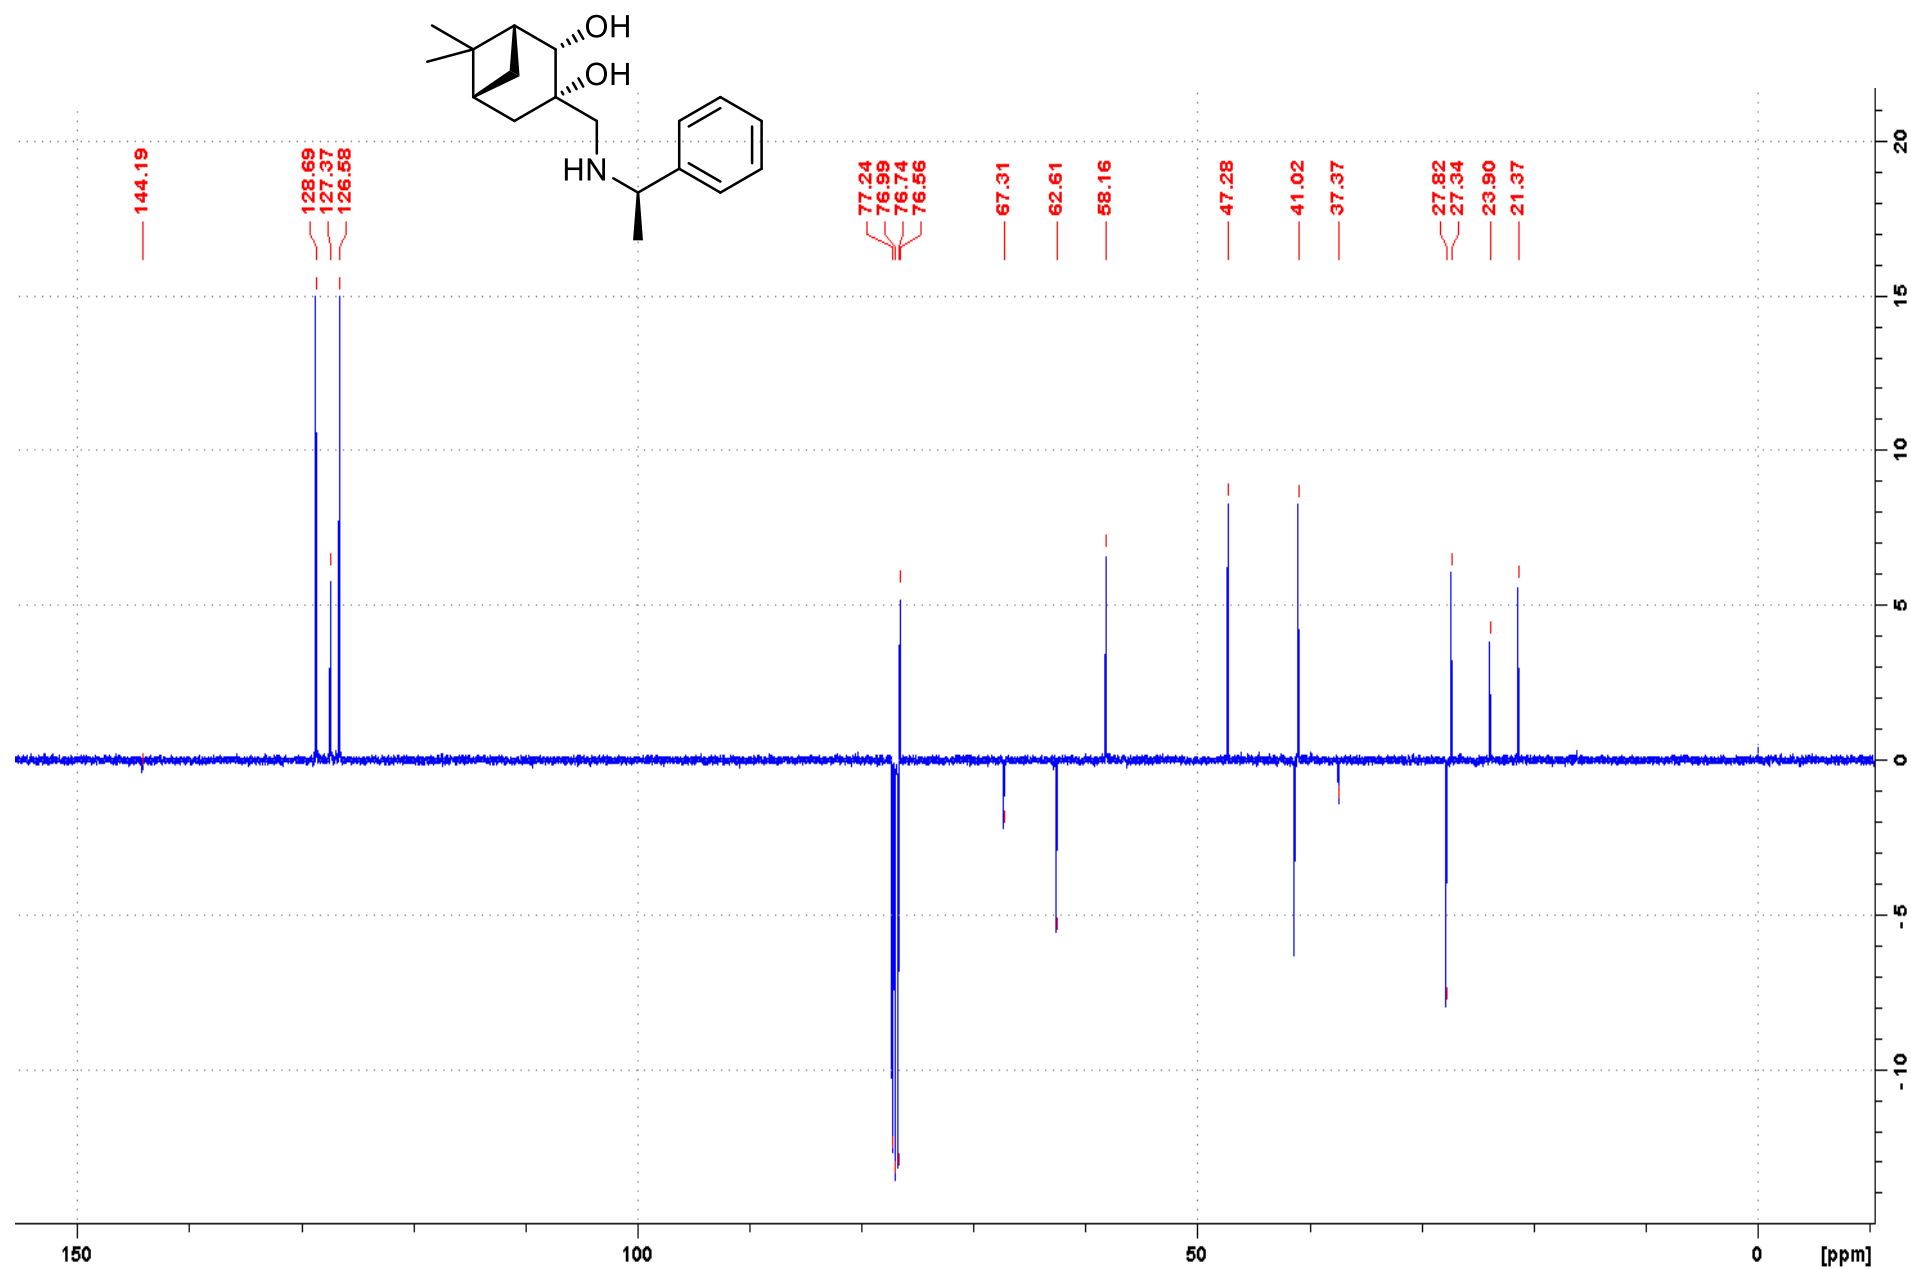

HSQC for compound **7**

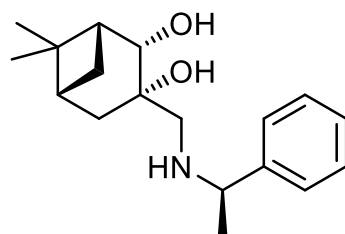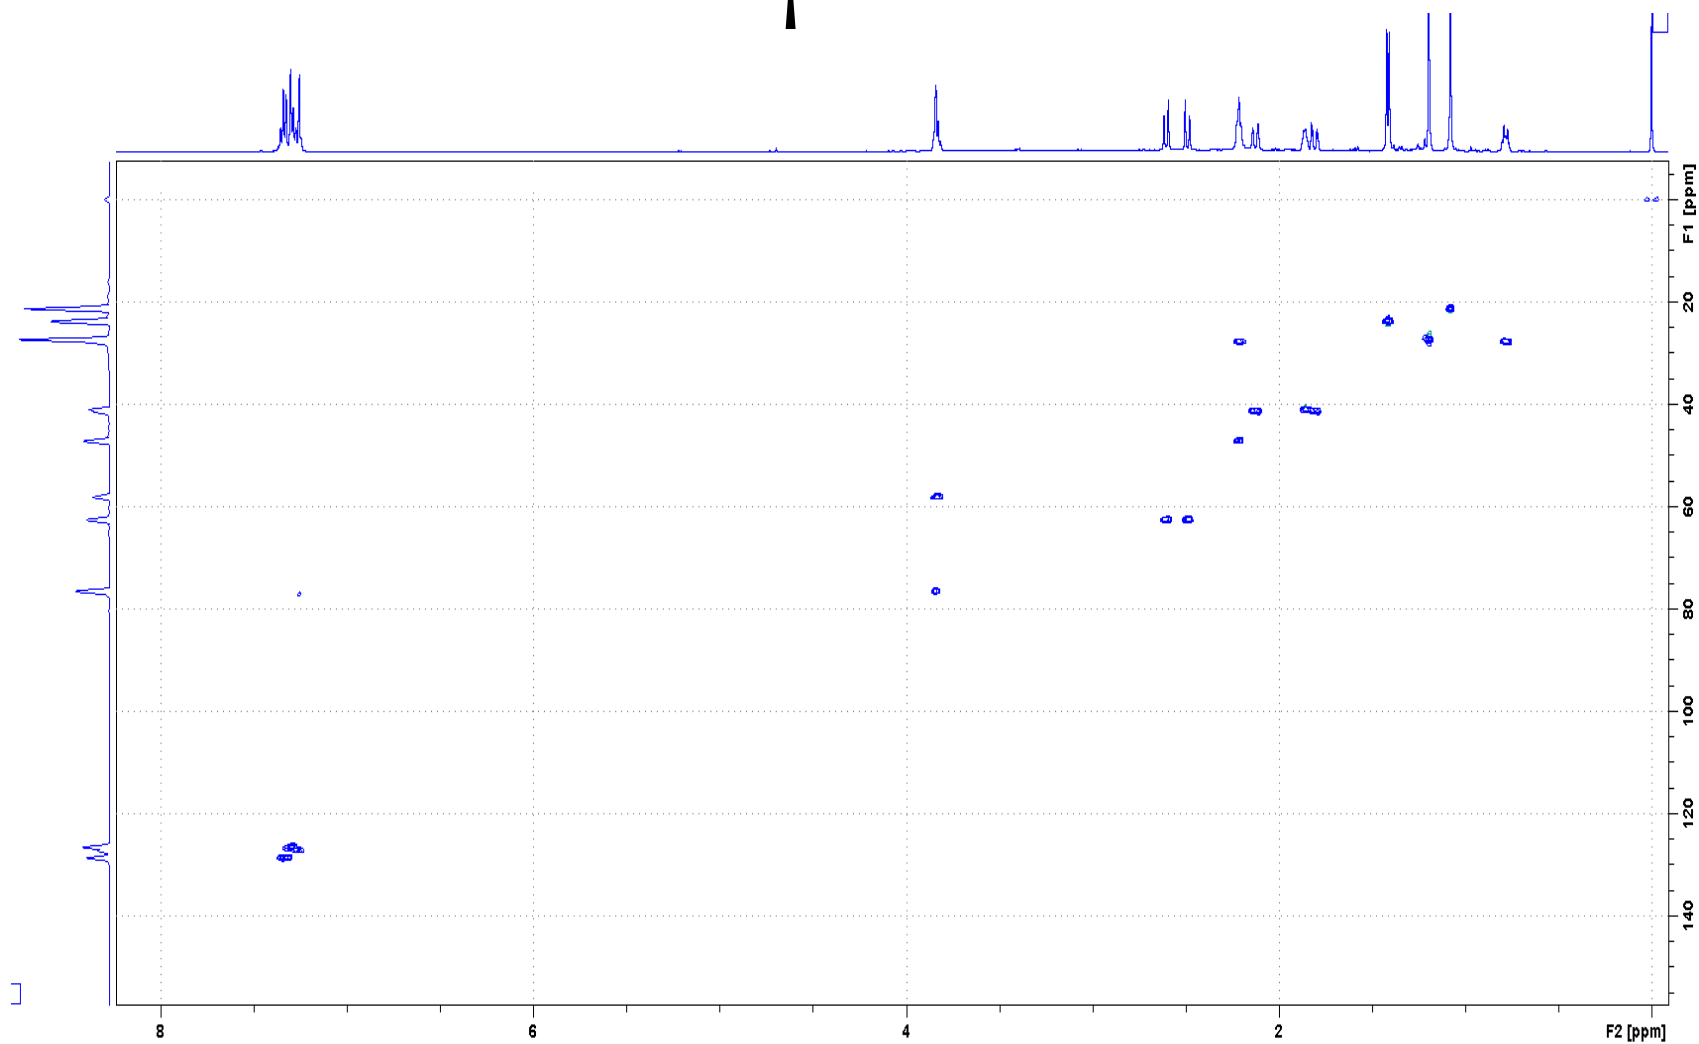

HMBC for compound 7

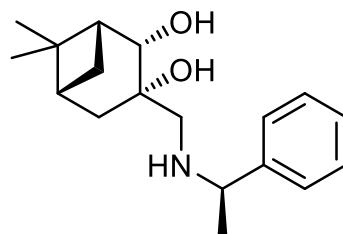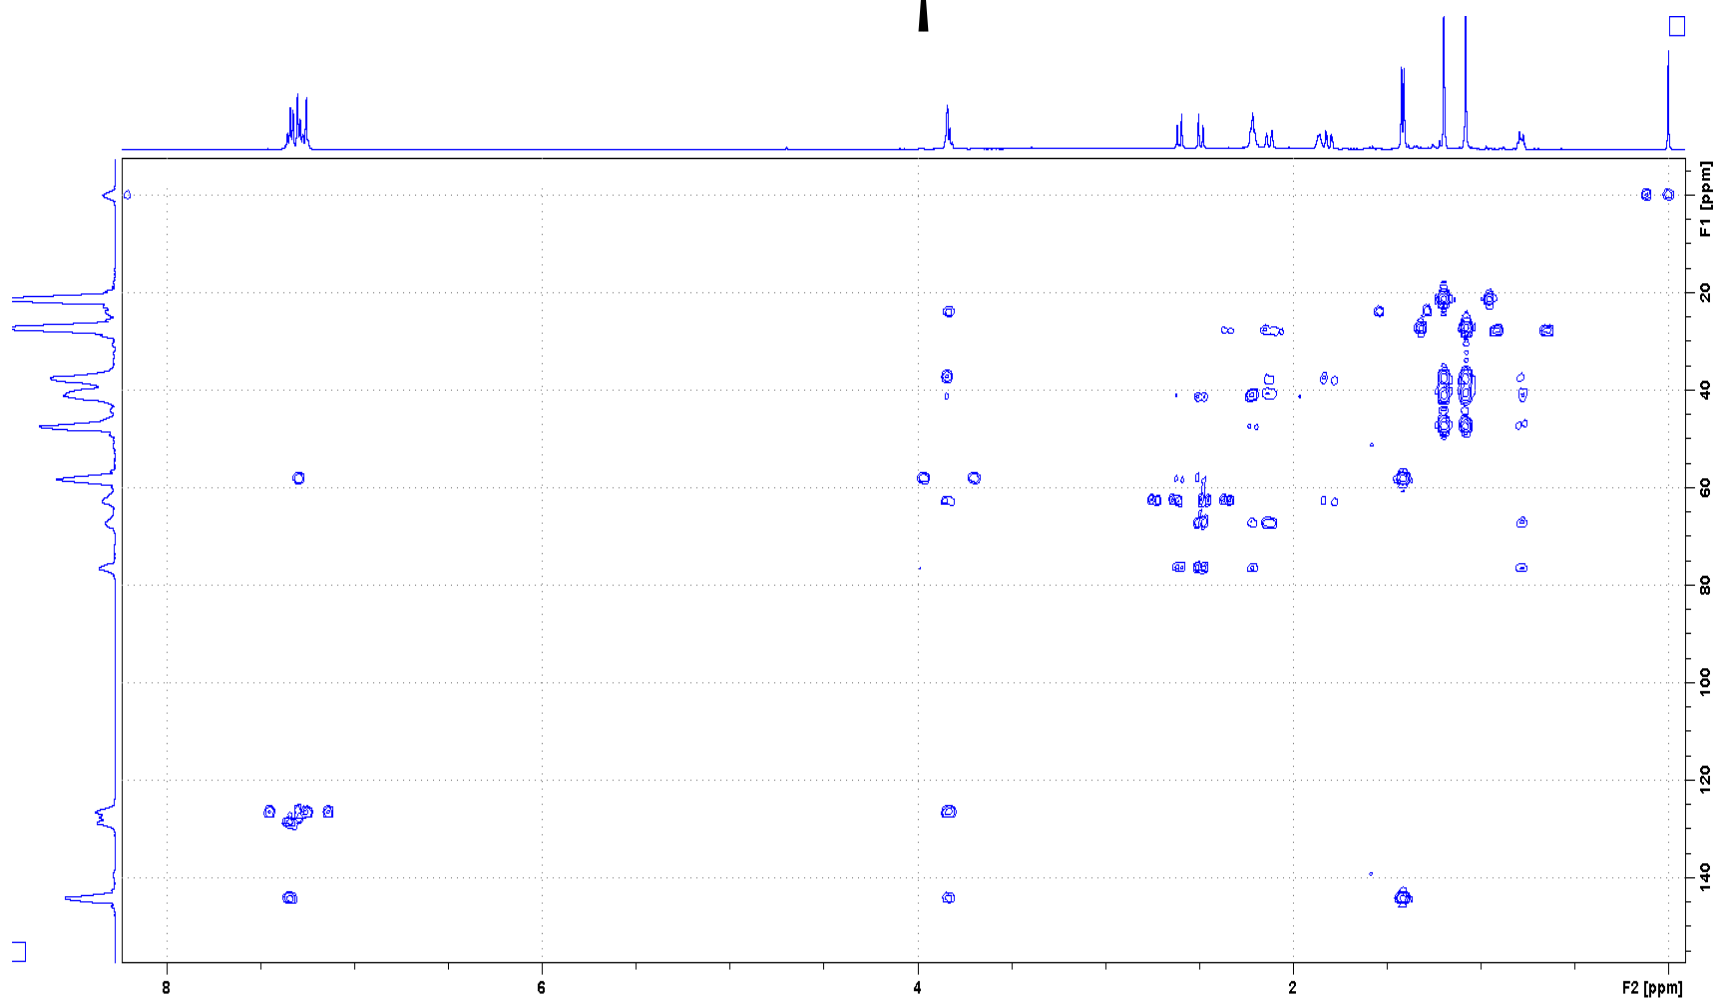

COSY for compound **7**

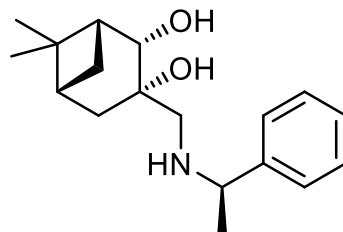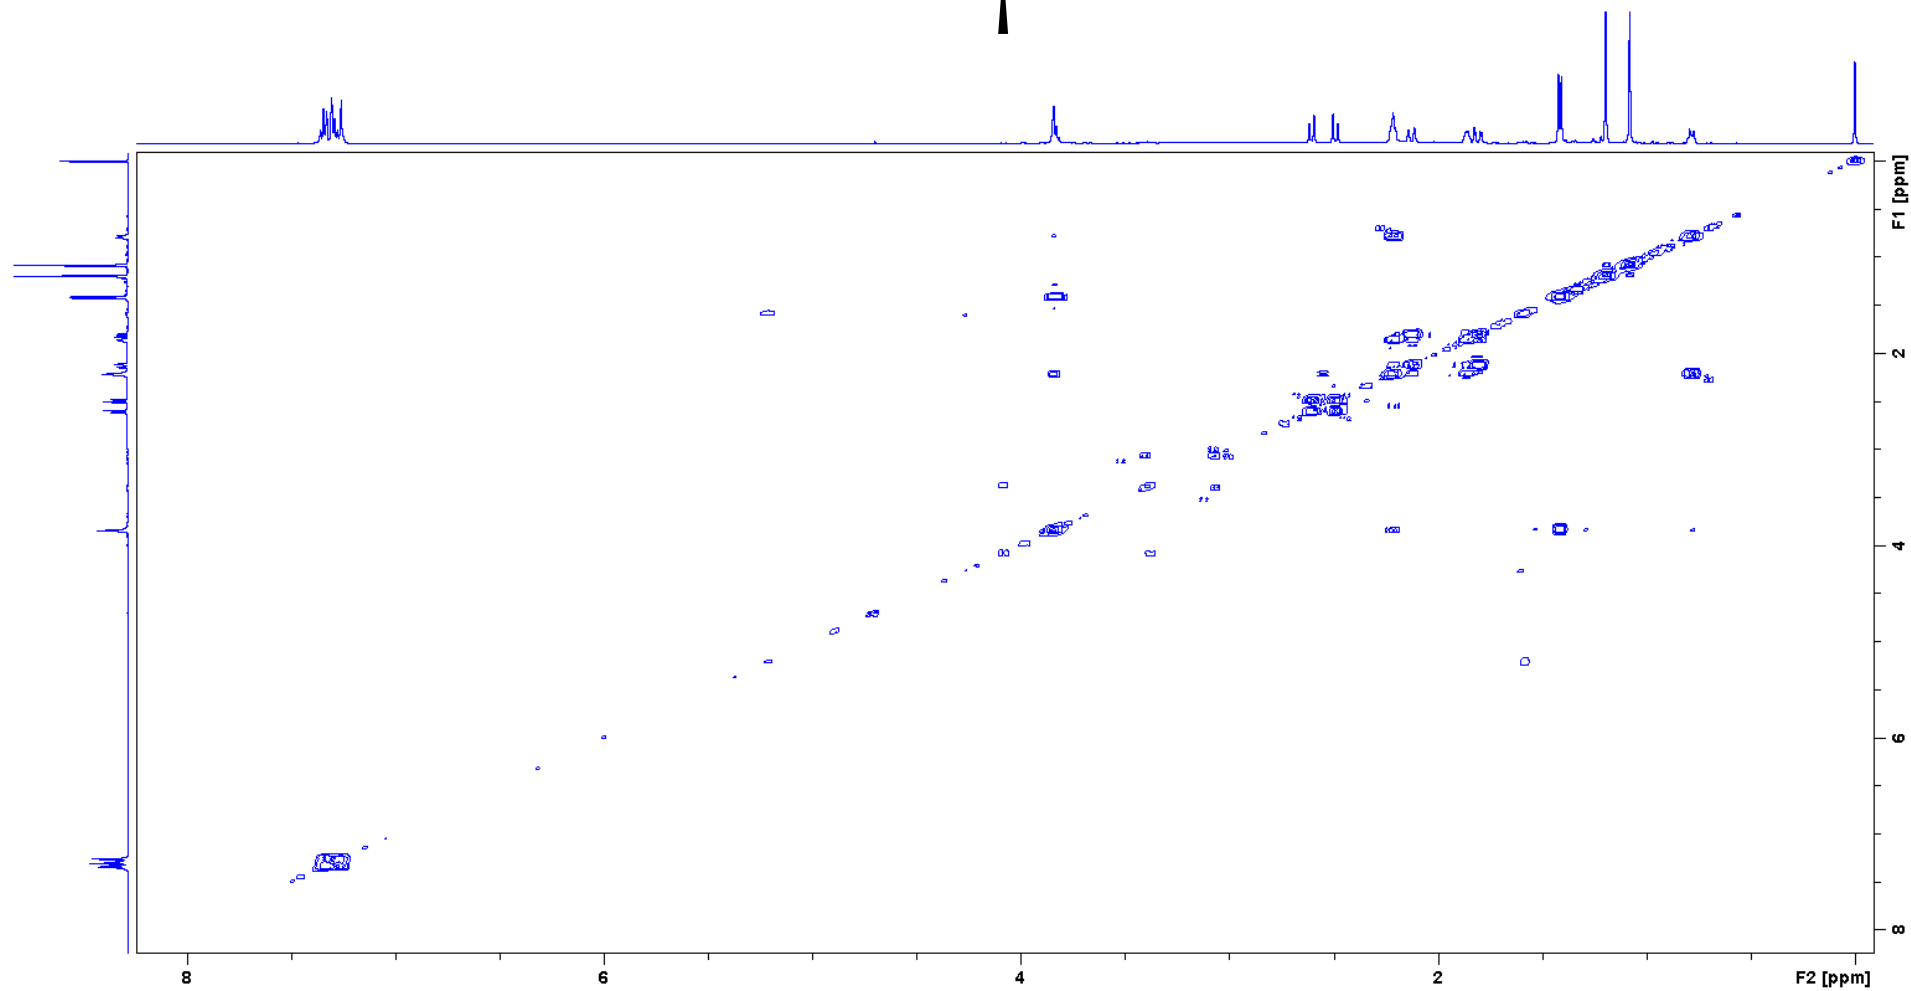

NOESY for compound **7**

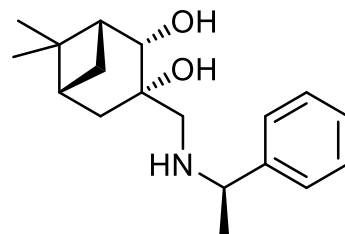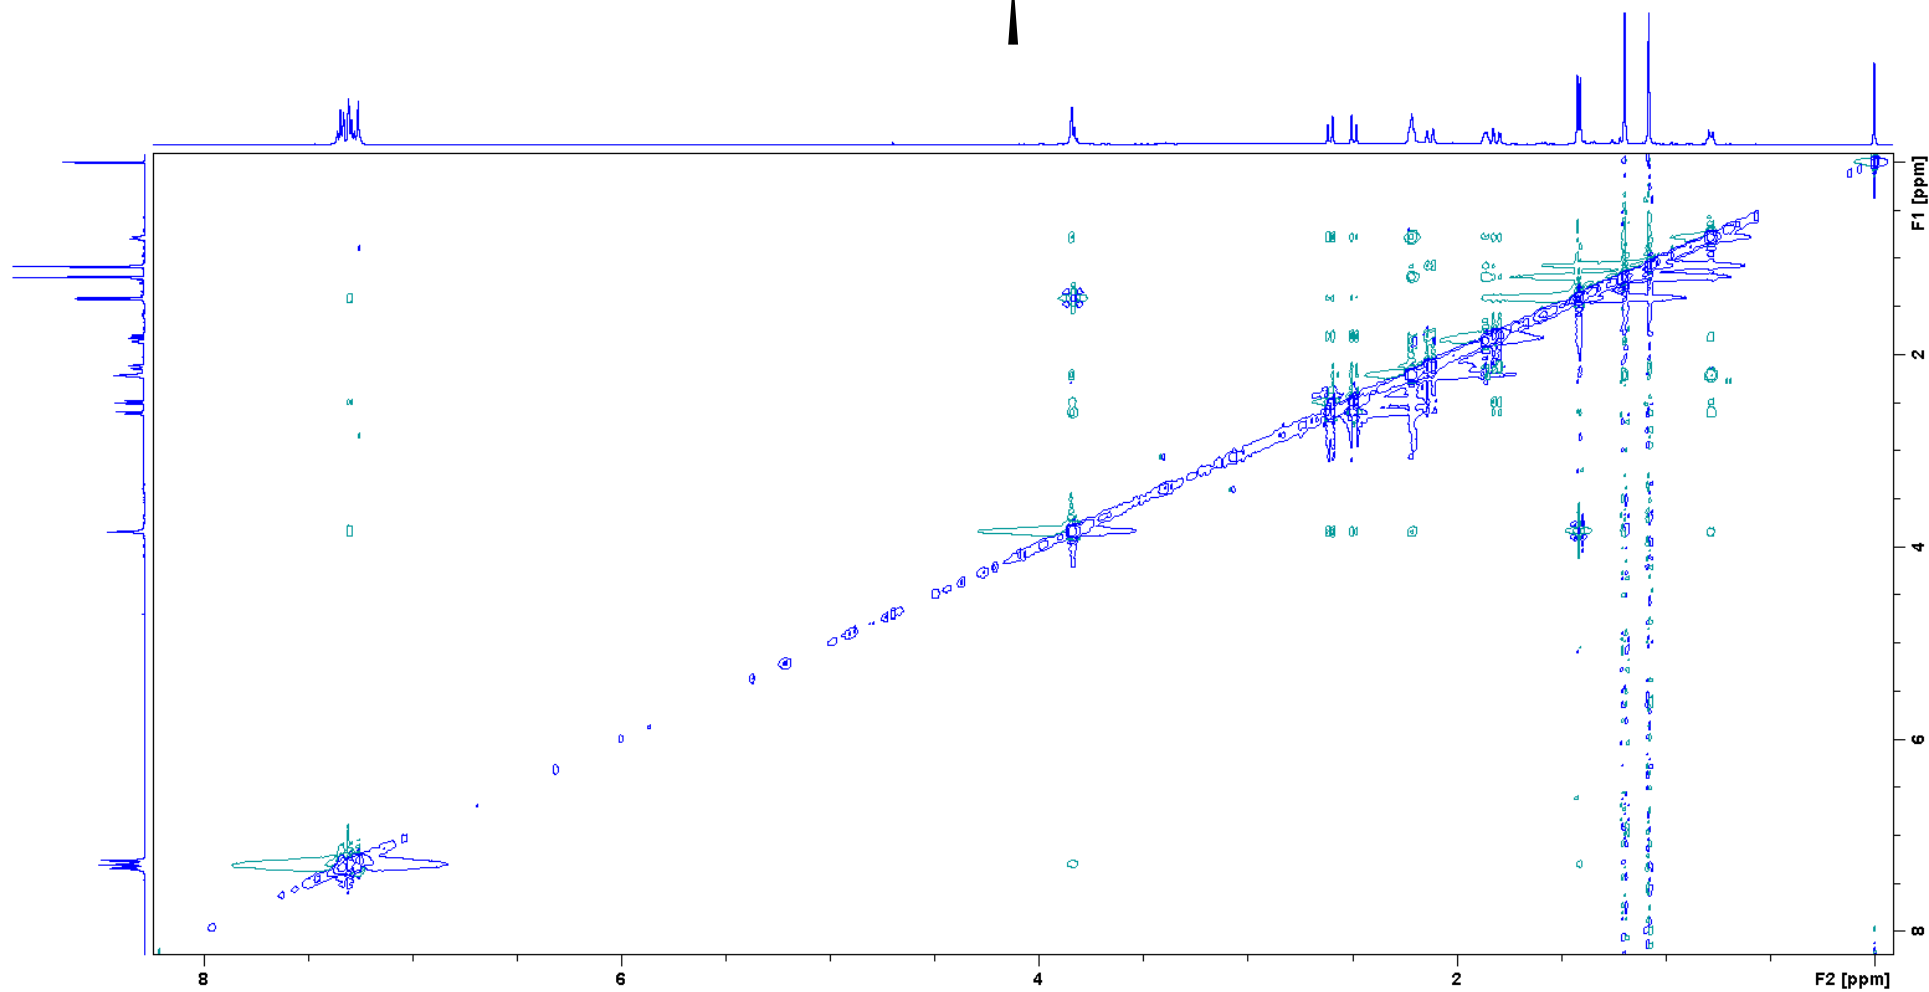



<sup>1</sup>H-NMR for compound **8**

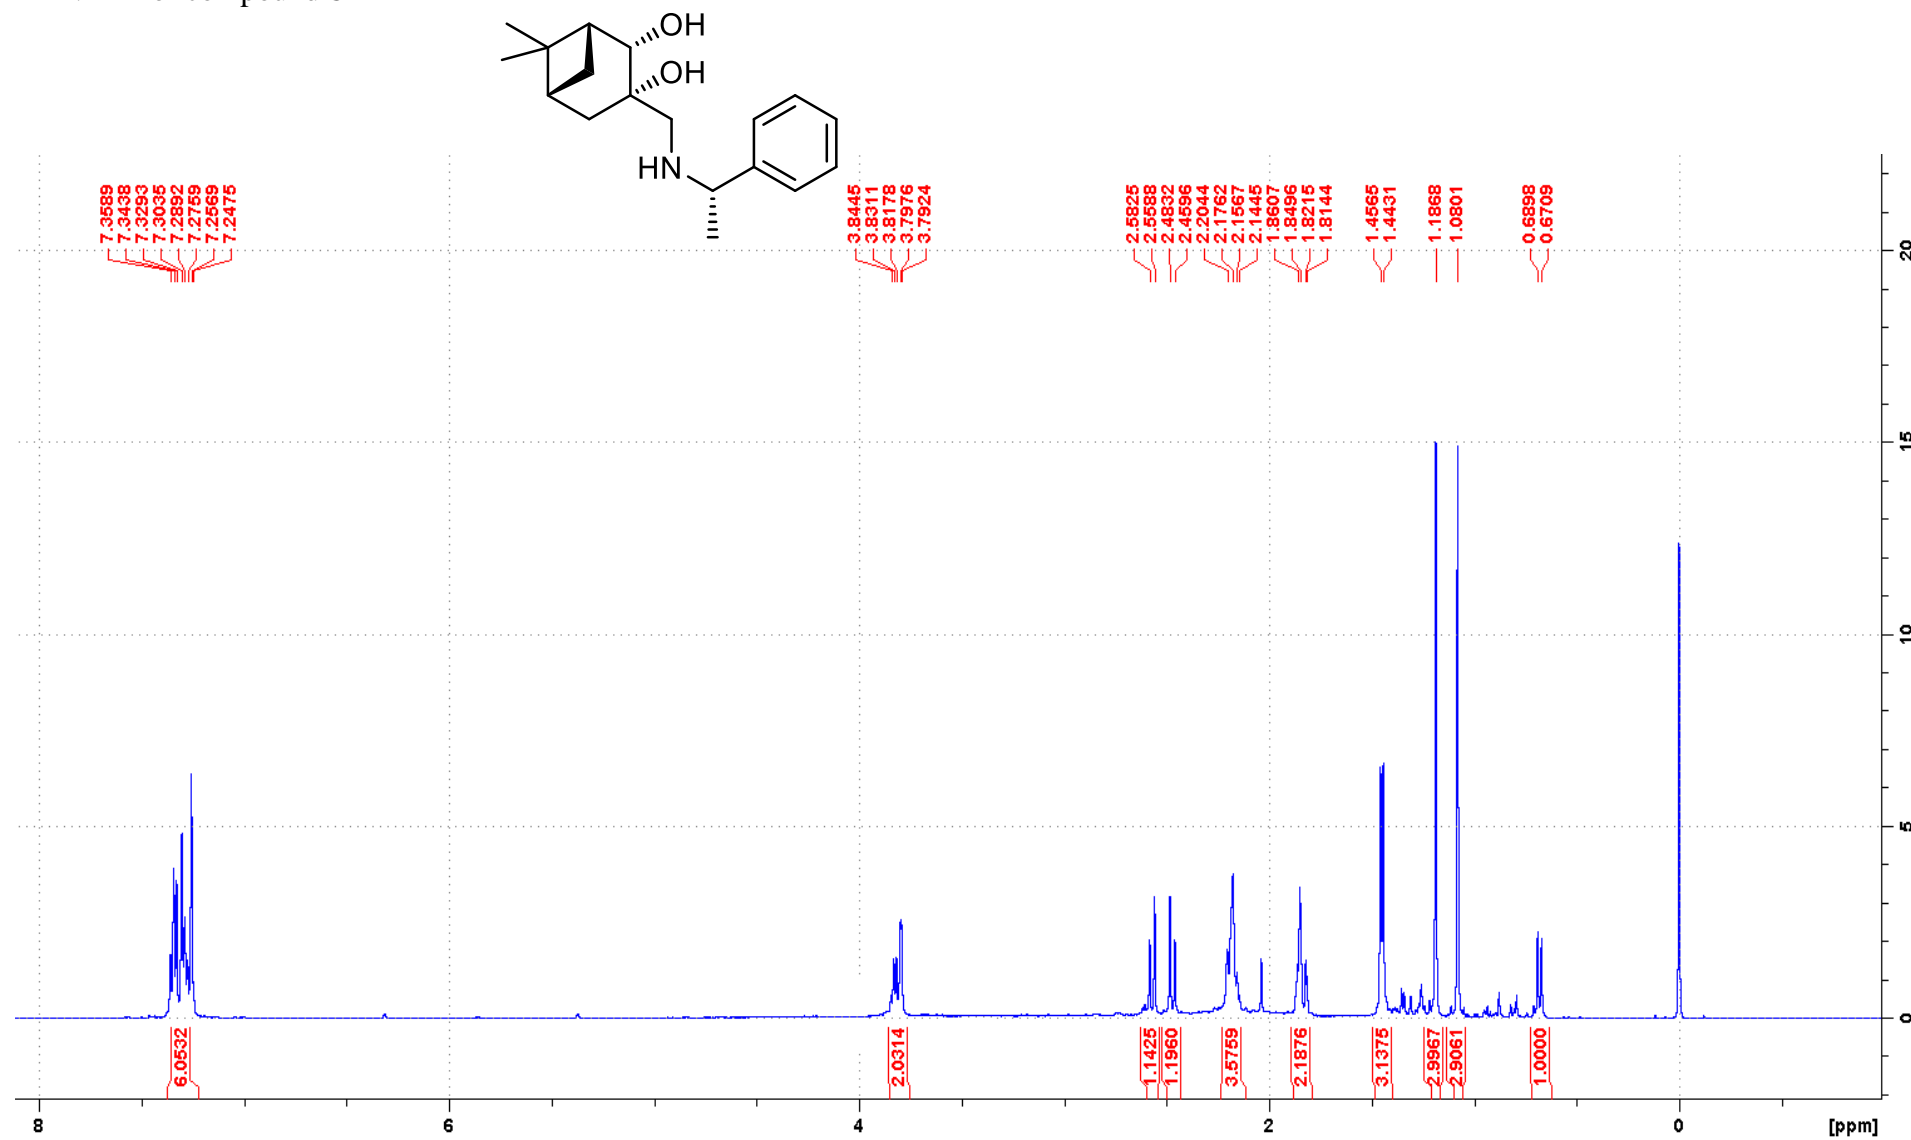

$^{13}\text{C}$ -NMR for compound **8**

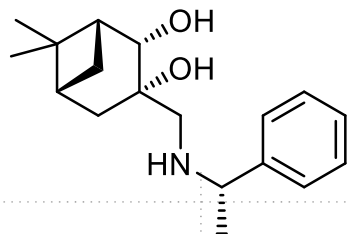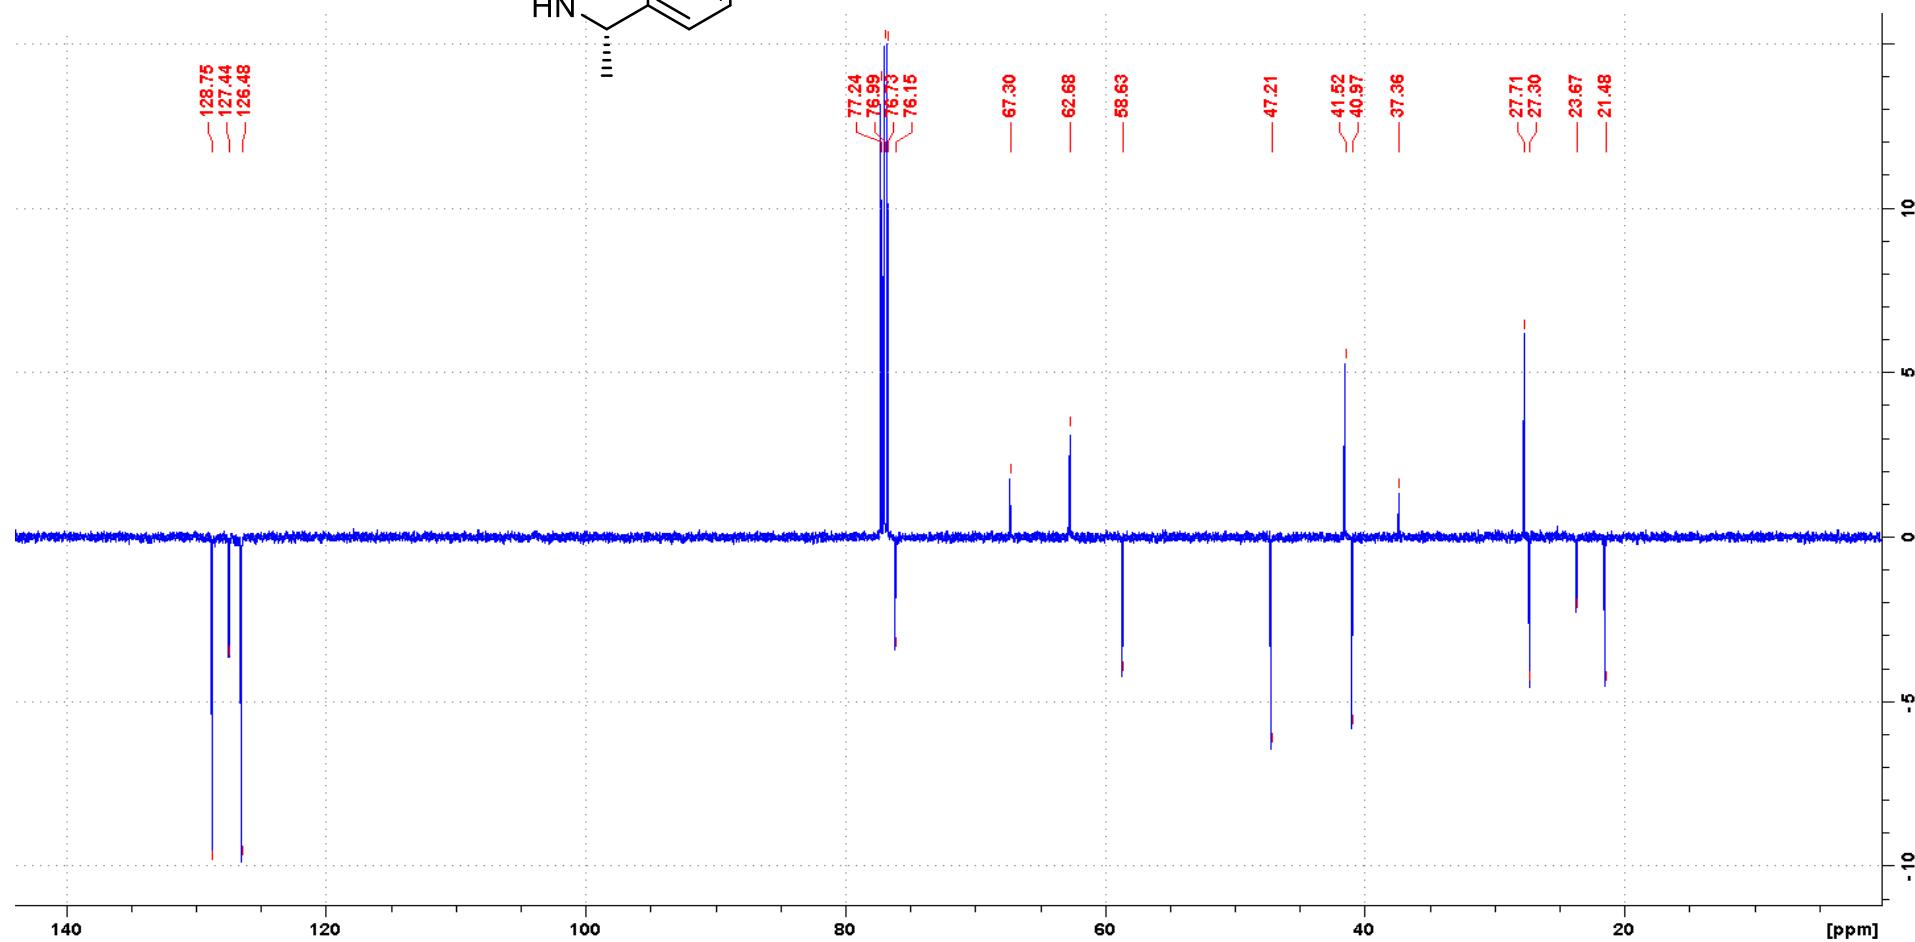

HSQC for compound **8**

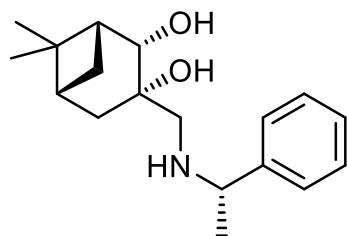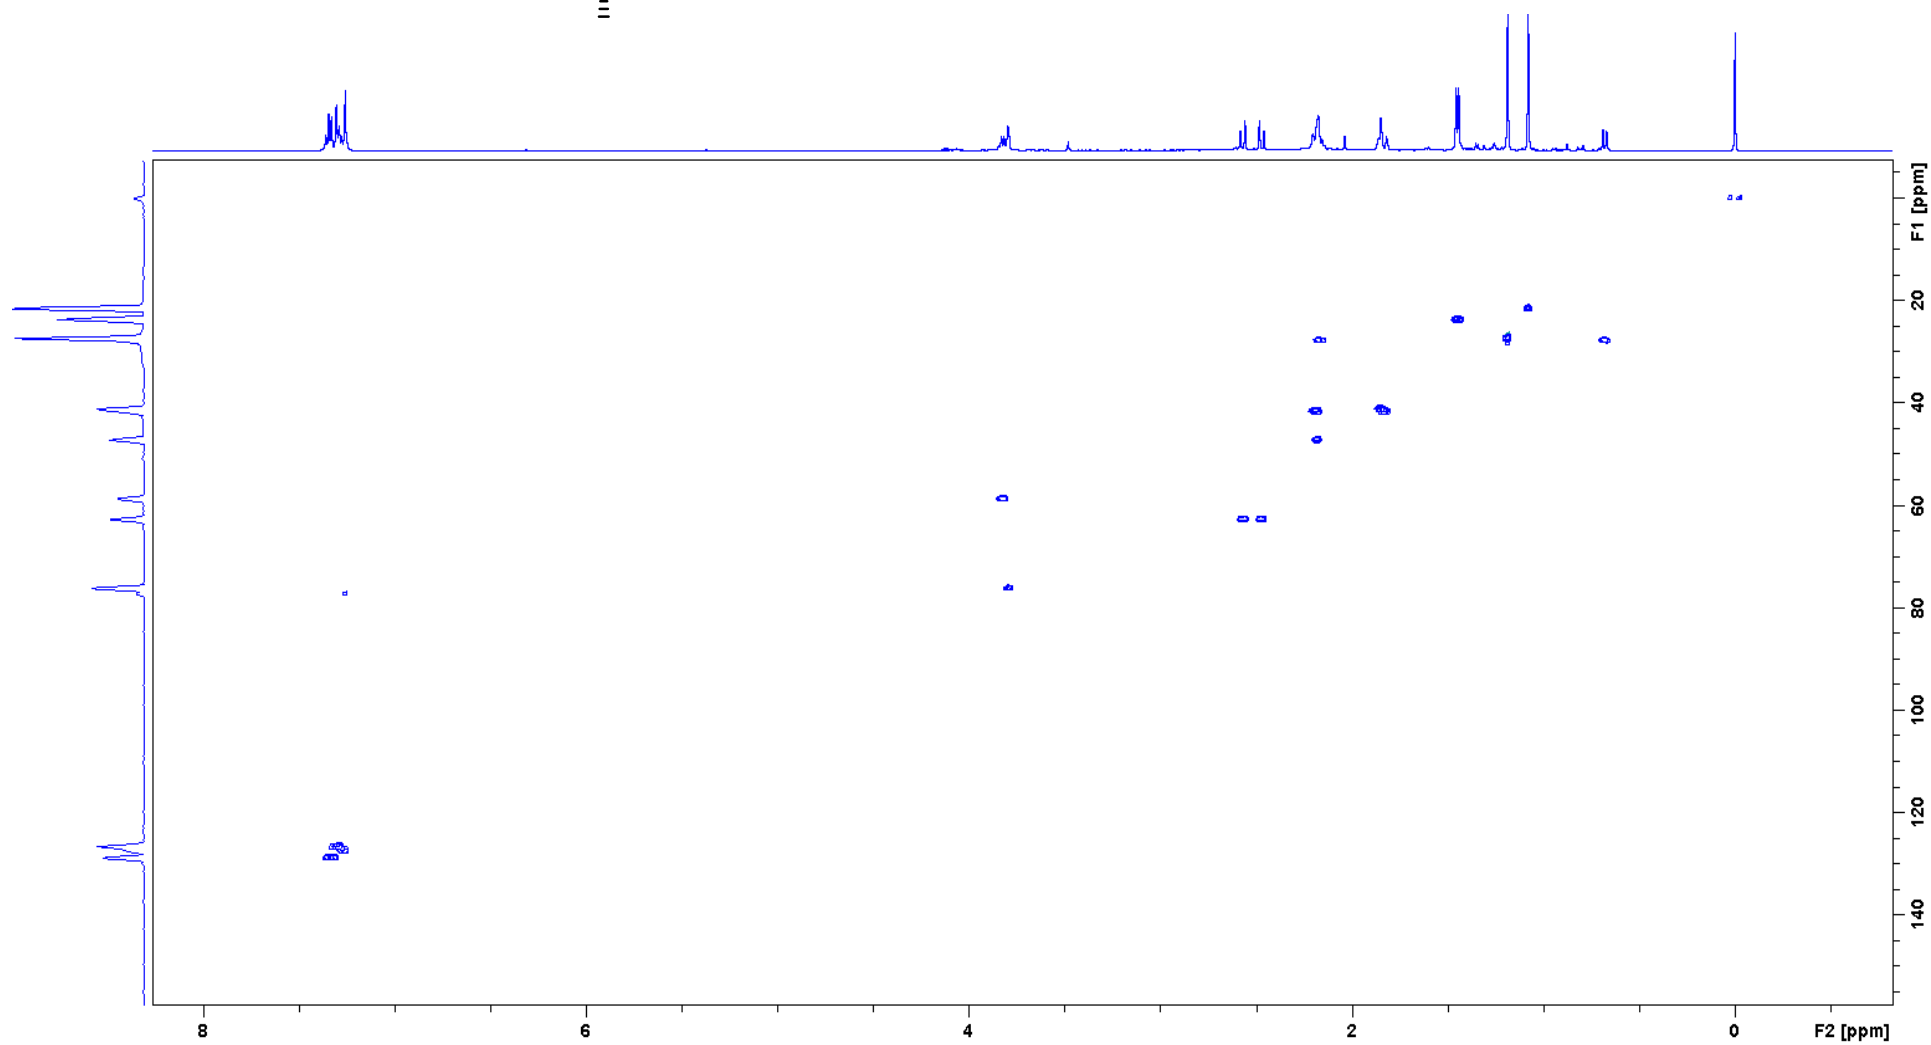

HMBC for compound **8**

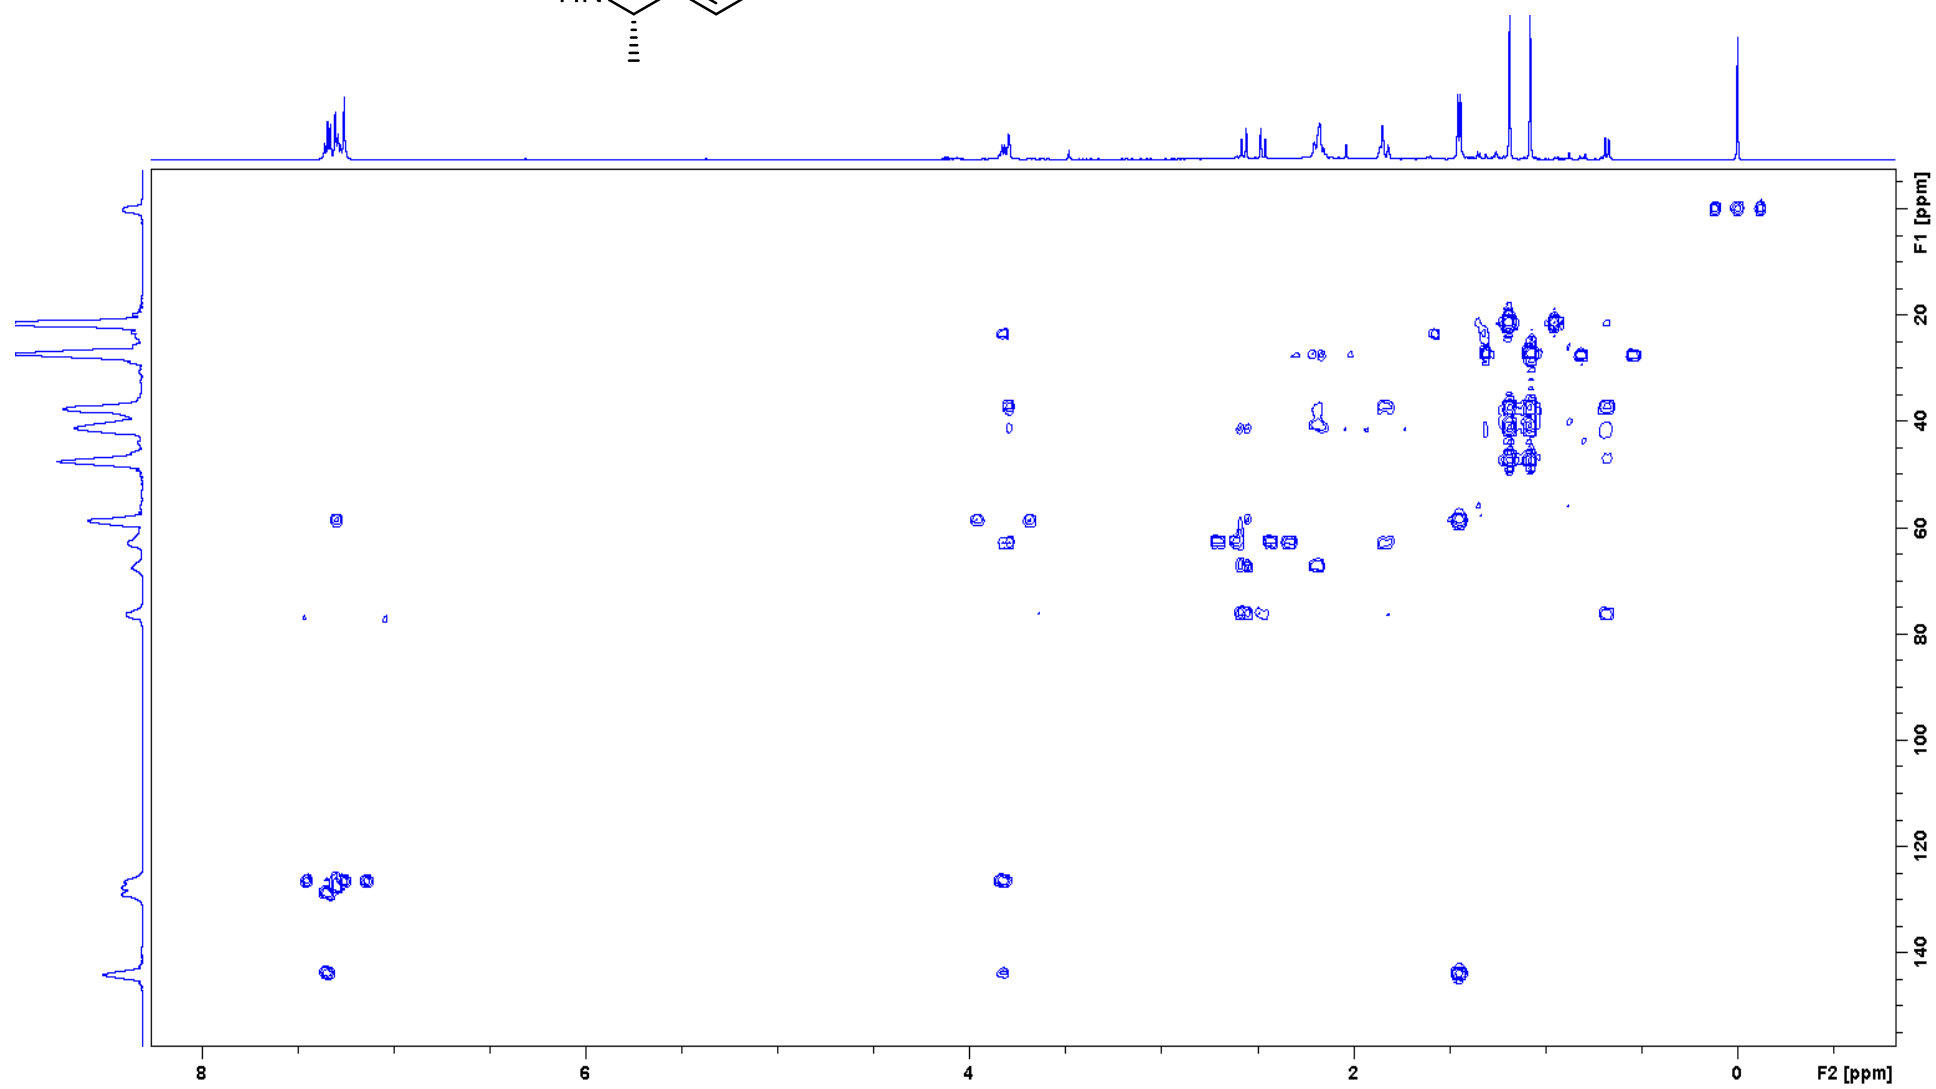

NOESY for compound **8**

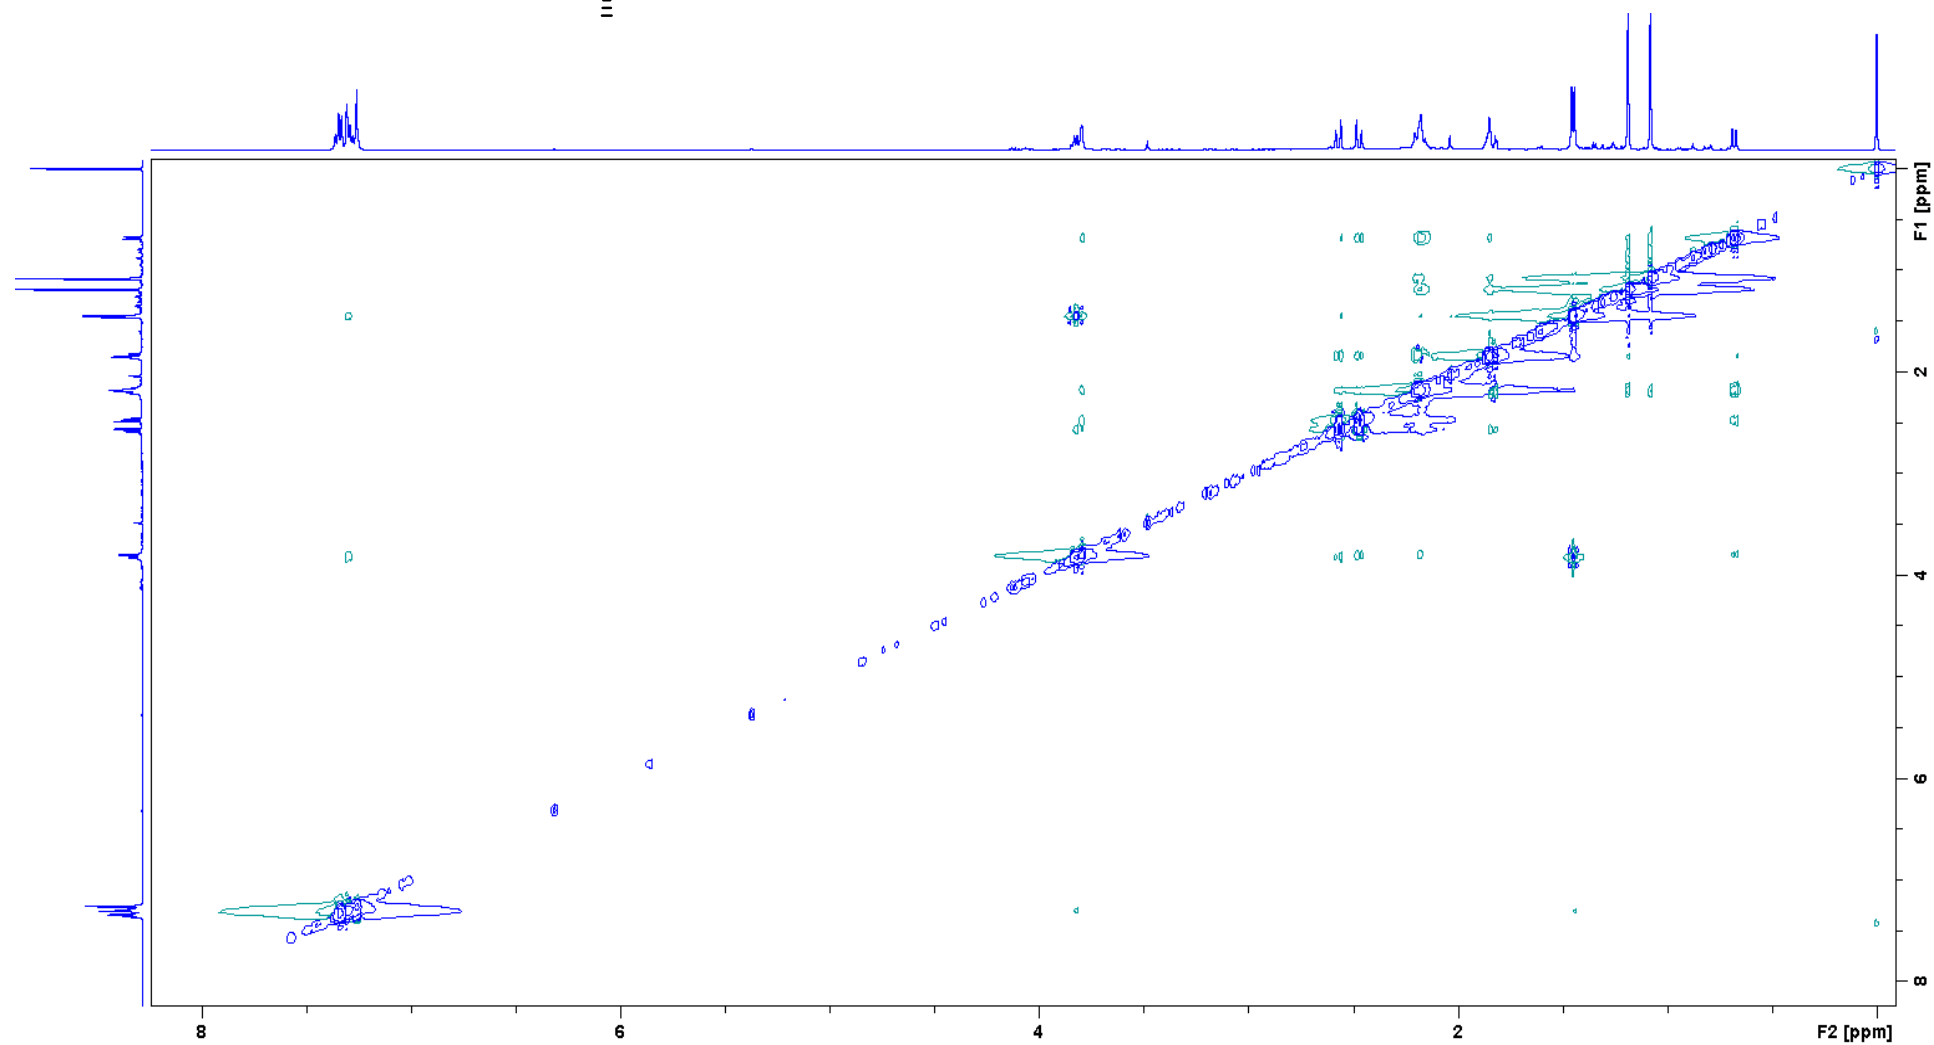

<sup>1</sup>H-NMR for compound **9**

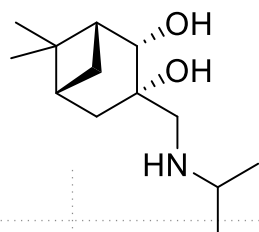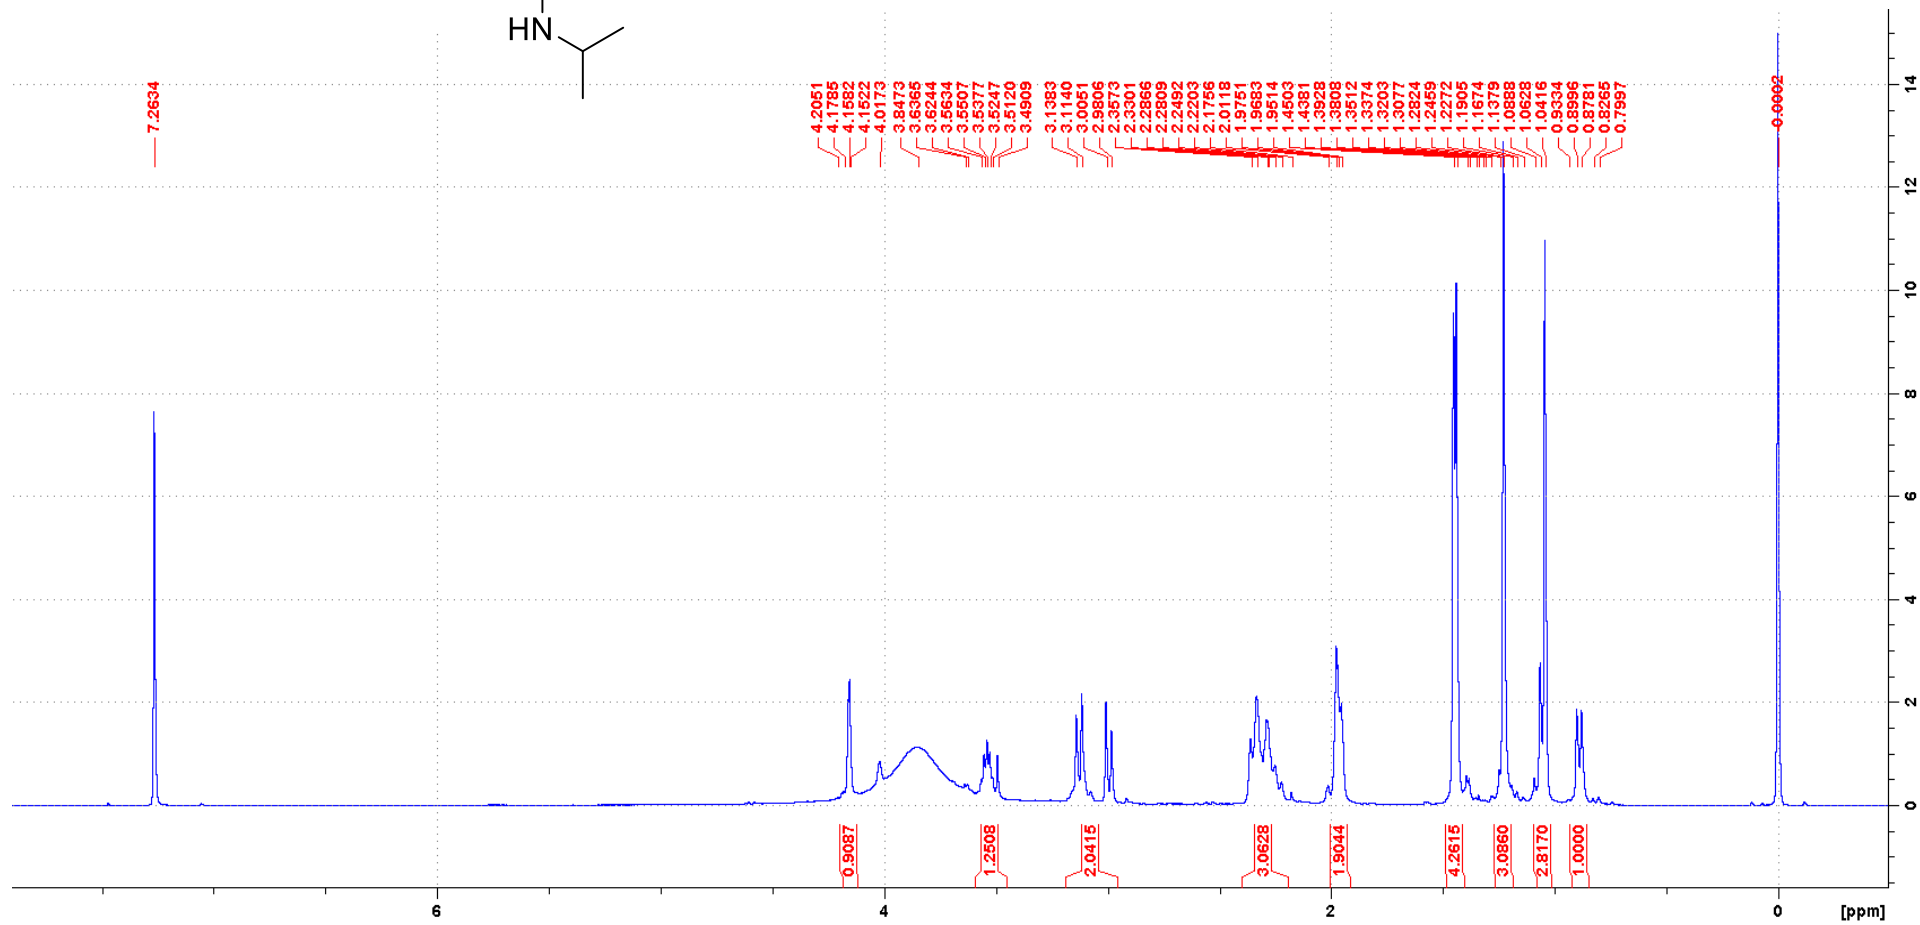

$^{13}\text{C}$ -NMR for compound **9**

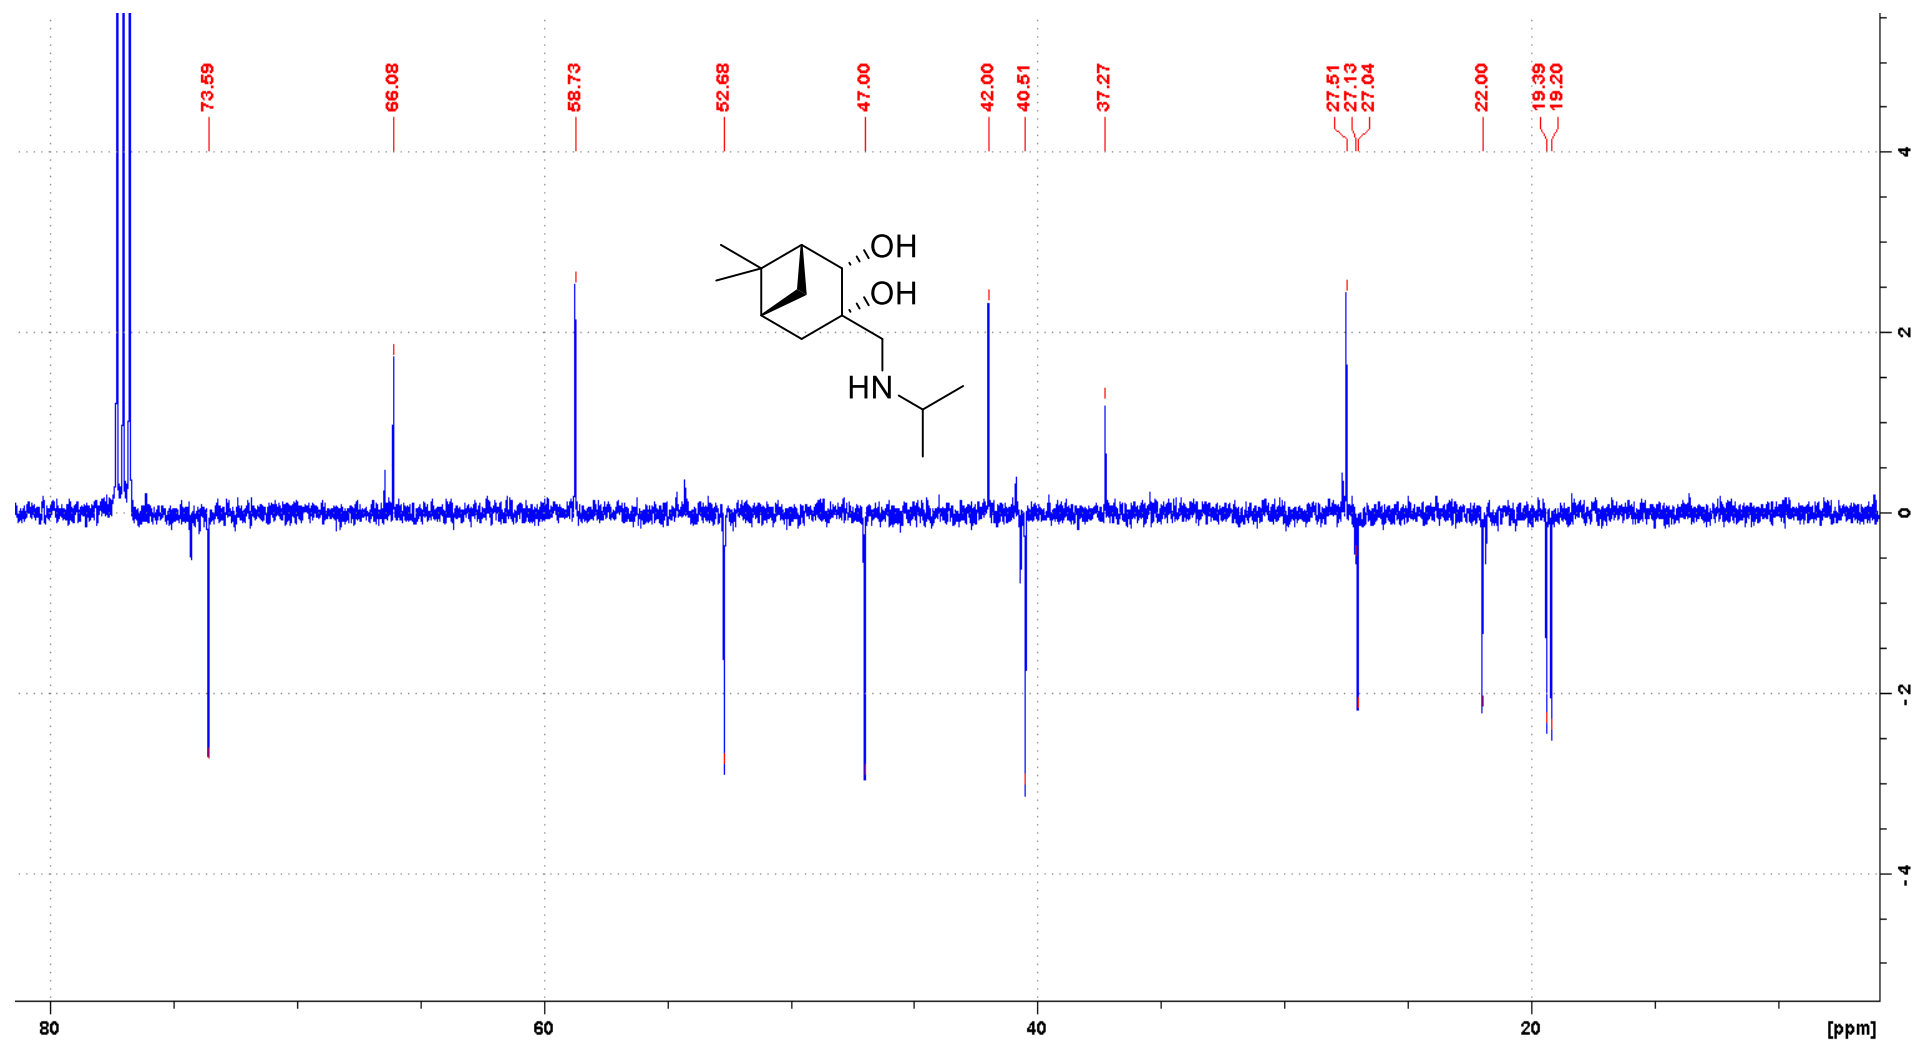

HSQC for compound **9**

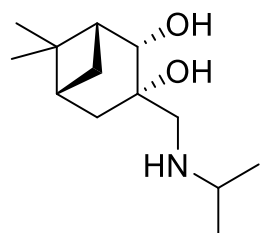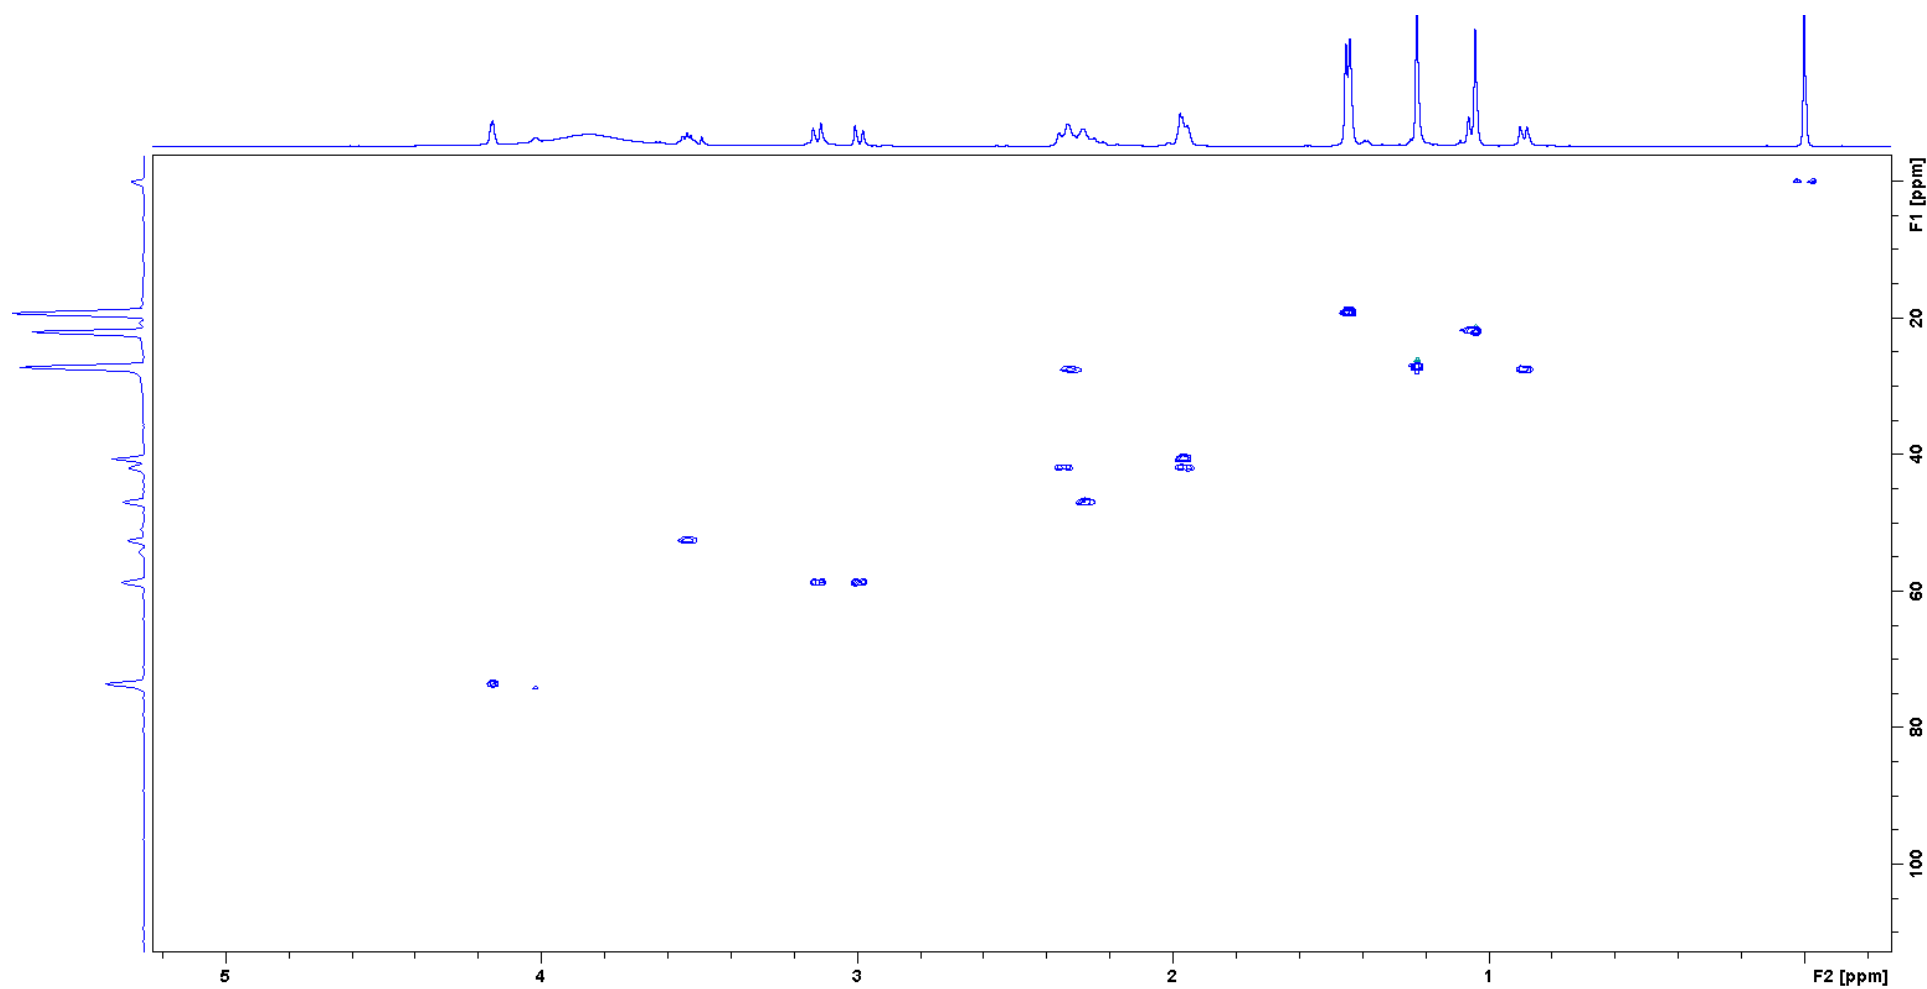



HMBC for compound **9**

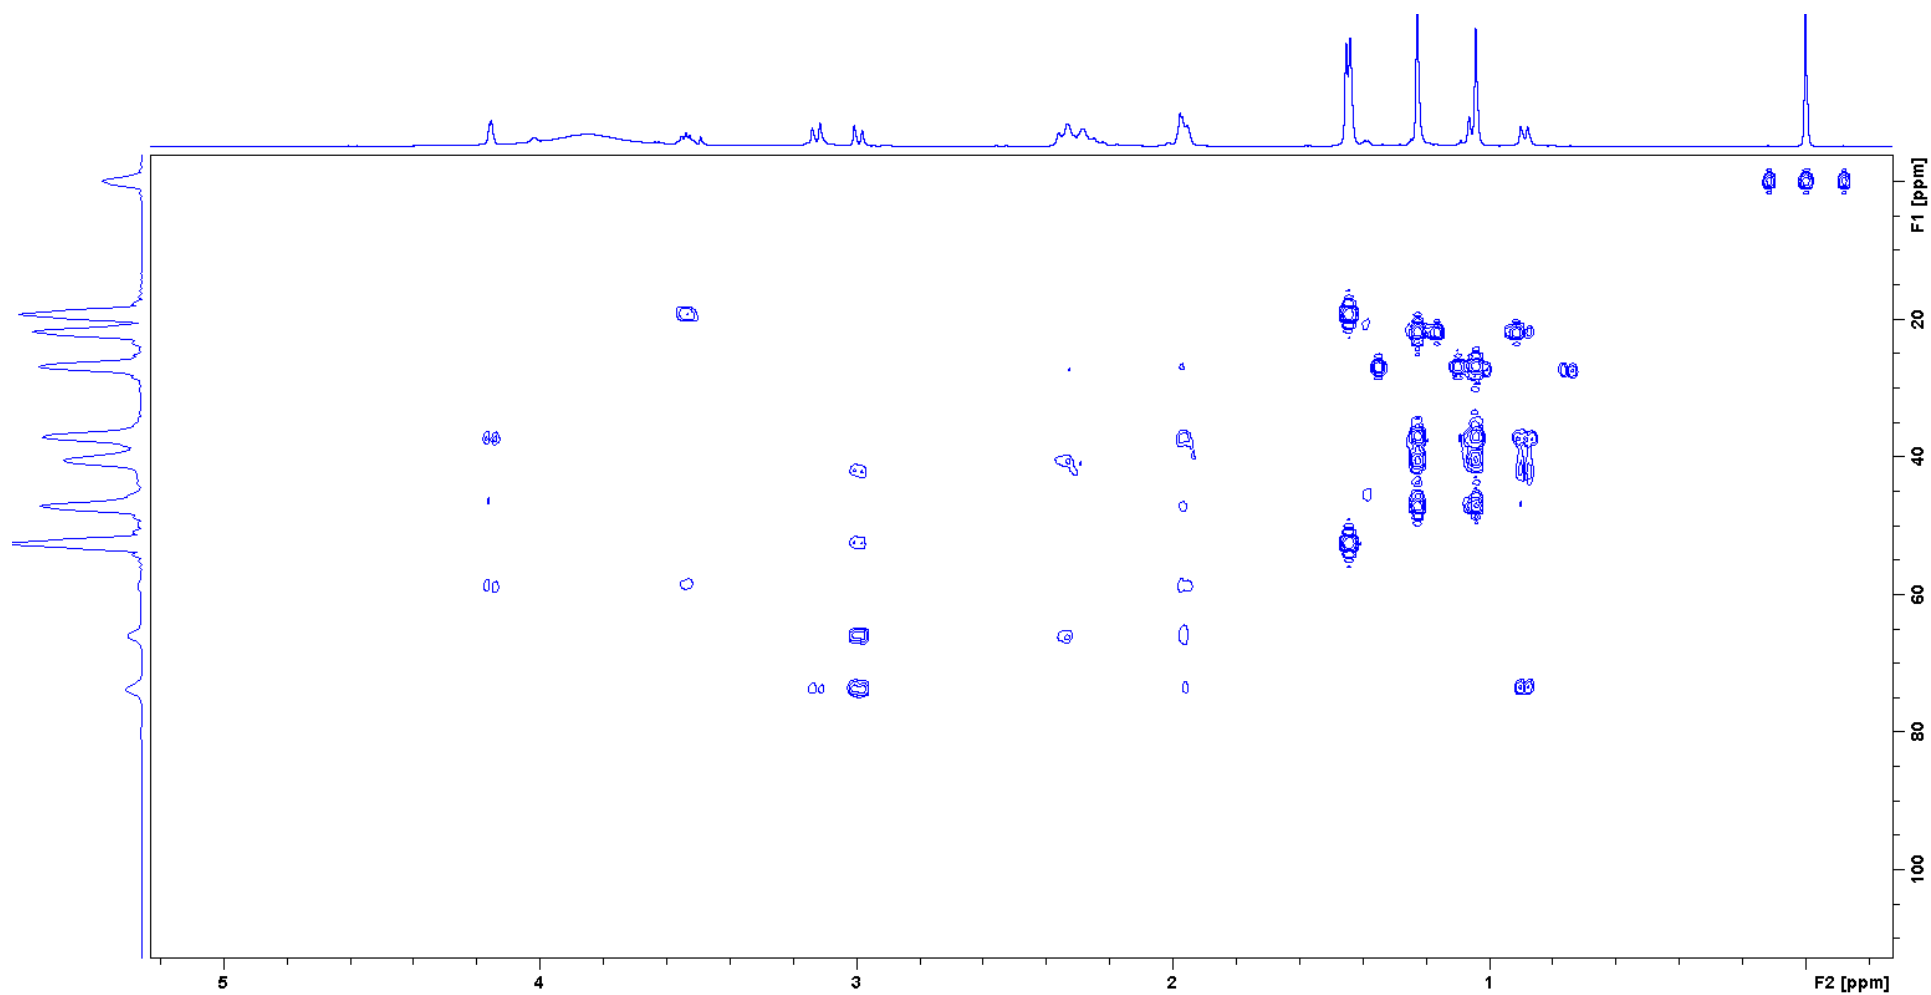

COSY for compound **9**

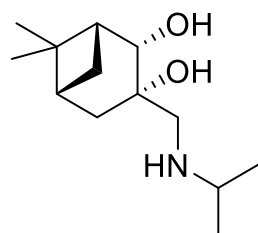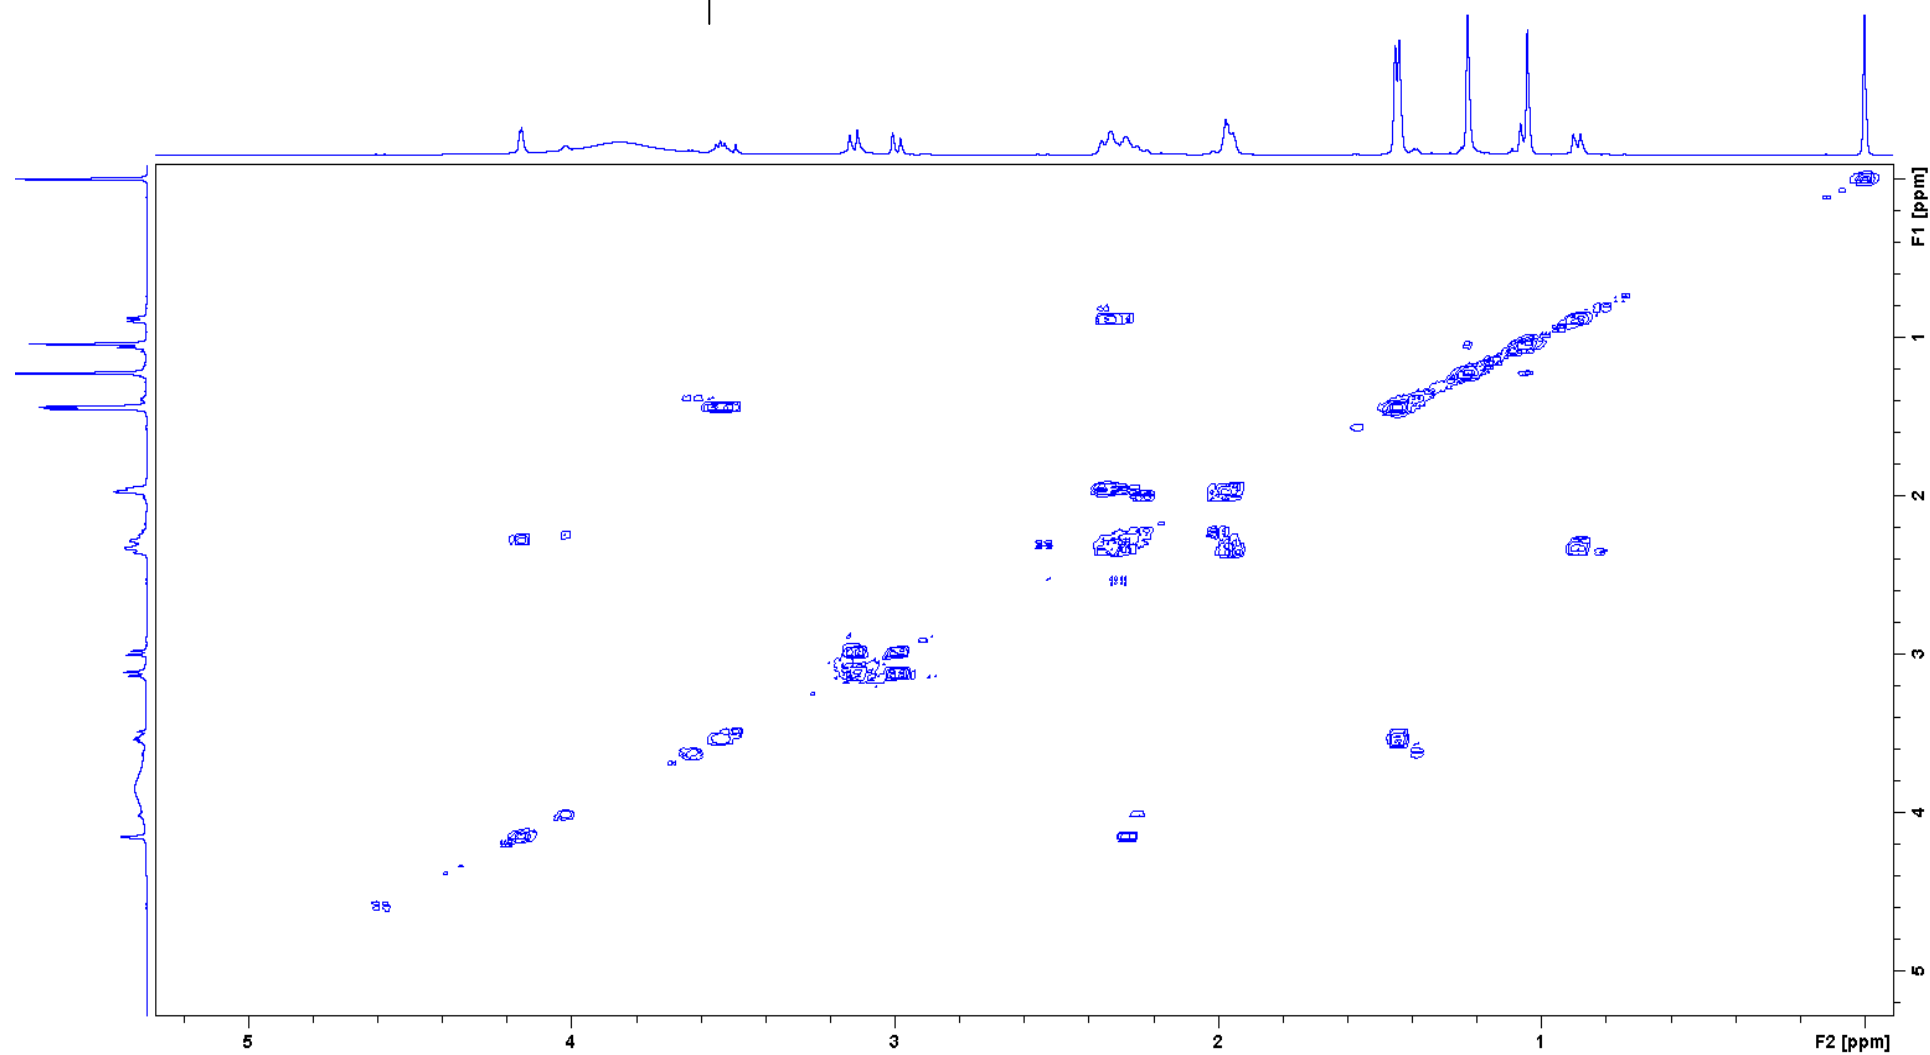

NOESY for compound **9**

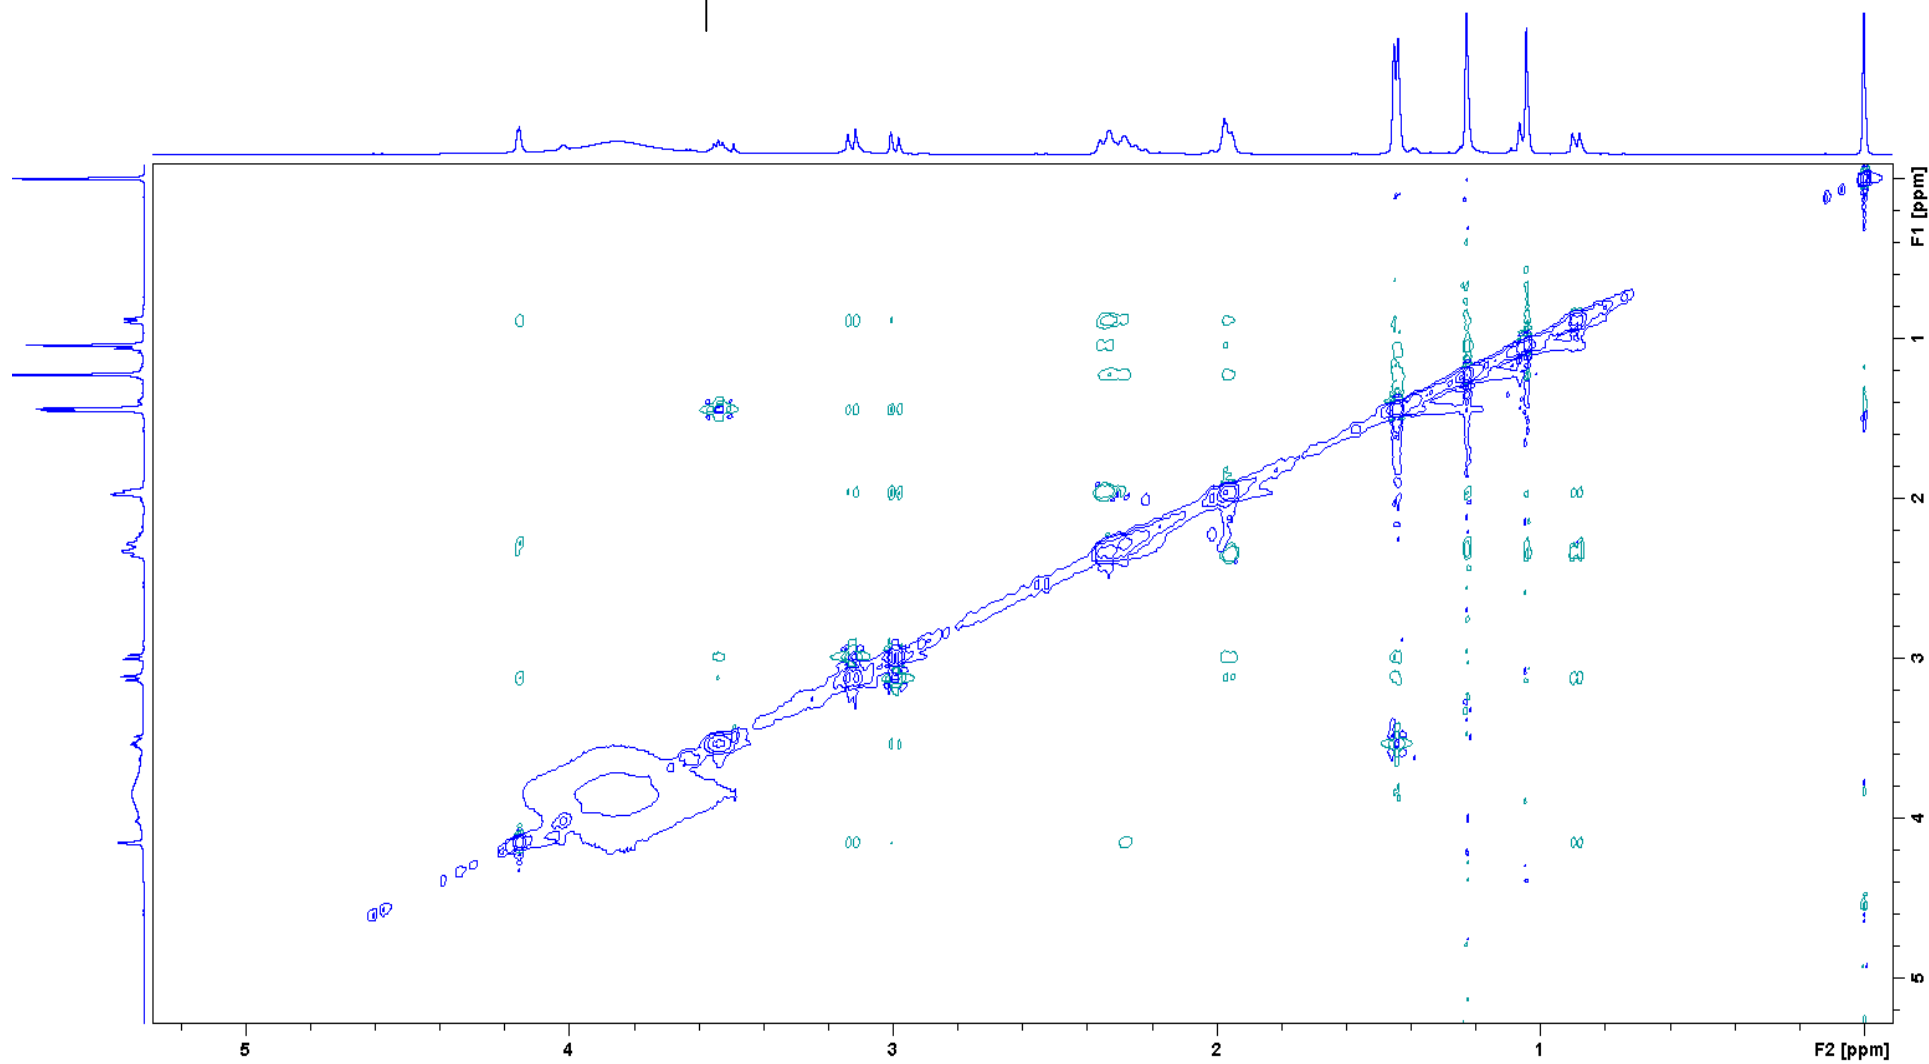

<sup>1</sup>H-NMR for compound **10**

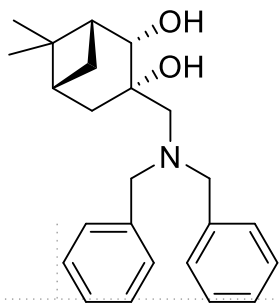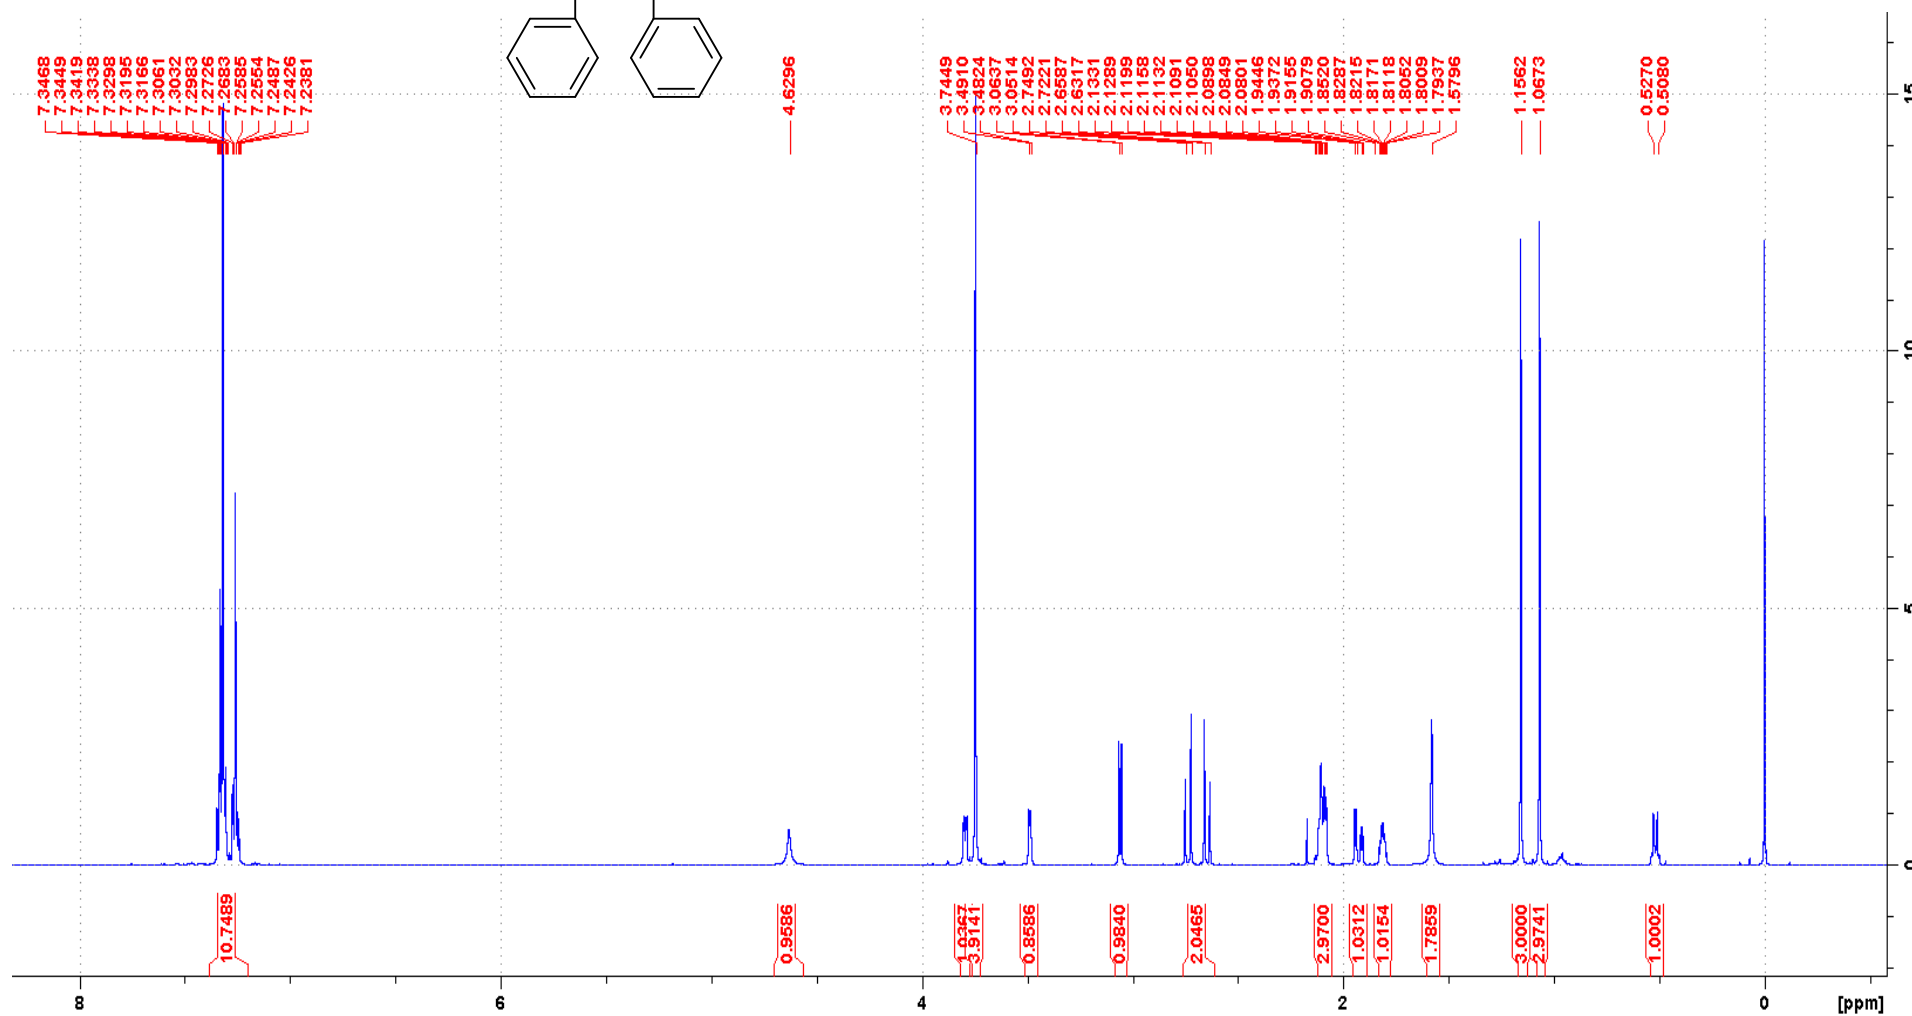

$^{13}\text{C}$ -NMR for compound **10**

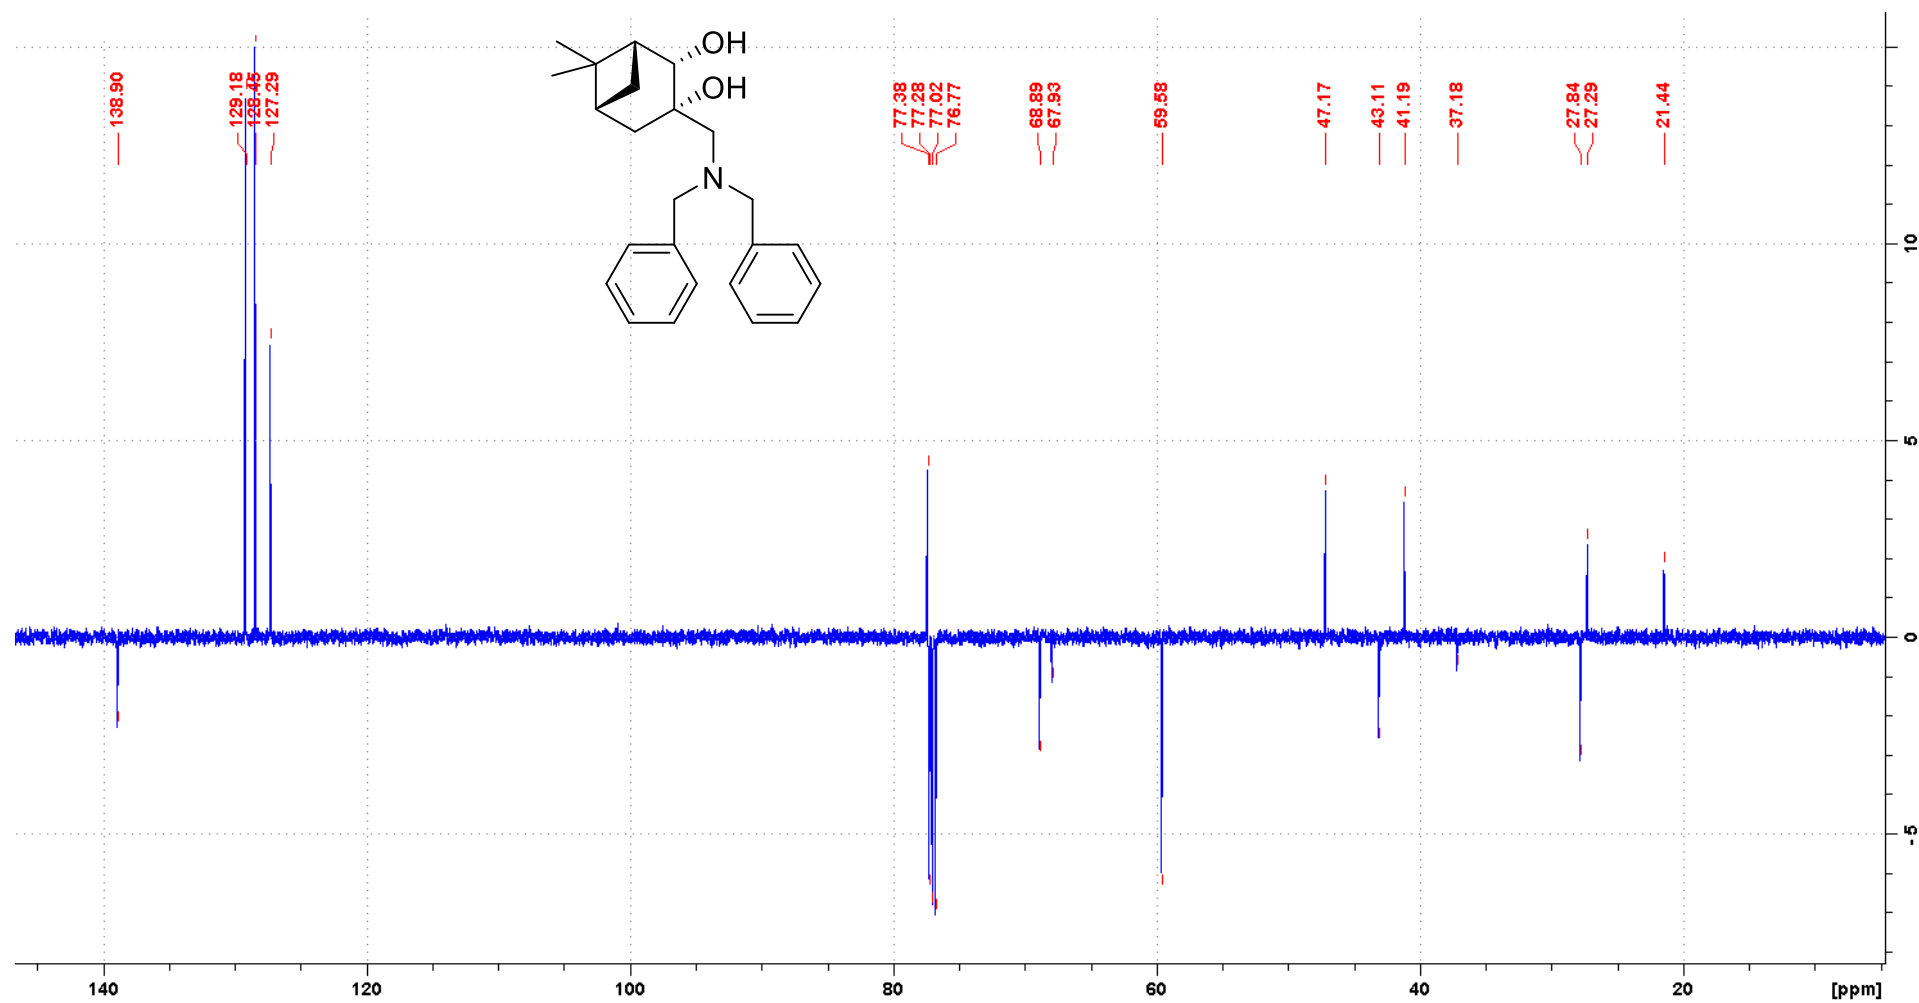

HSQC for compound **10**

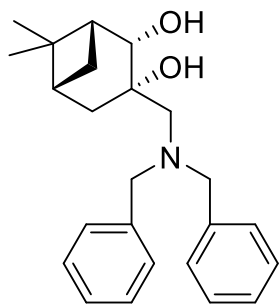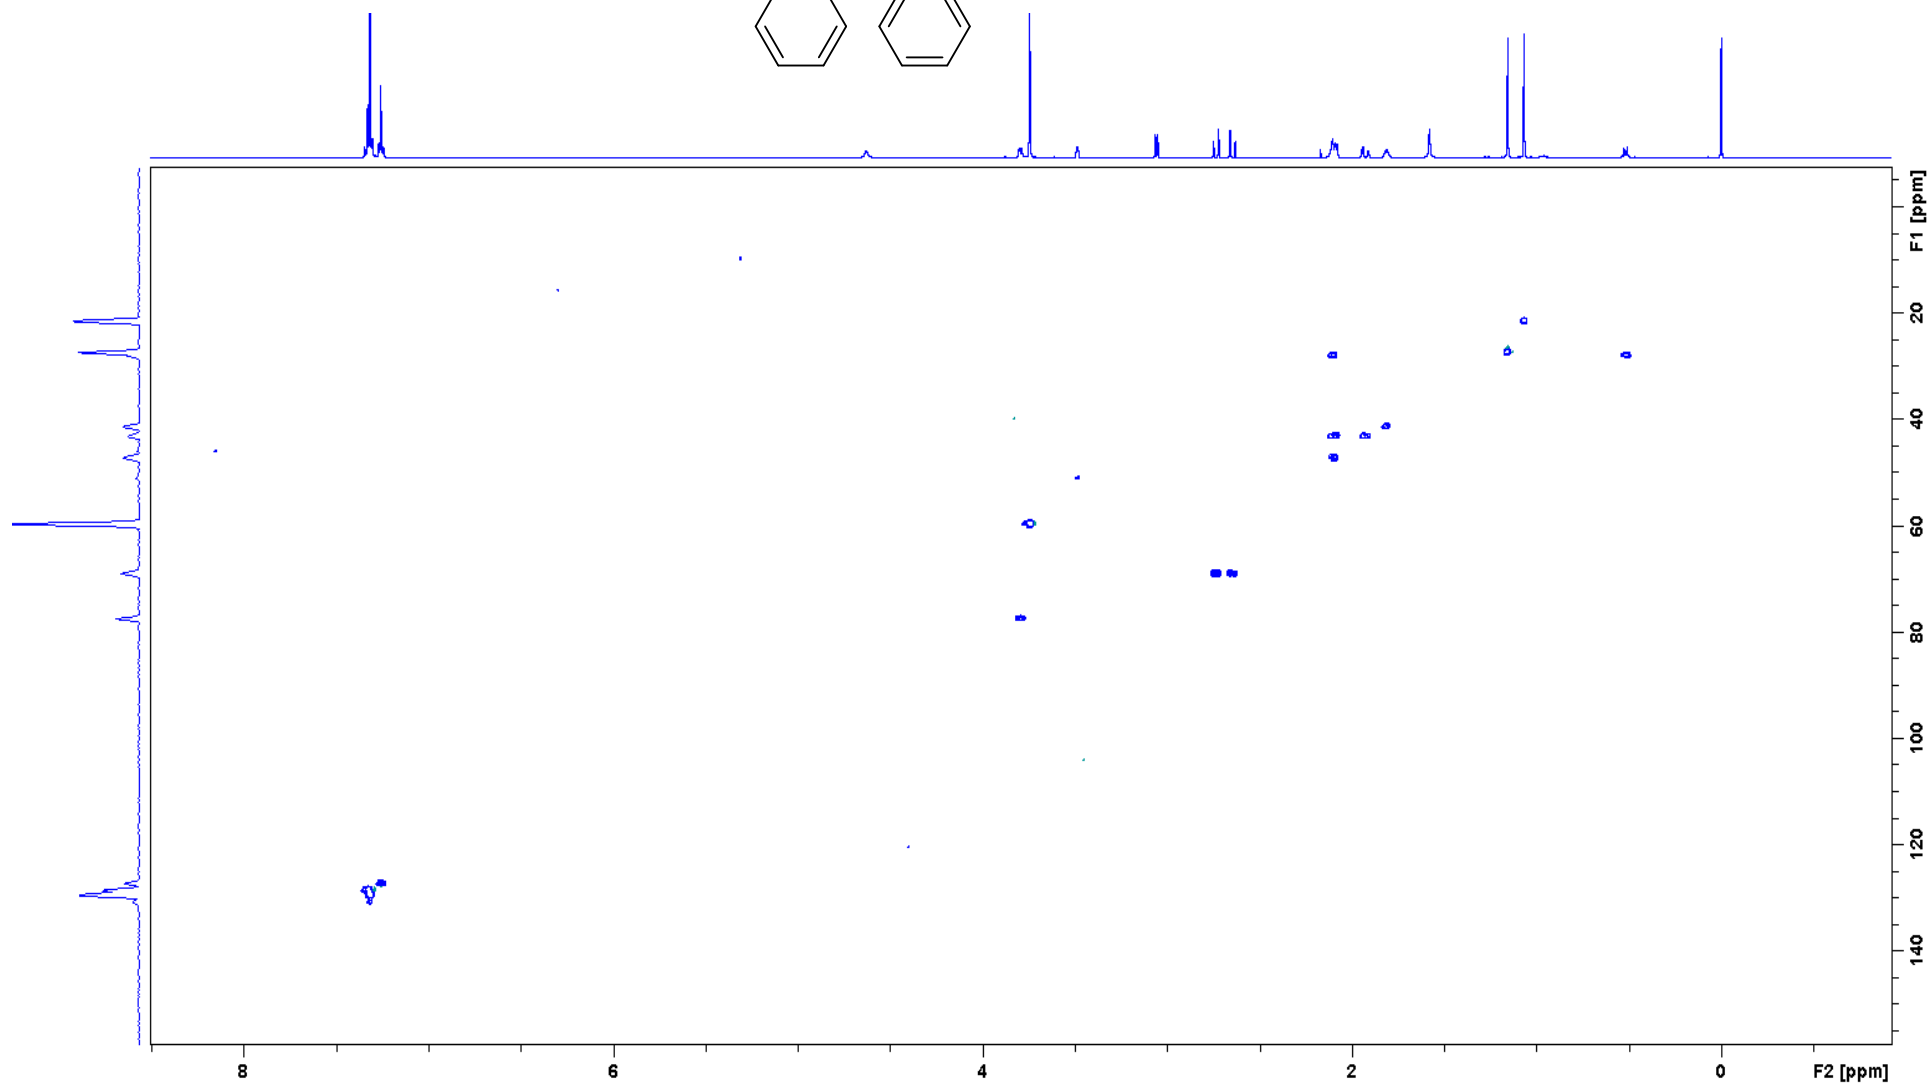

HMBC for compound **10**

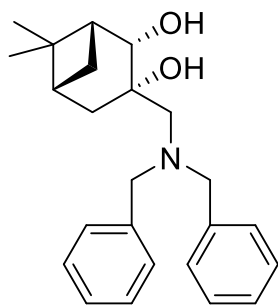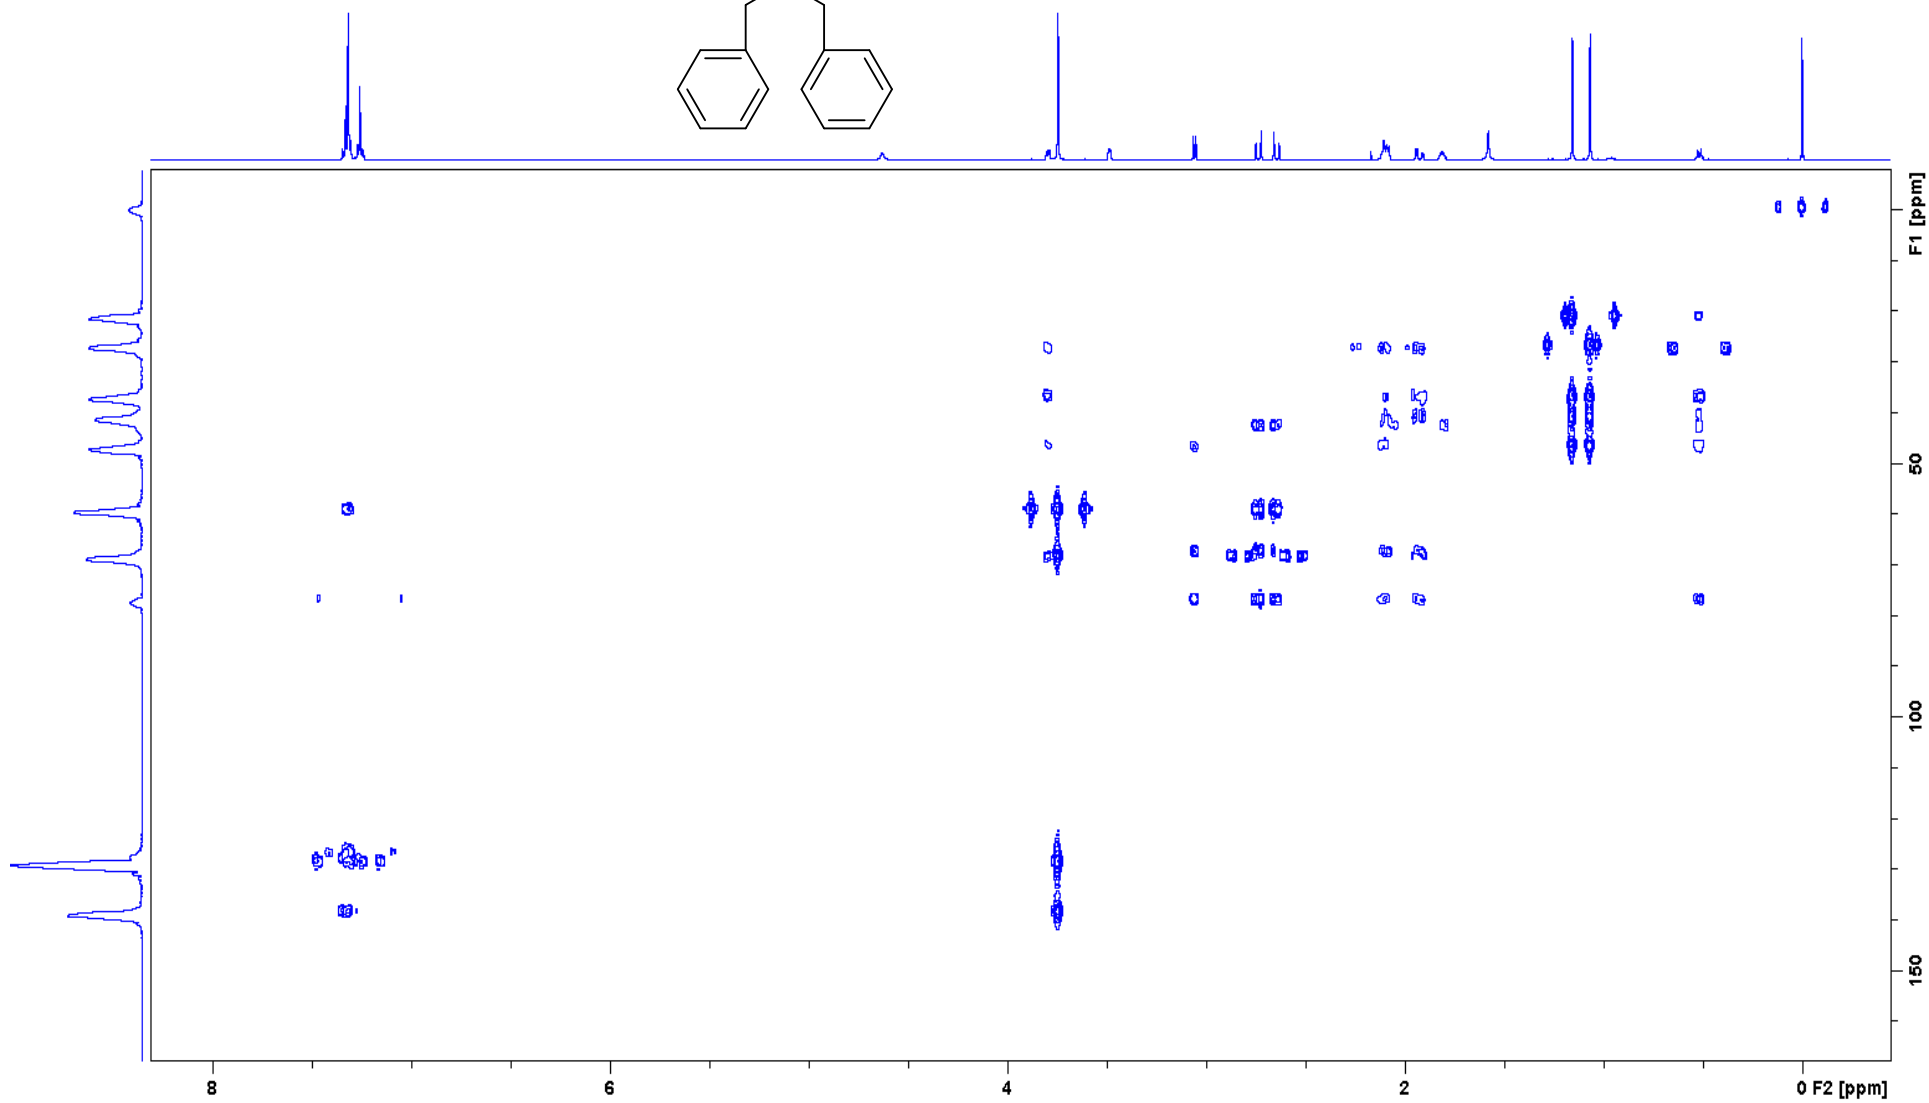

COSY for compound **10**

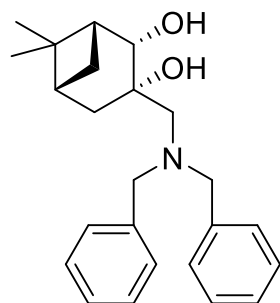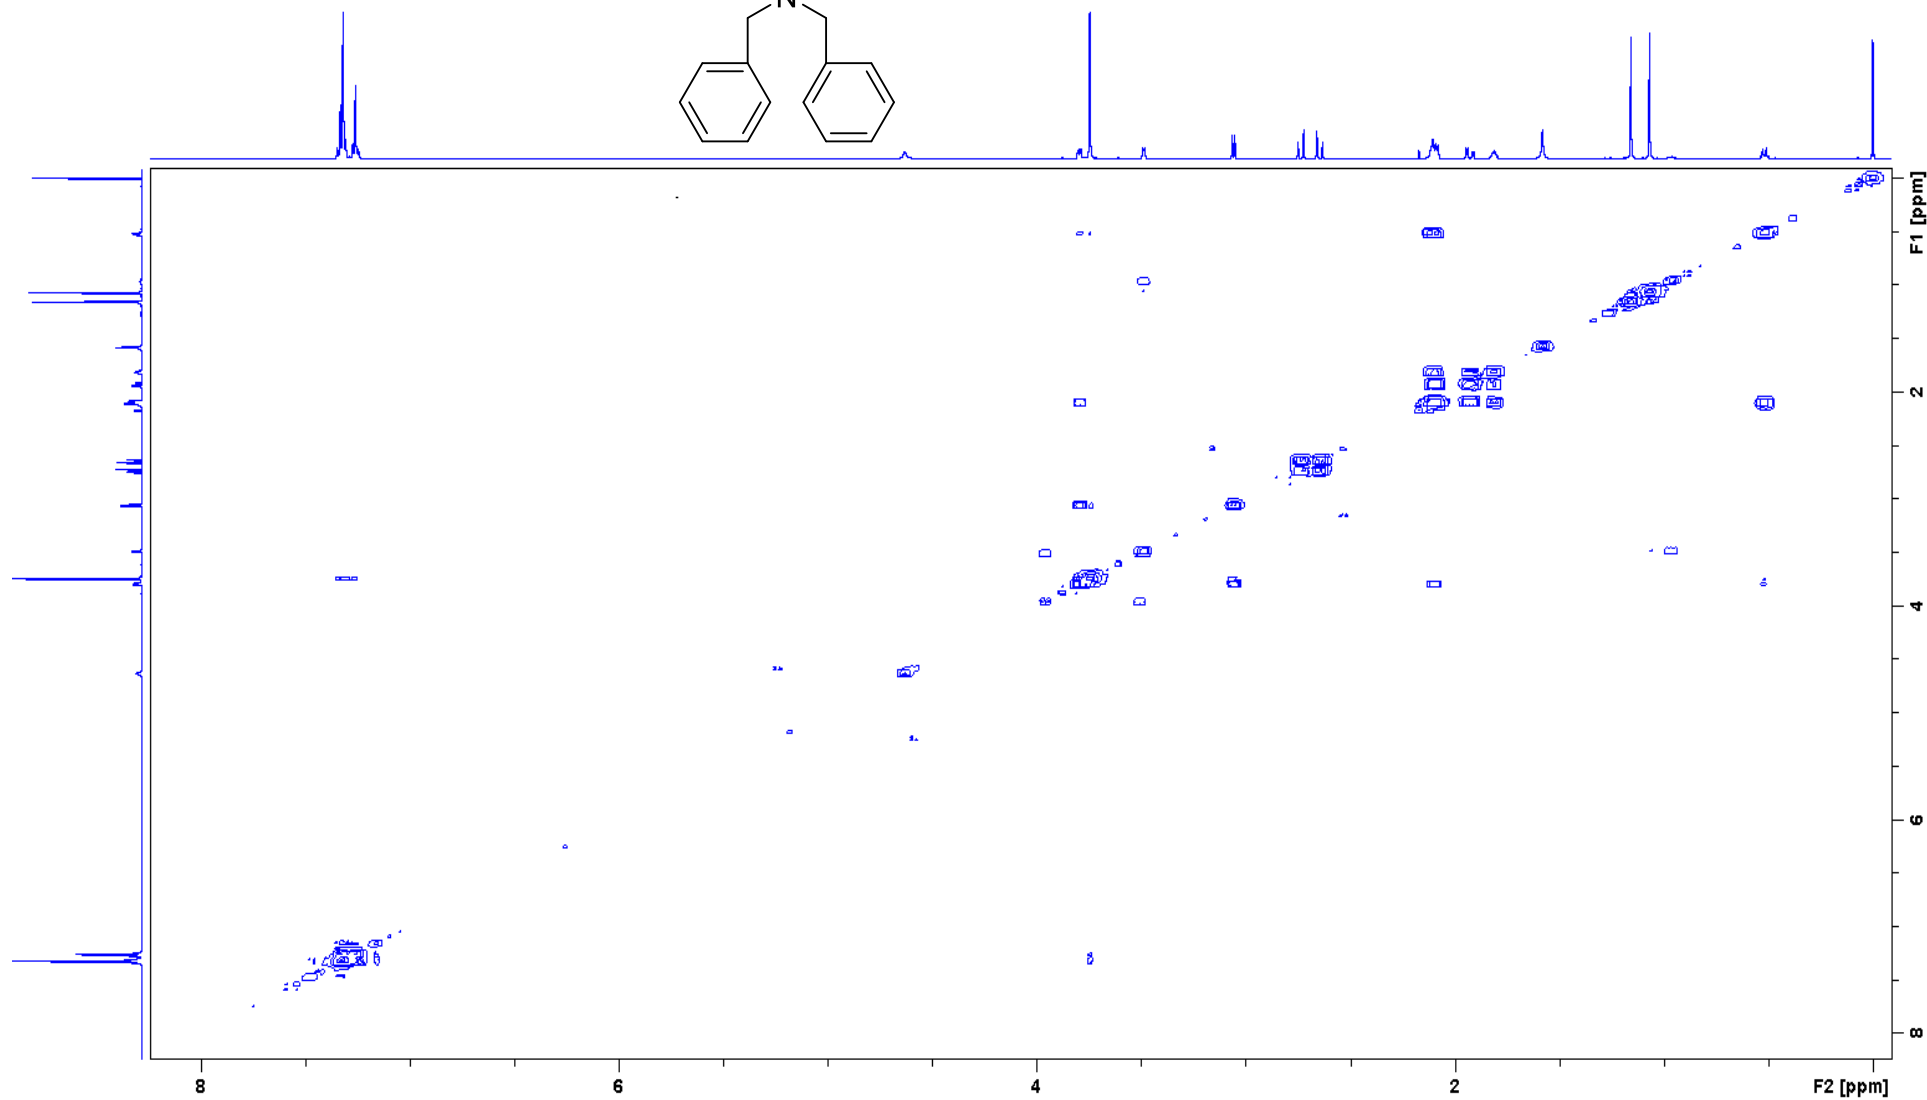



NOESY for compound **10**

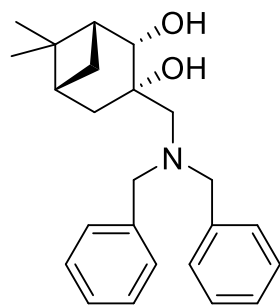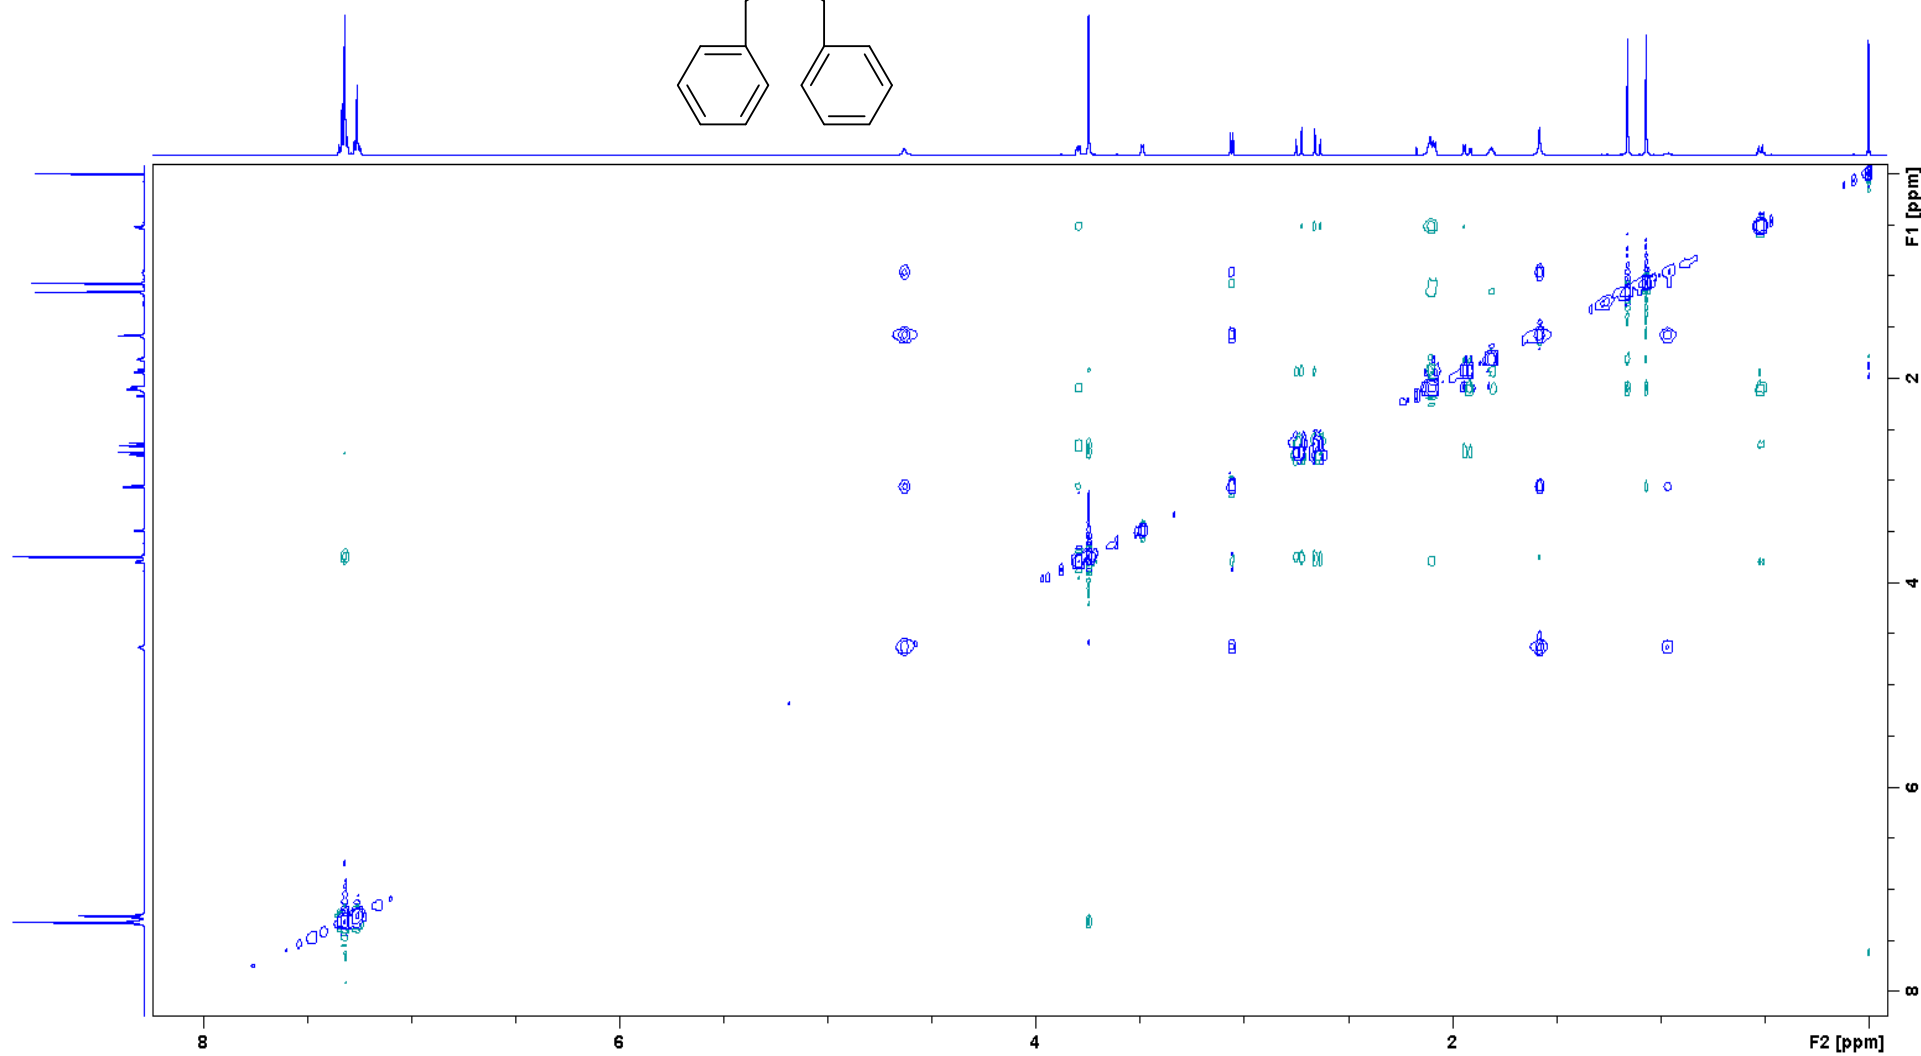

<sup>1</sup>H-NMR for compound **11**

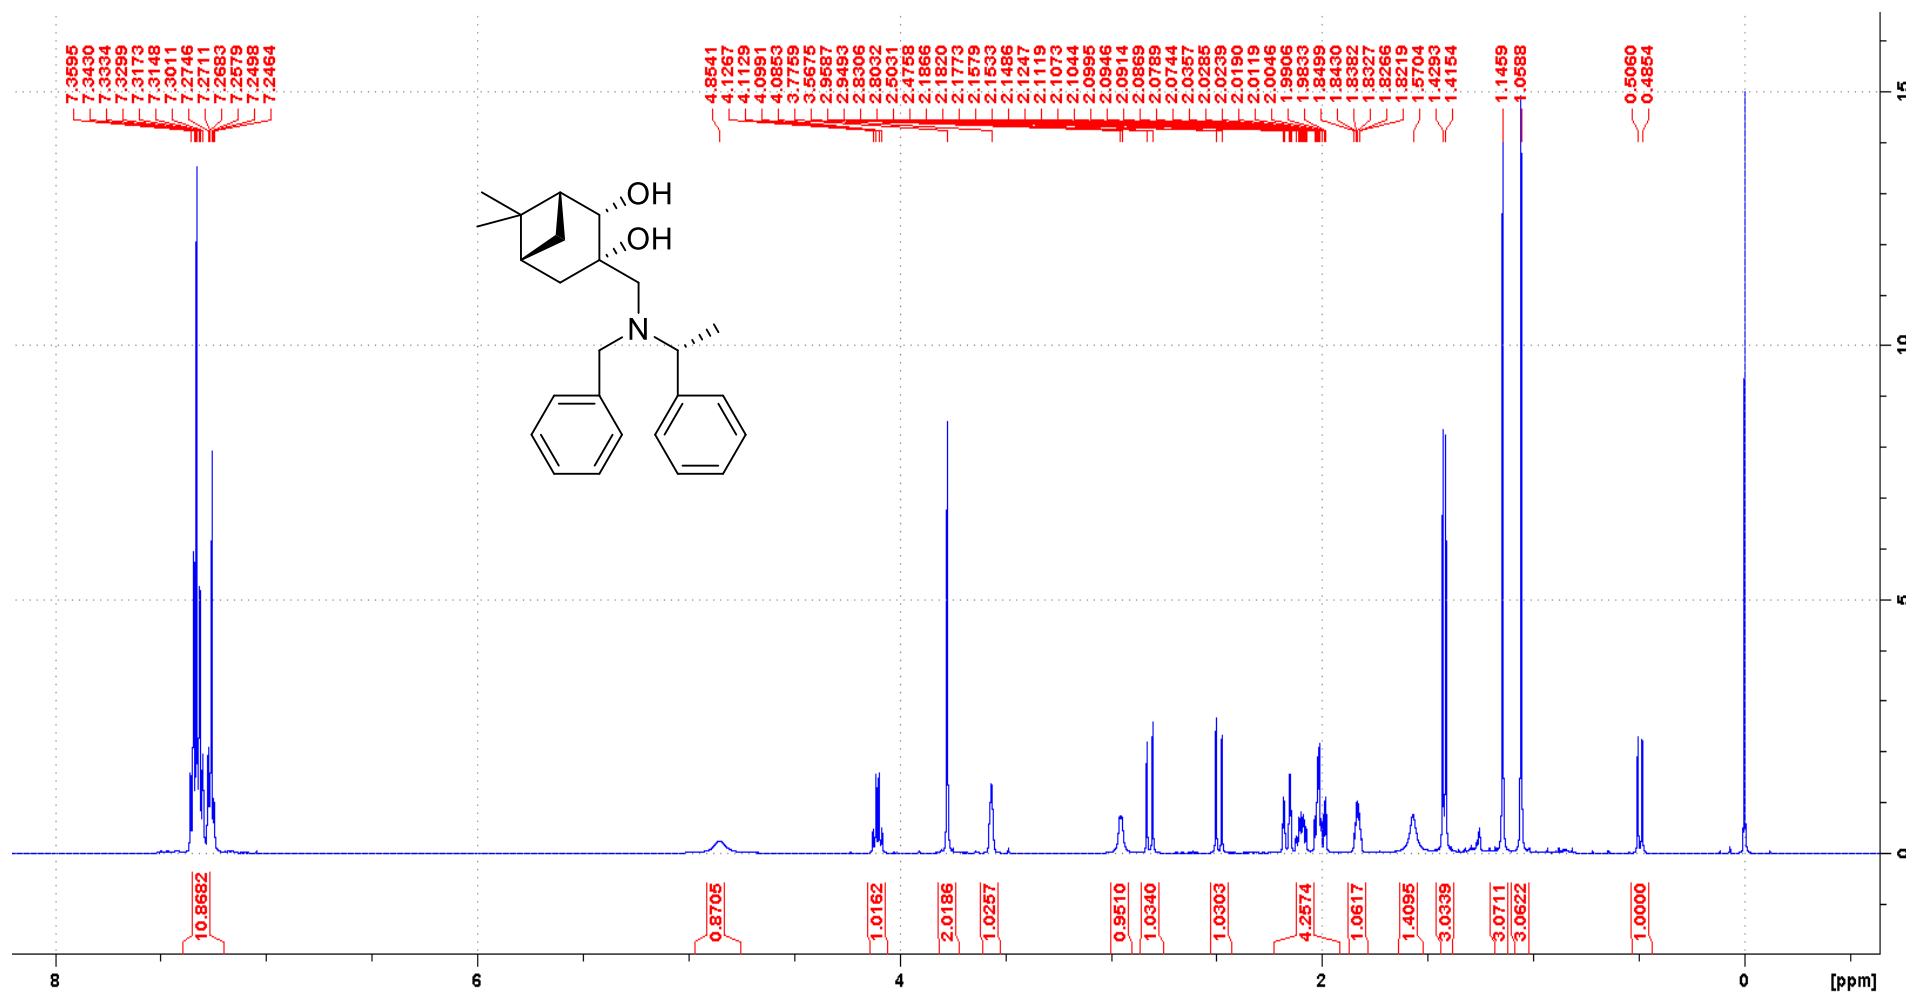

$^{13}\text{C}$ -NMR for compound **11**

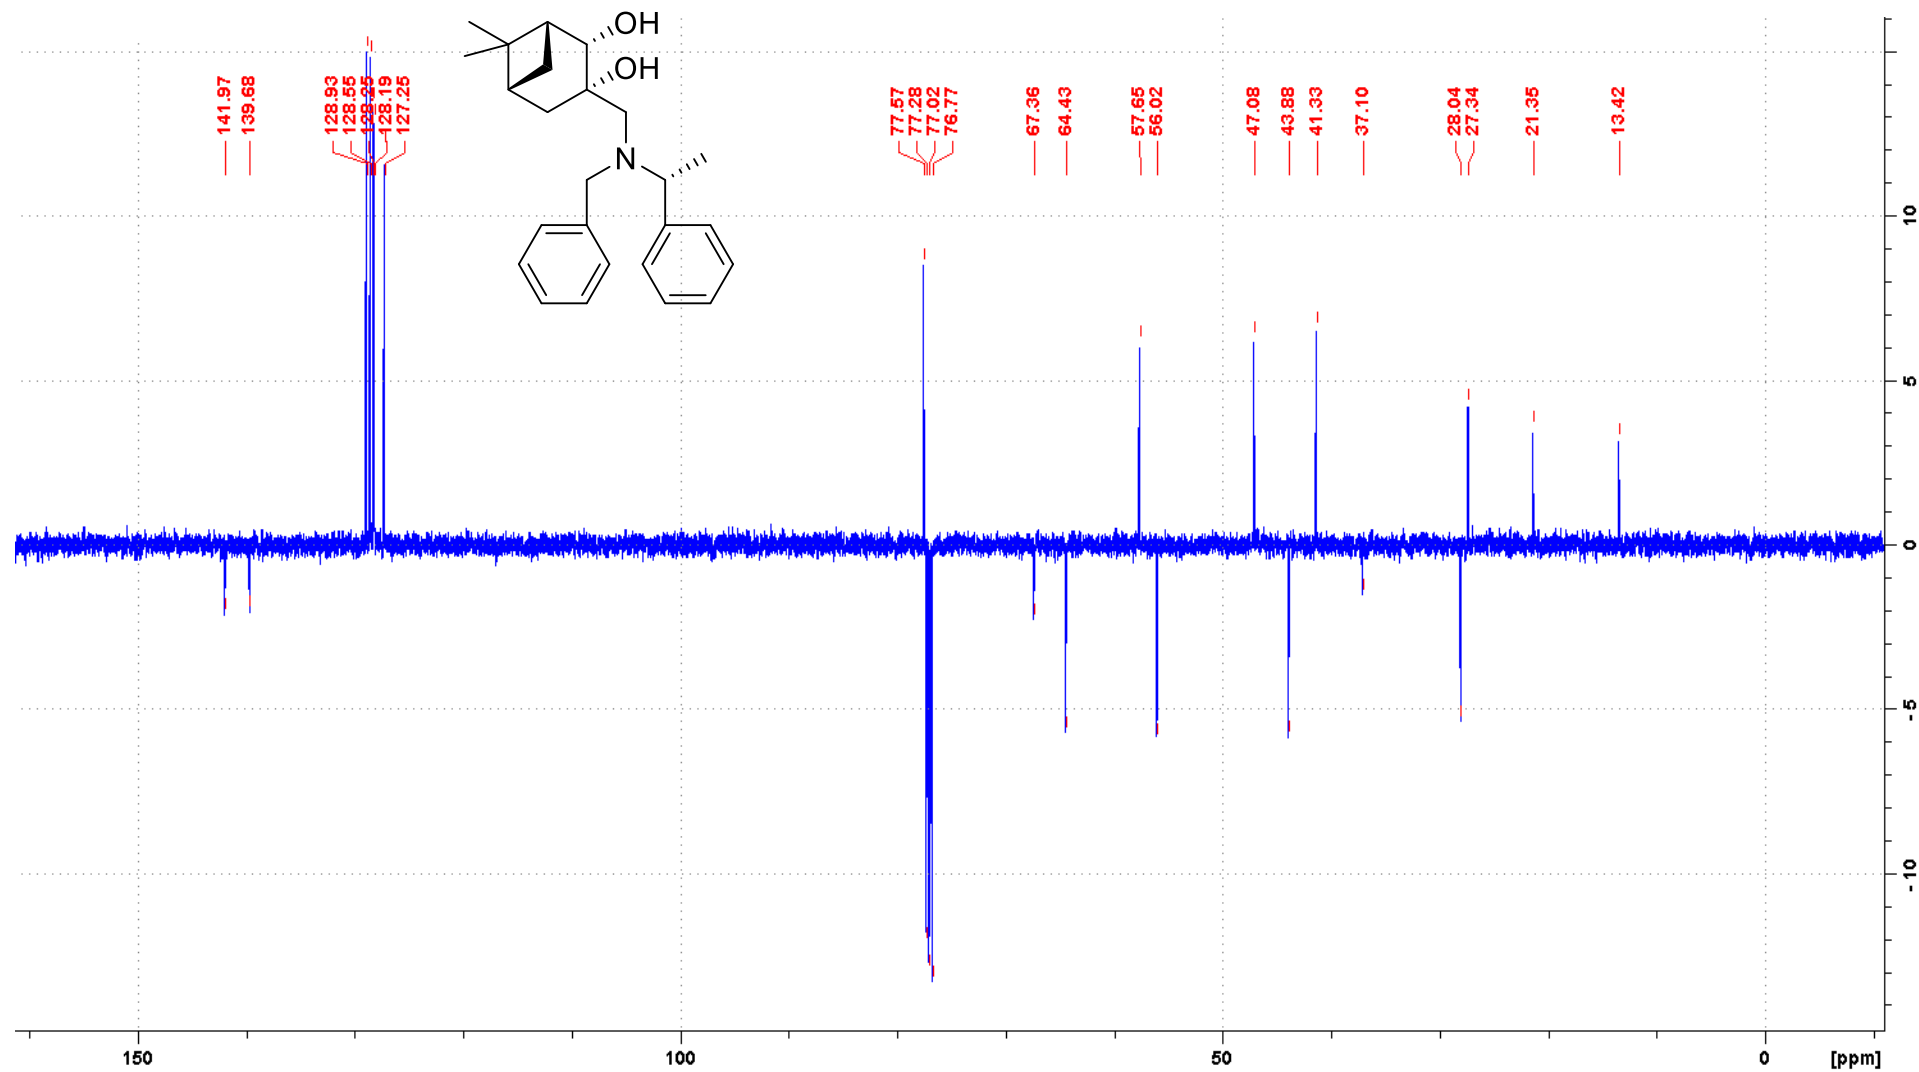

<sup>1</sup>H-NMR for compound **12**

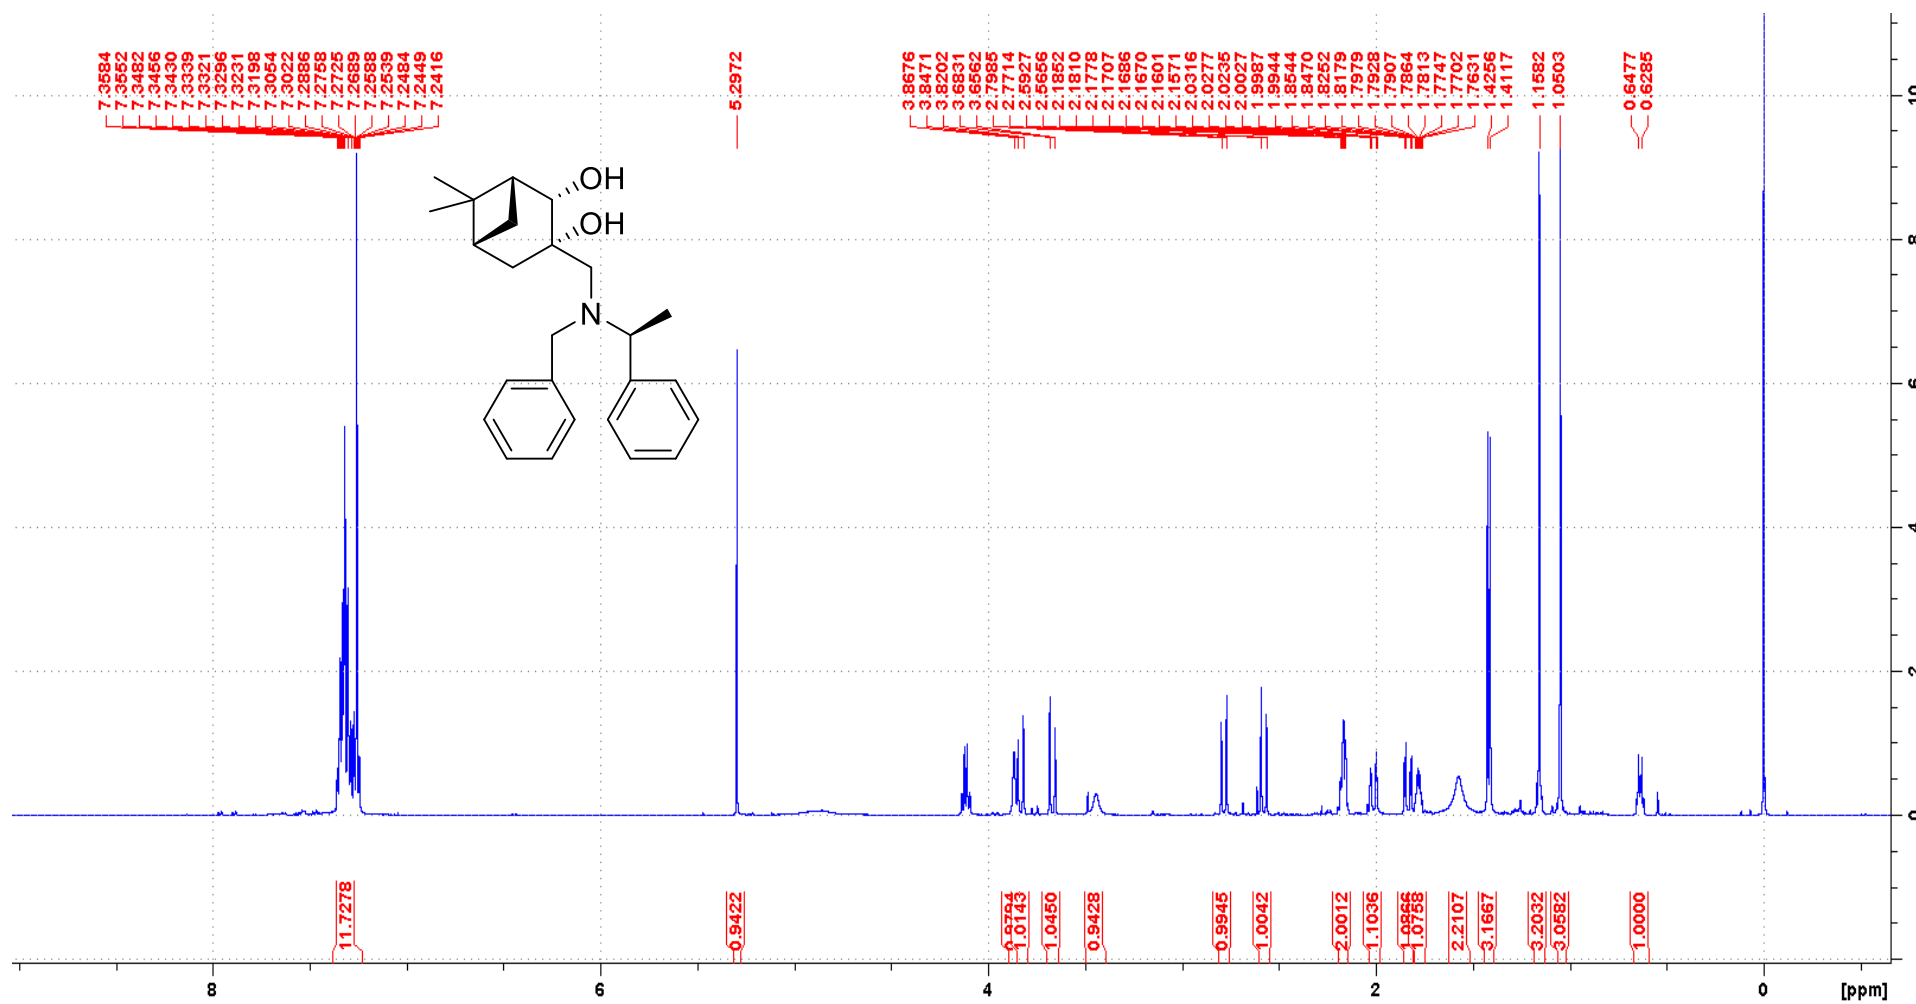

$^{13}\text{C}$ -NMR for compound **12**

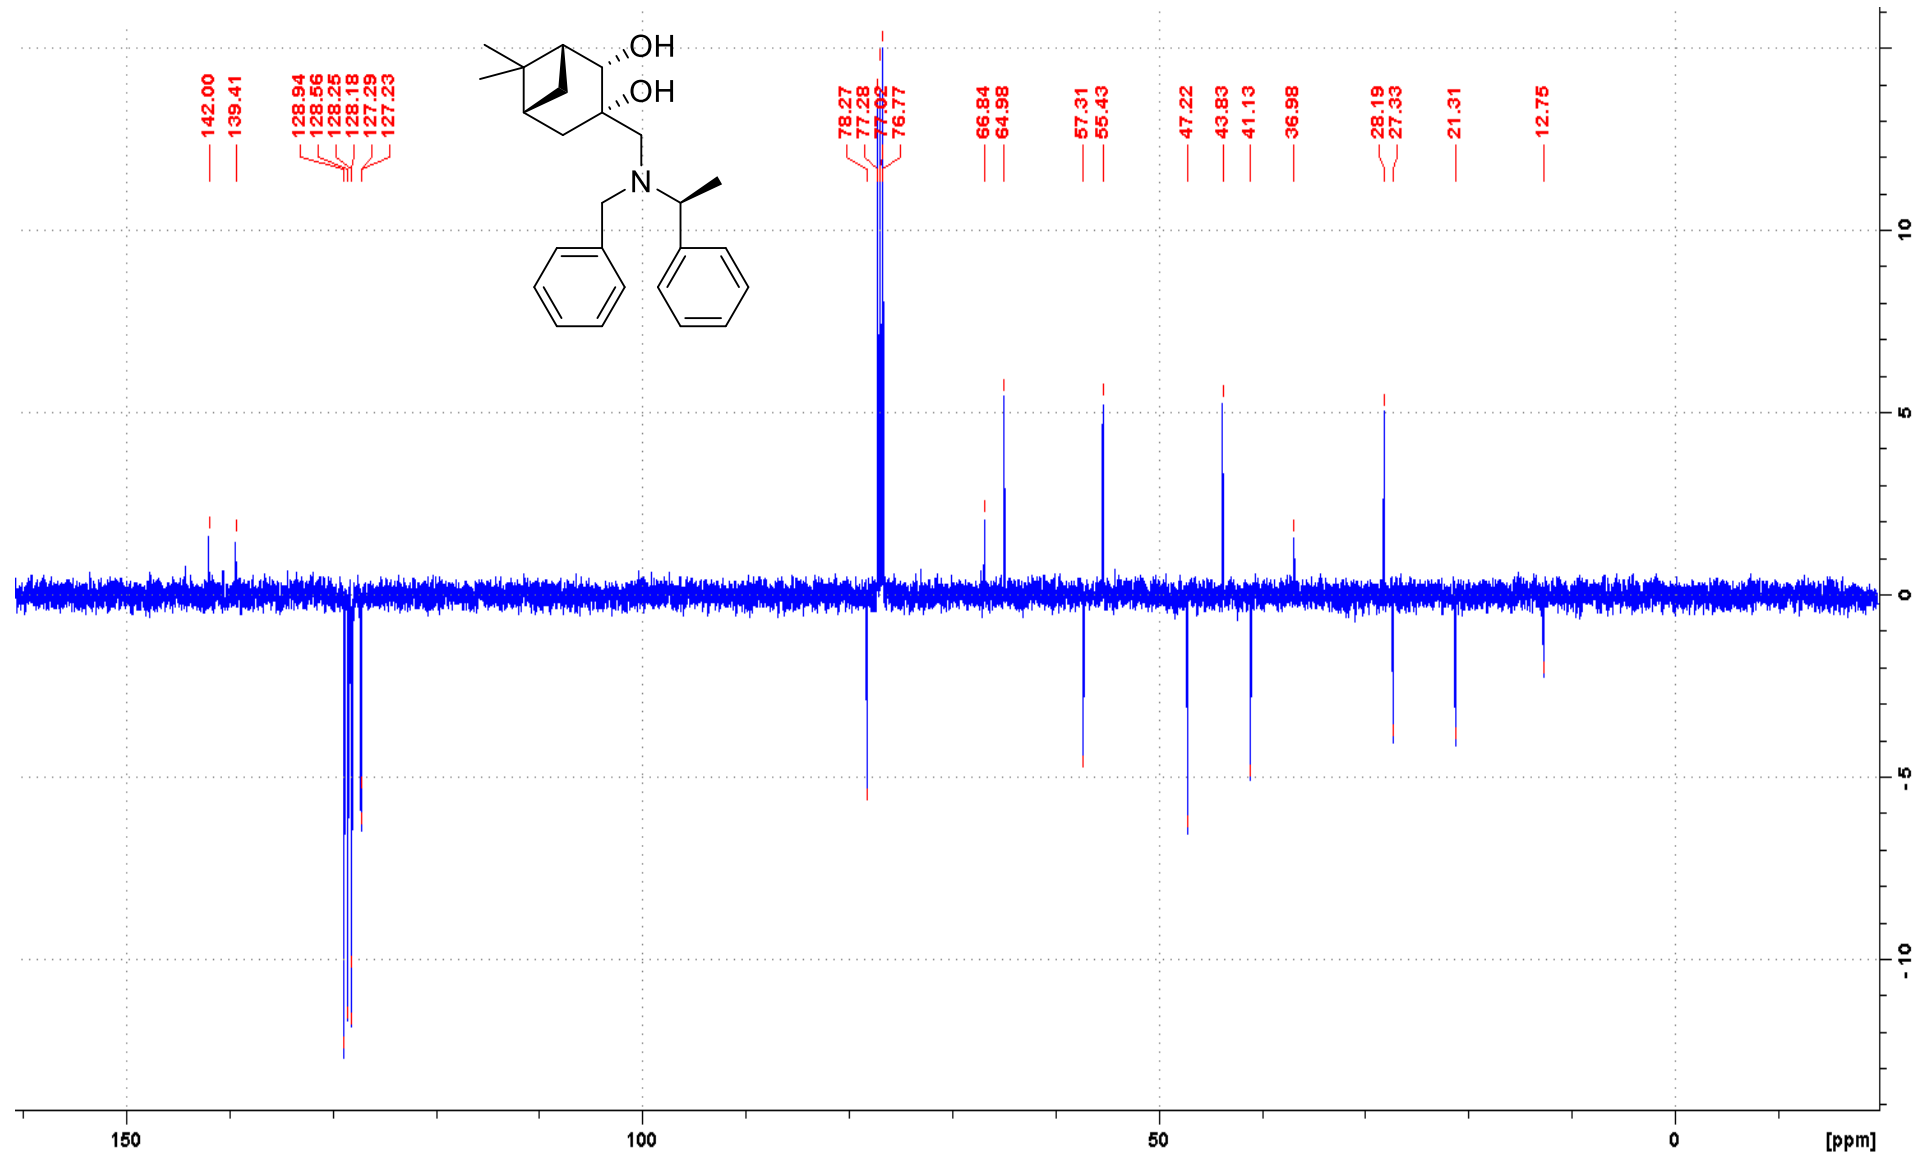

HSQC for compound **12**

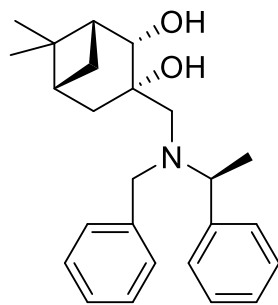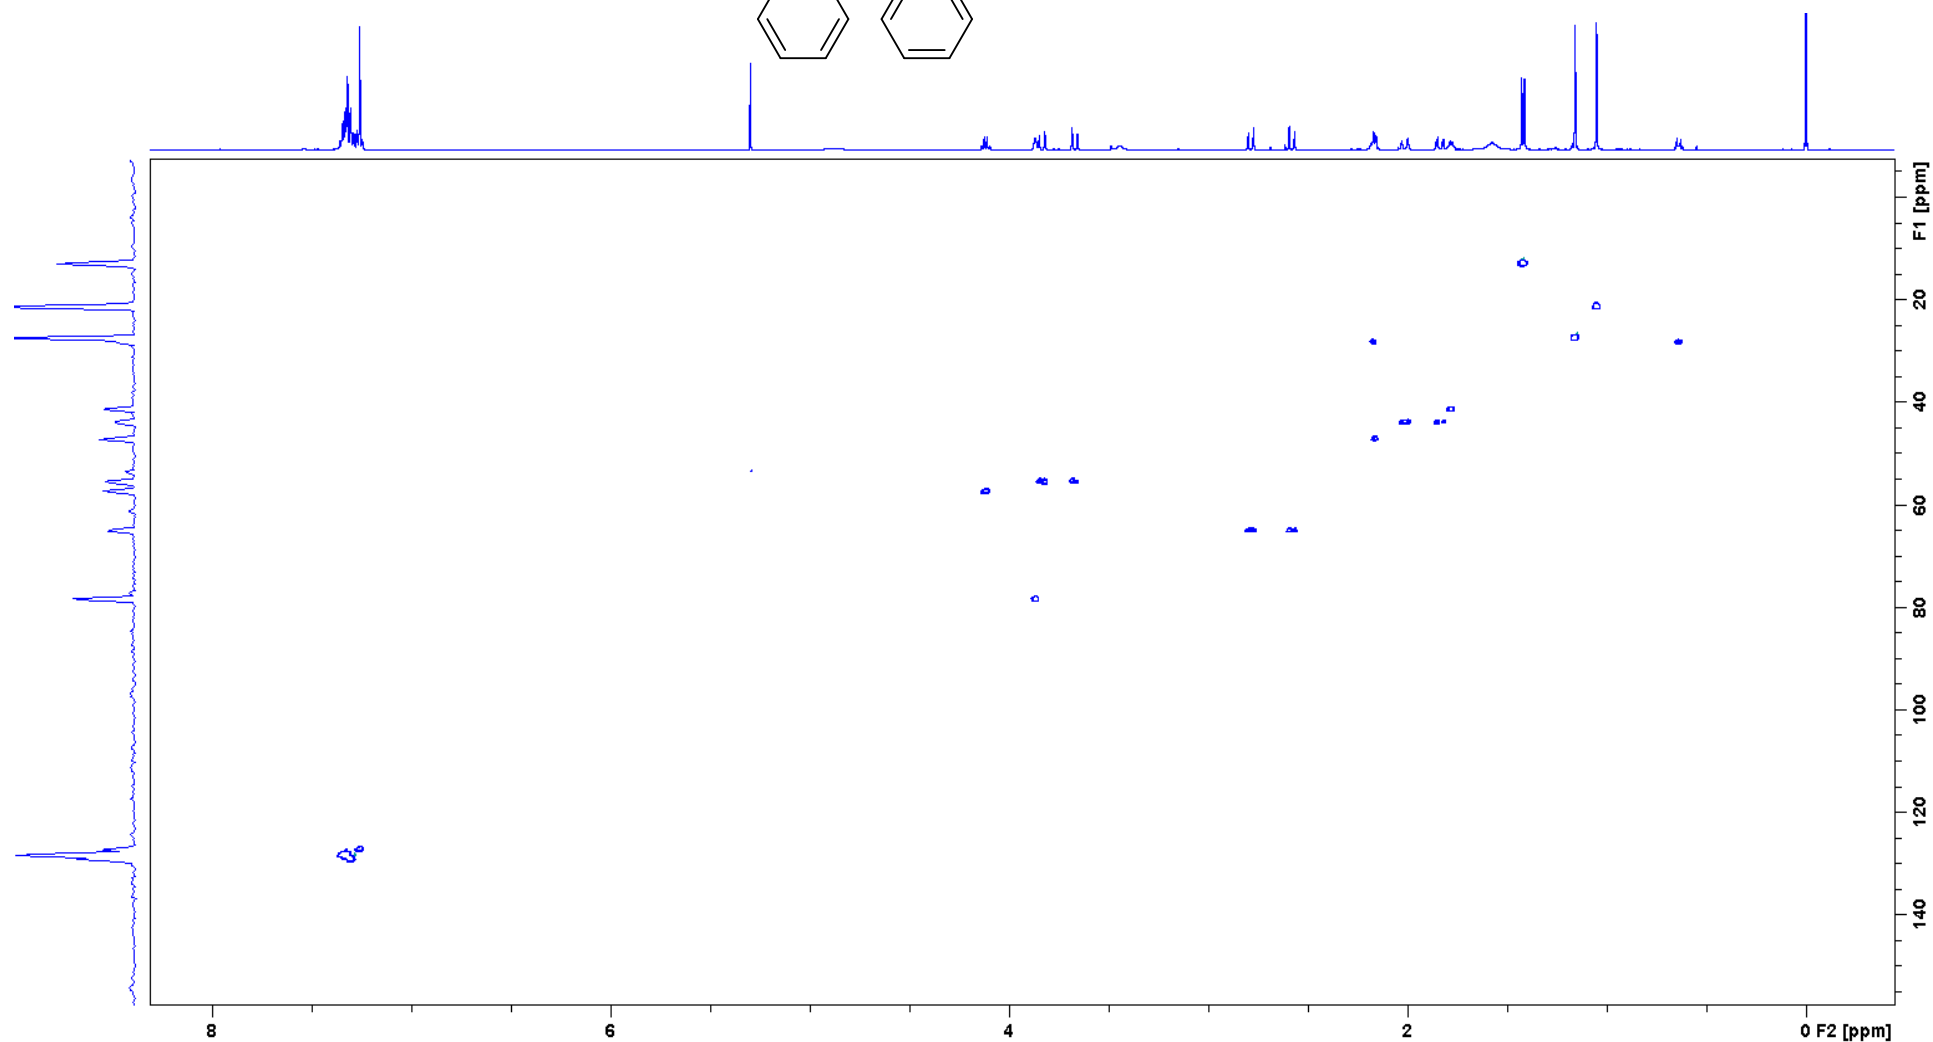

NOESY for compound **12**

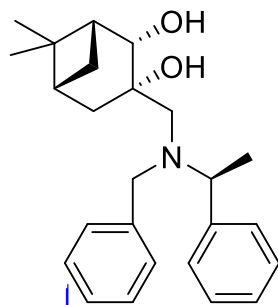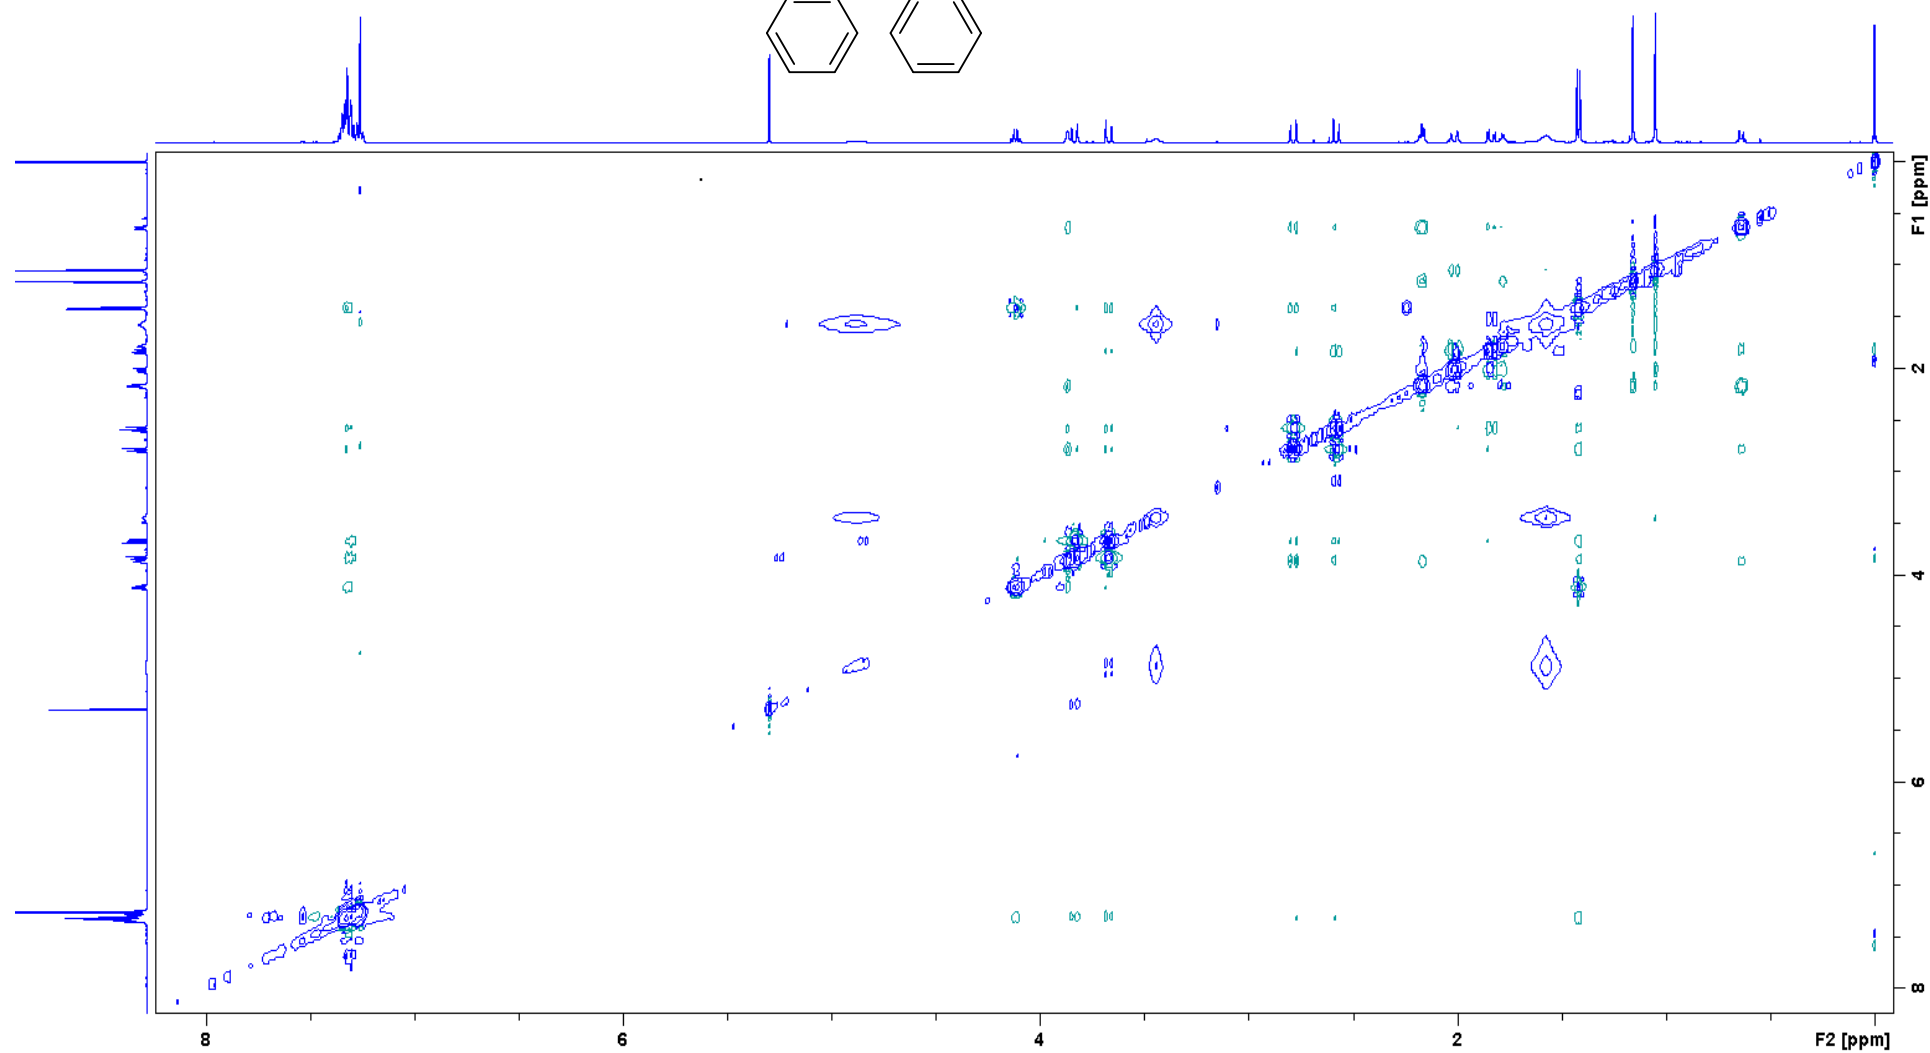

<sup>1</sup>H-NMR for compound **13**

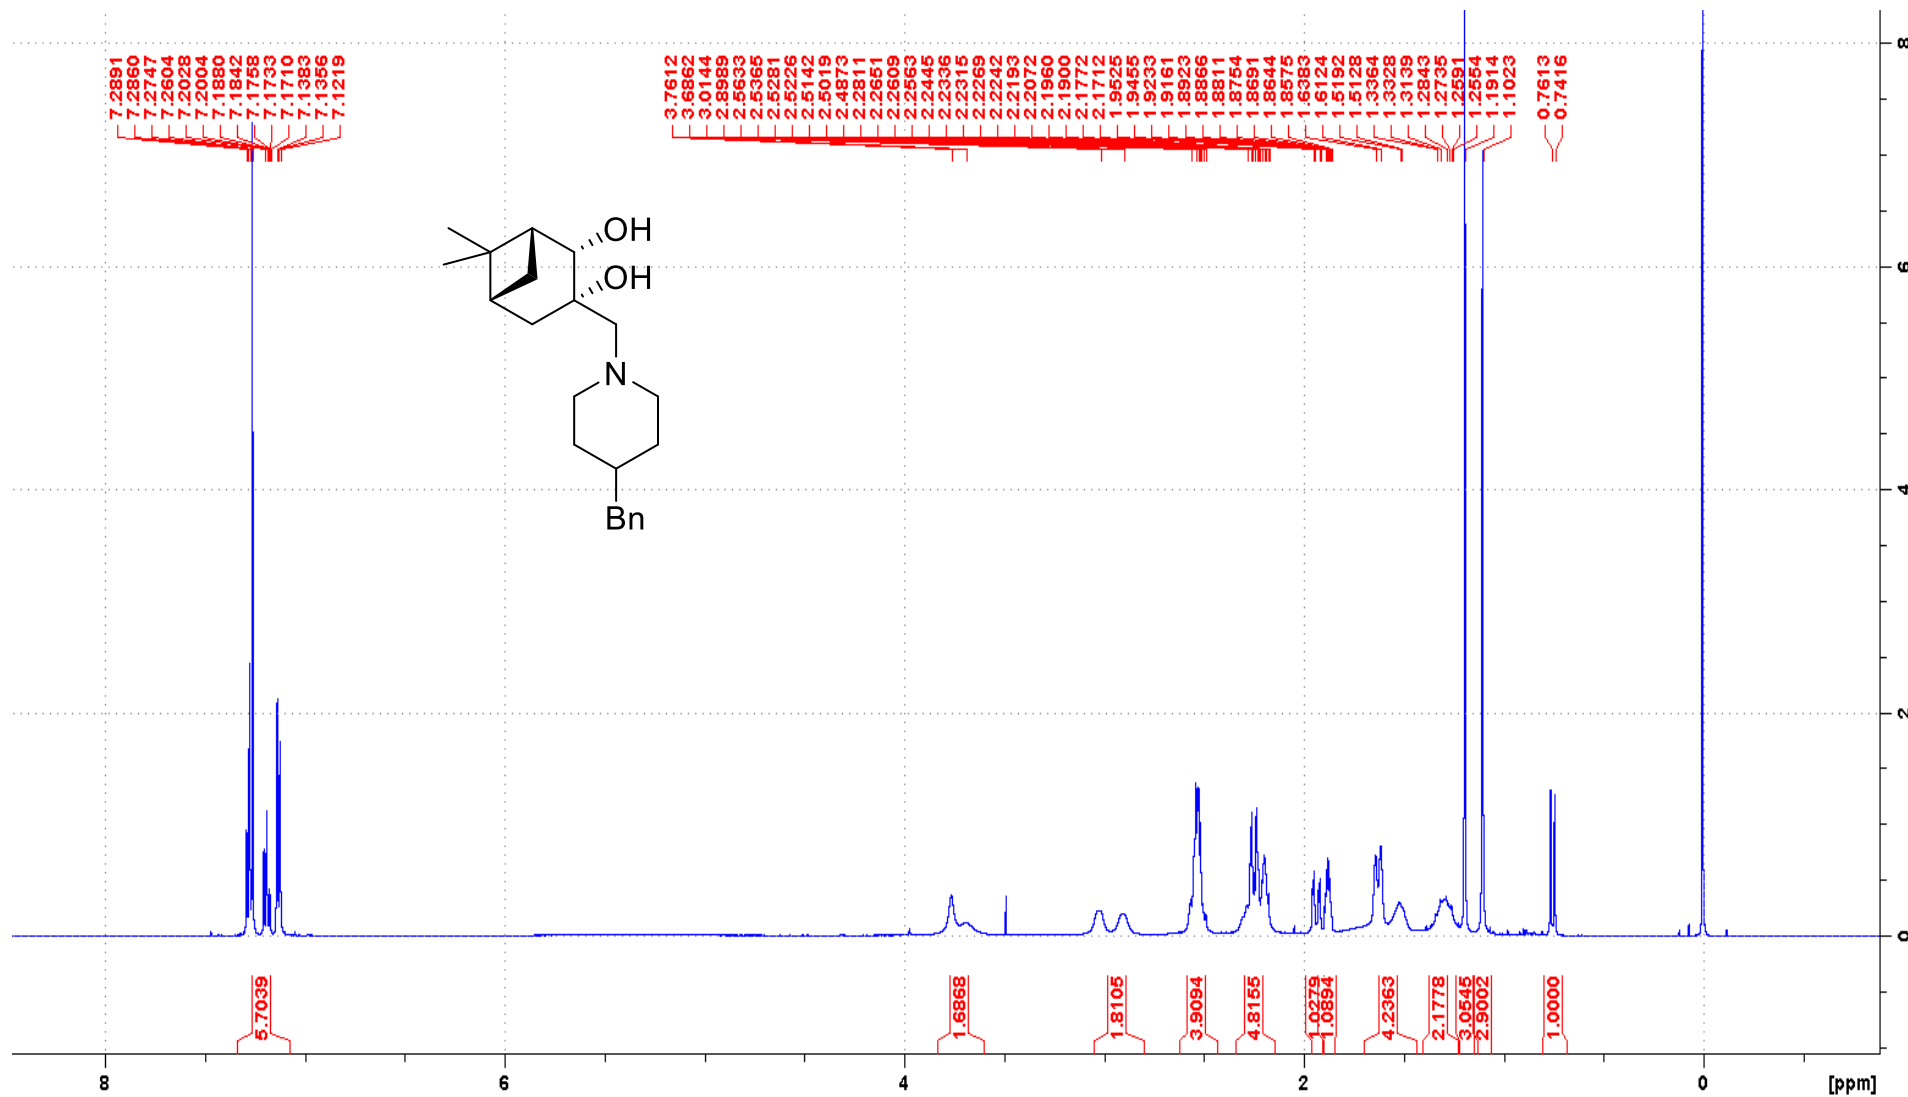



$^{13}\text{C}$ -NMR for compound **13**

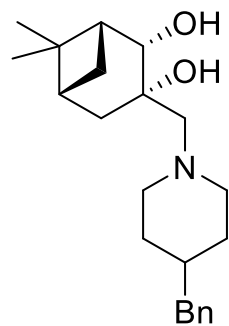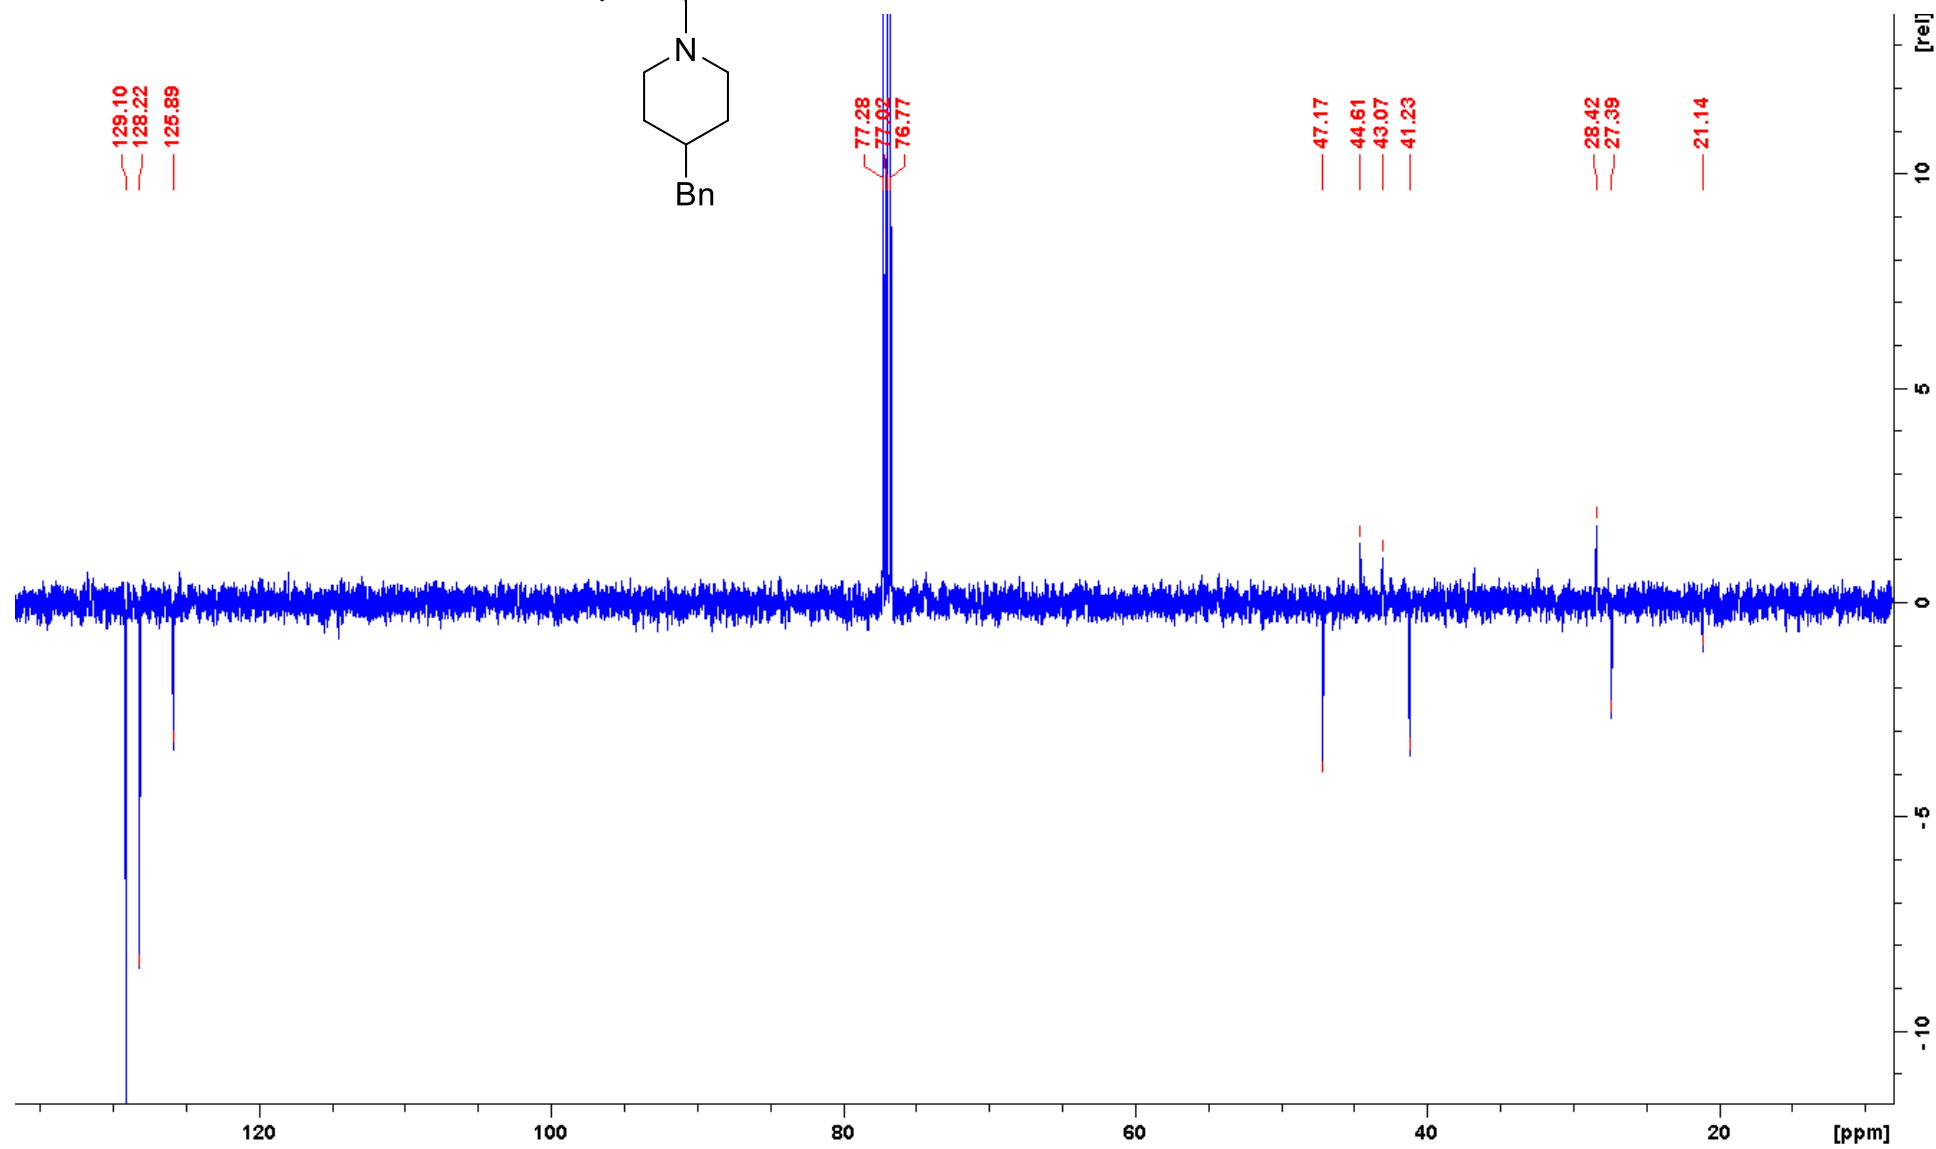

HSQC for compound **13**

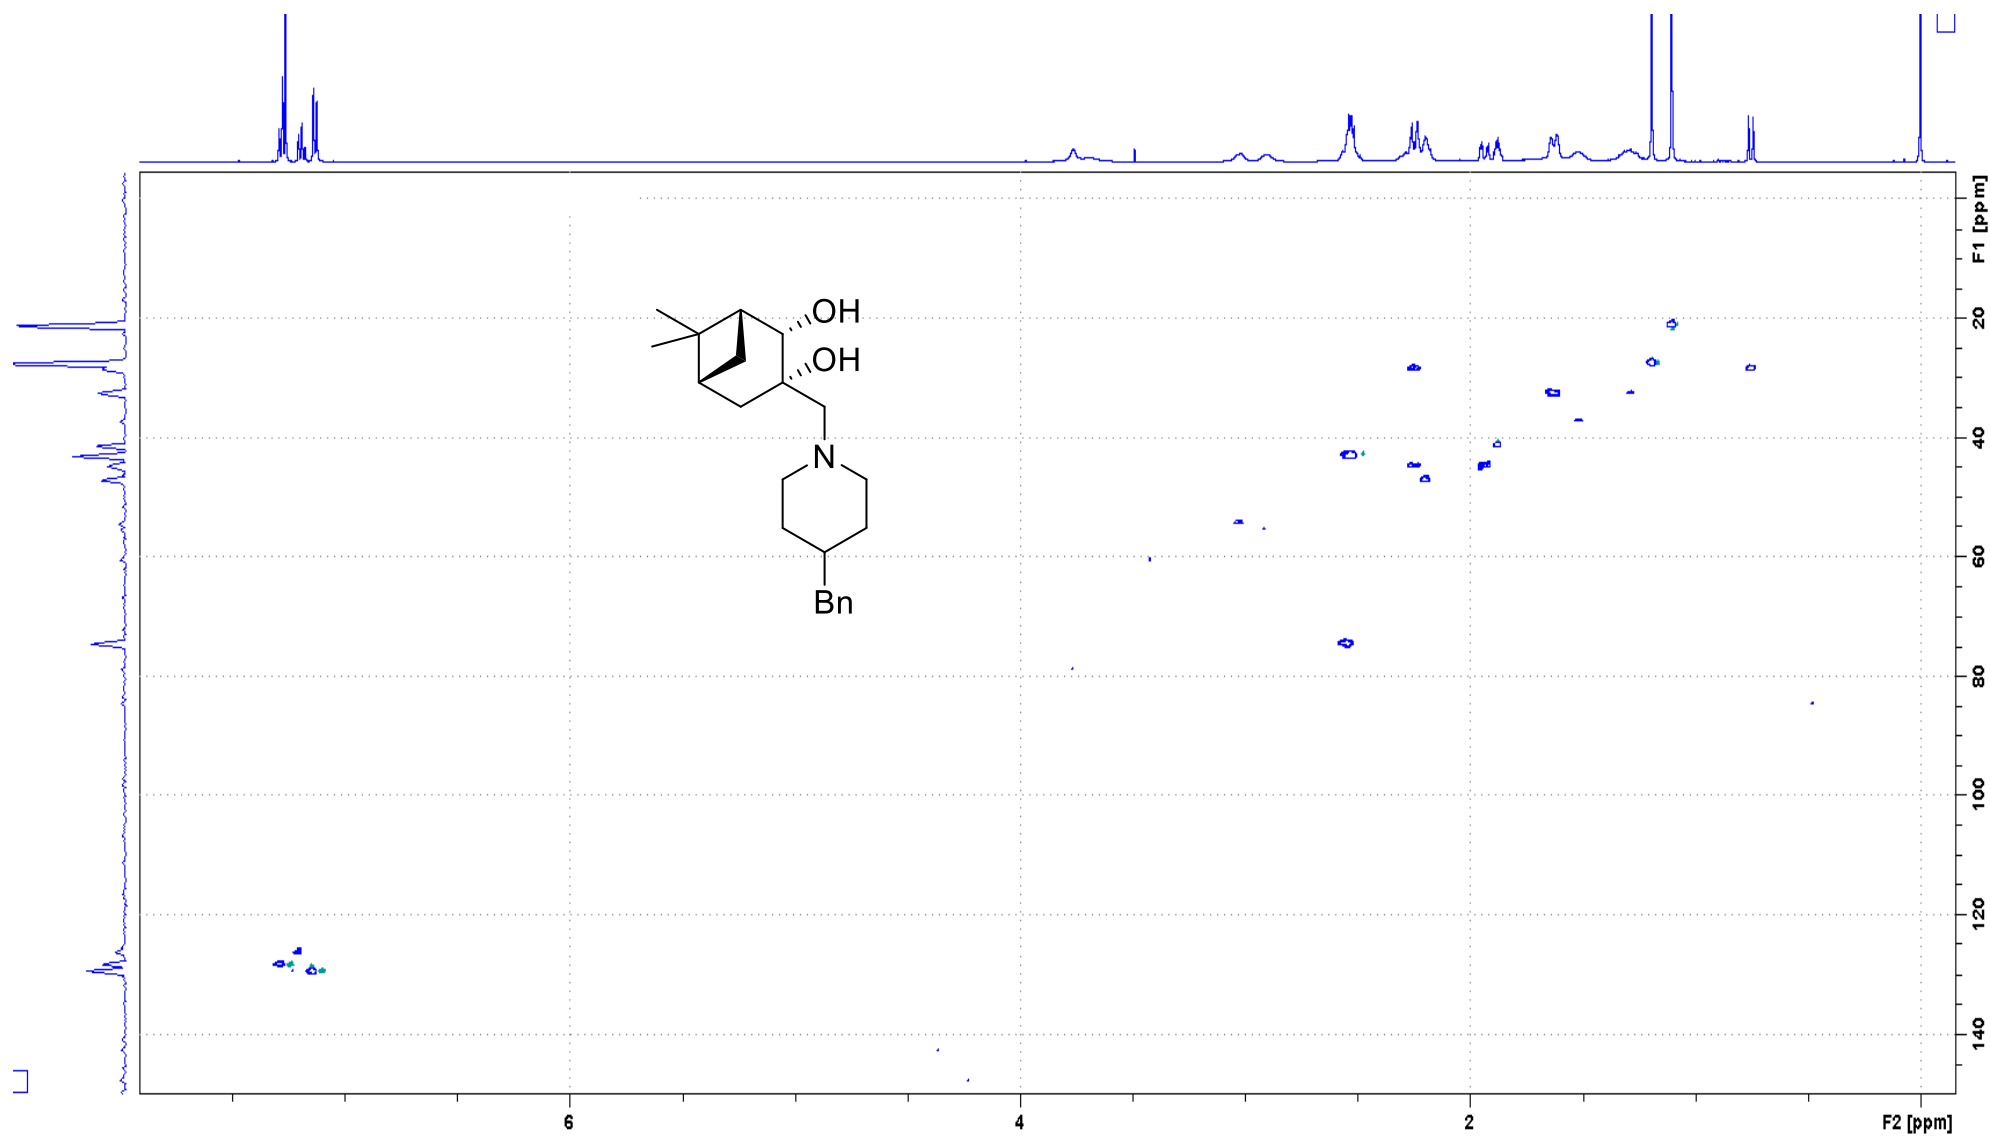

HMBC for compound **13**

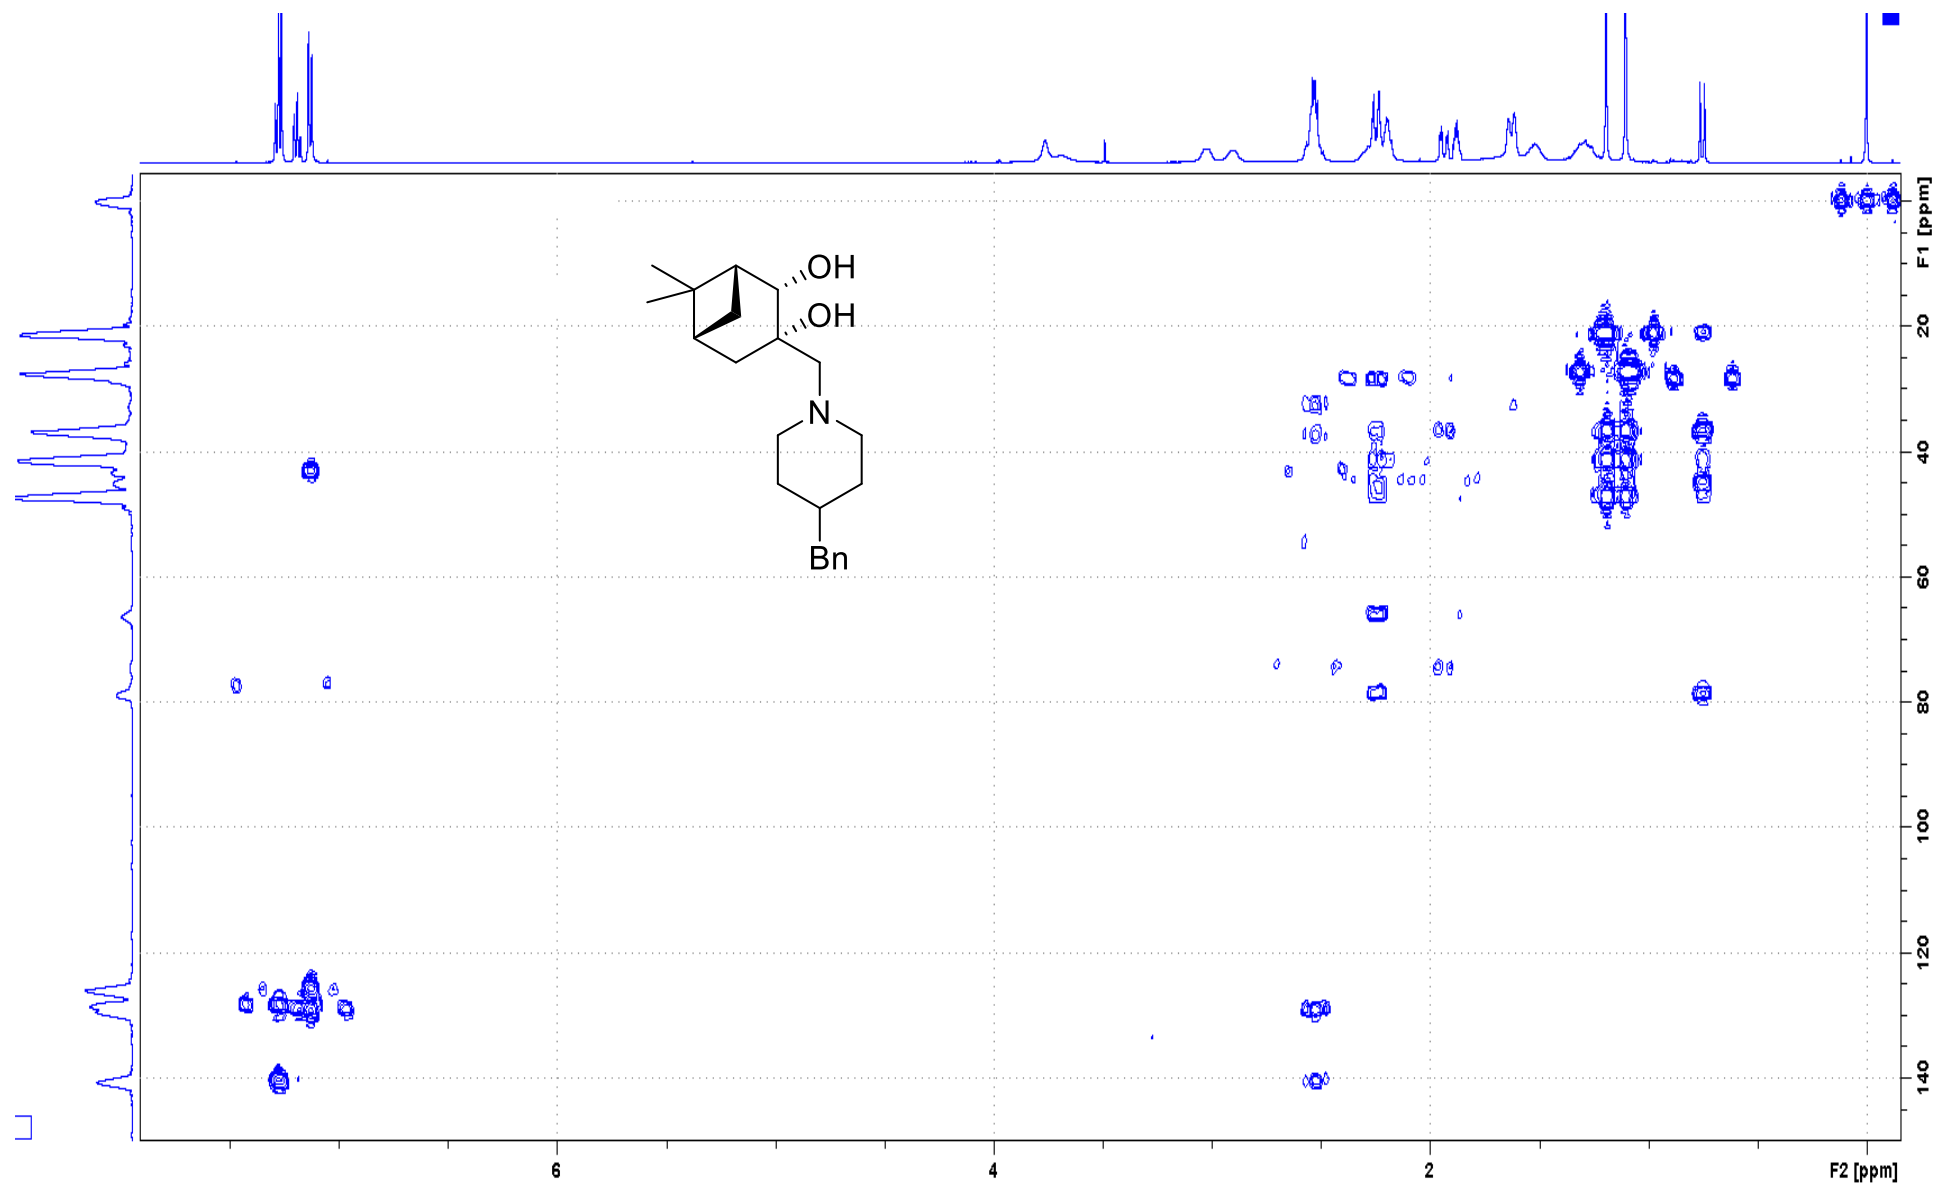

COSY for compound **13**

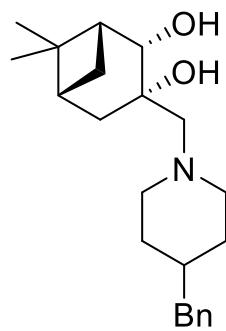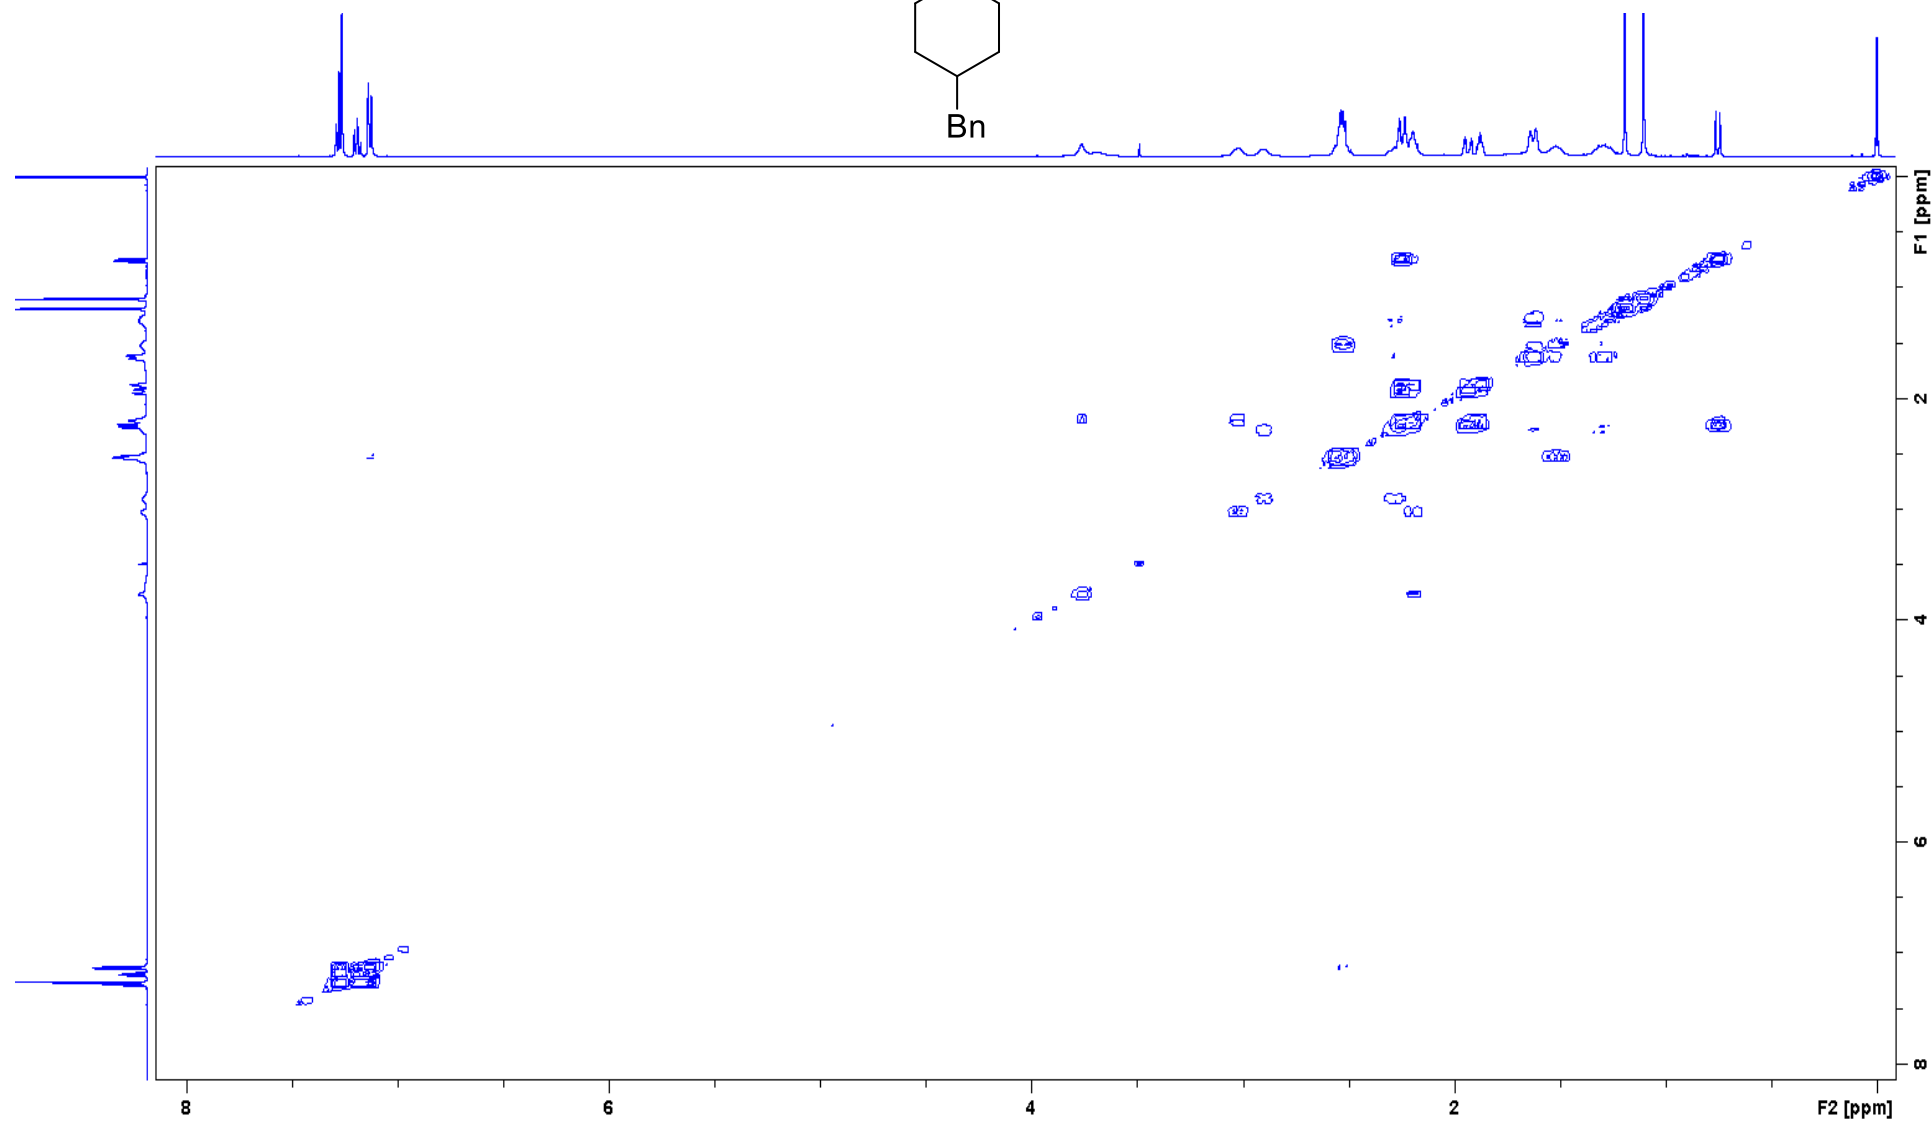

NOESY for compound **13**

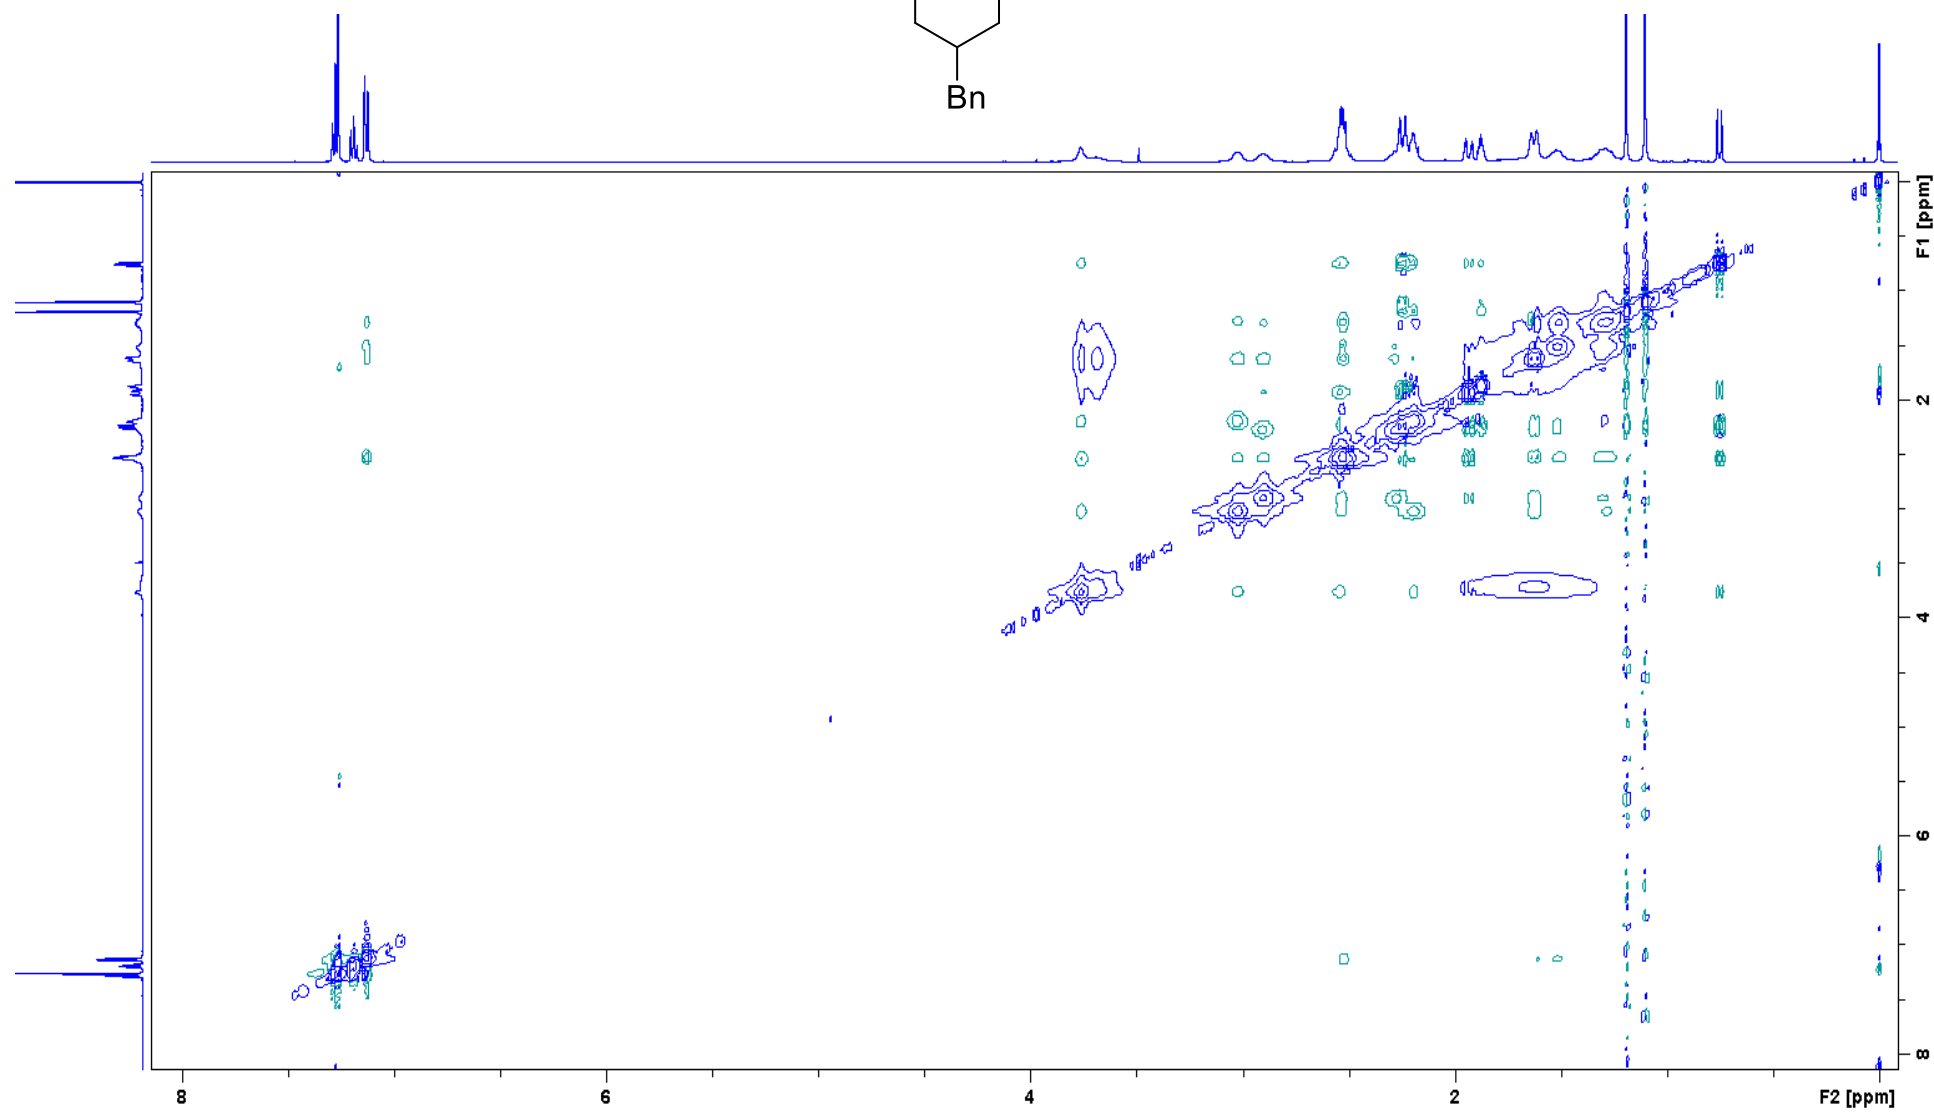

<sup>1</sup>H-NMR for compound **14**

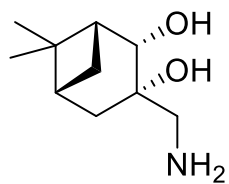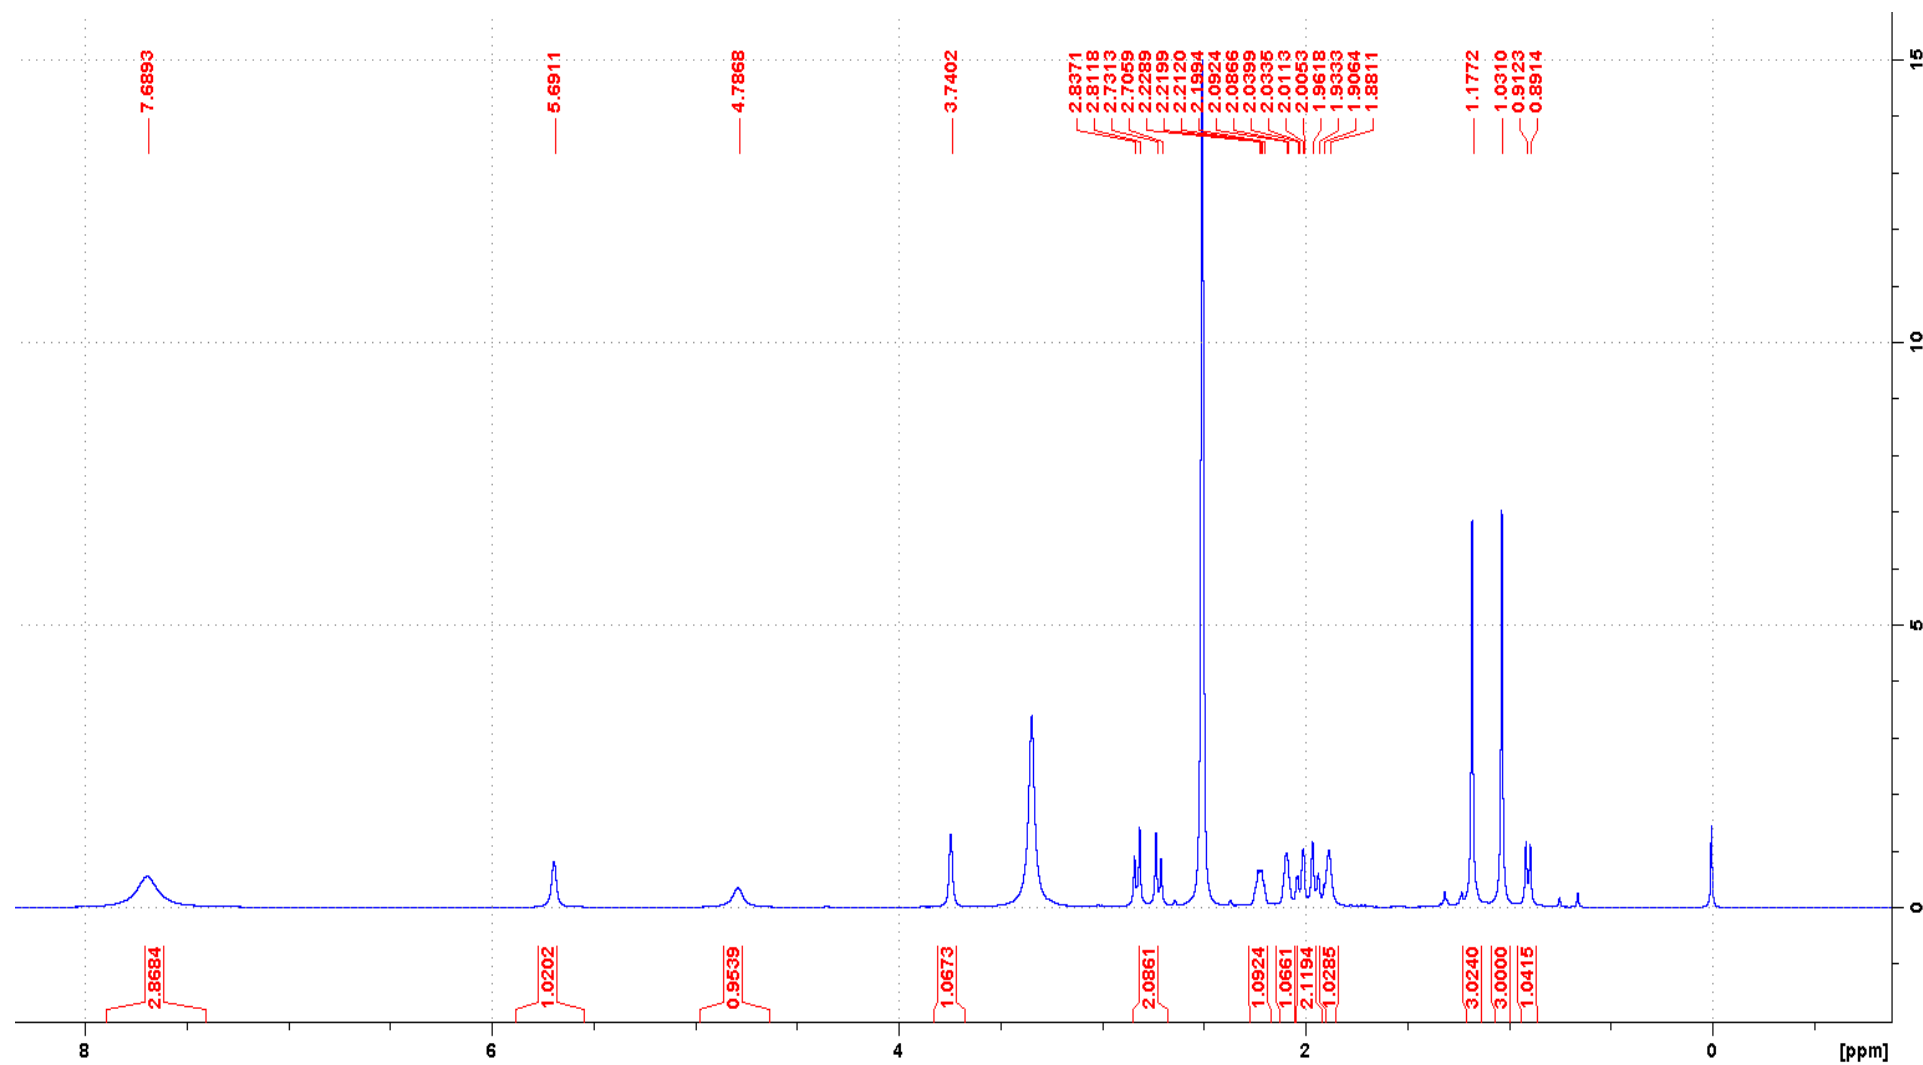

$^{13}\text{C}$ -NMR for compound **14**

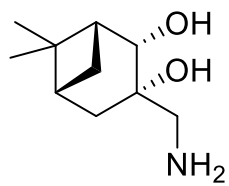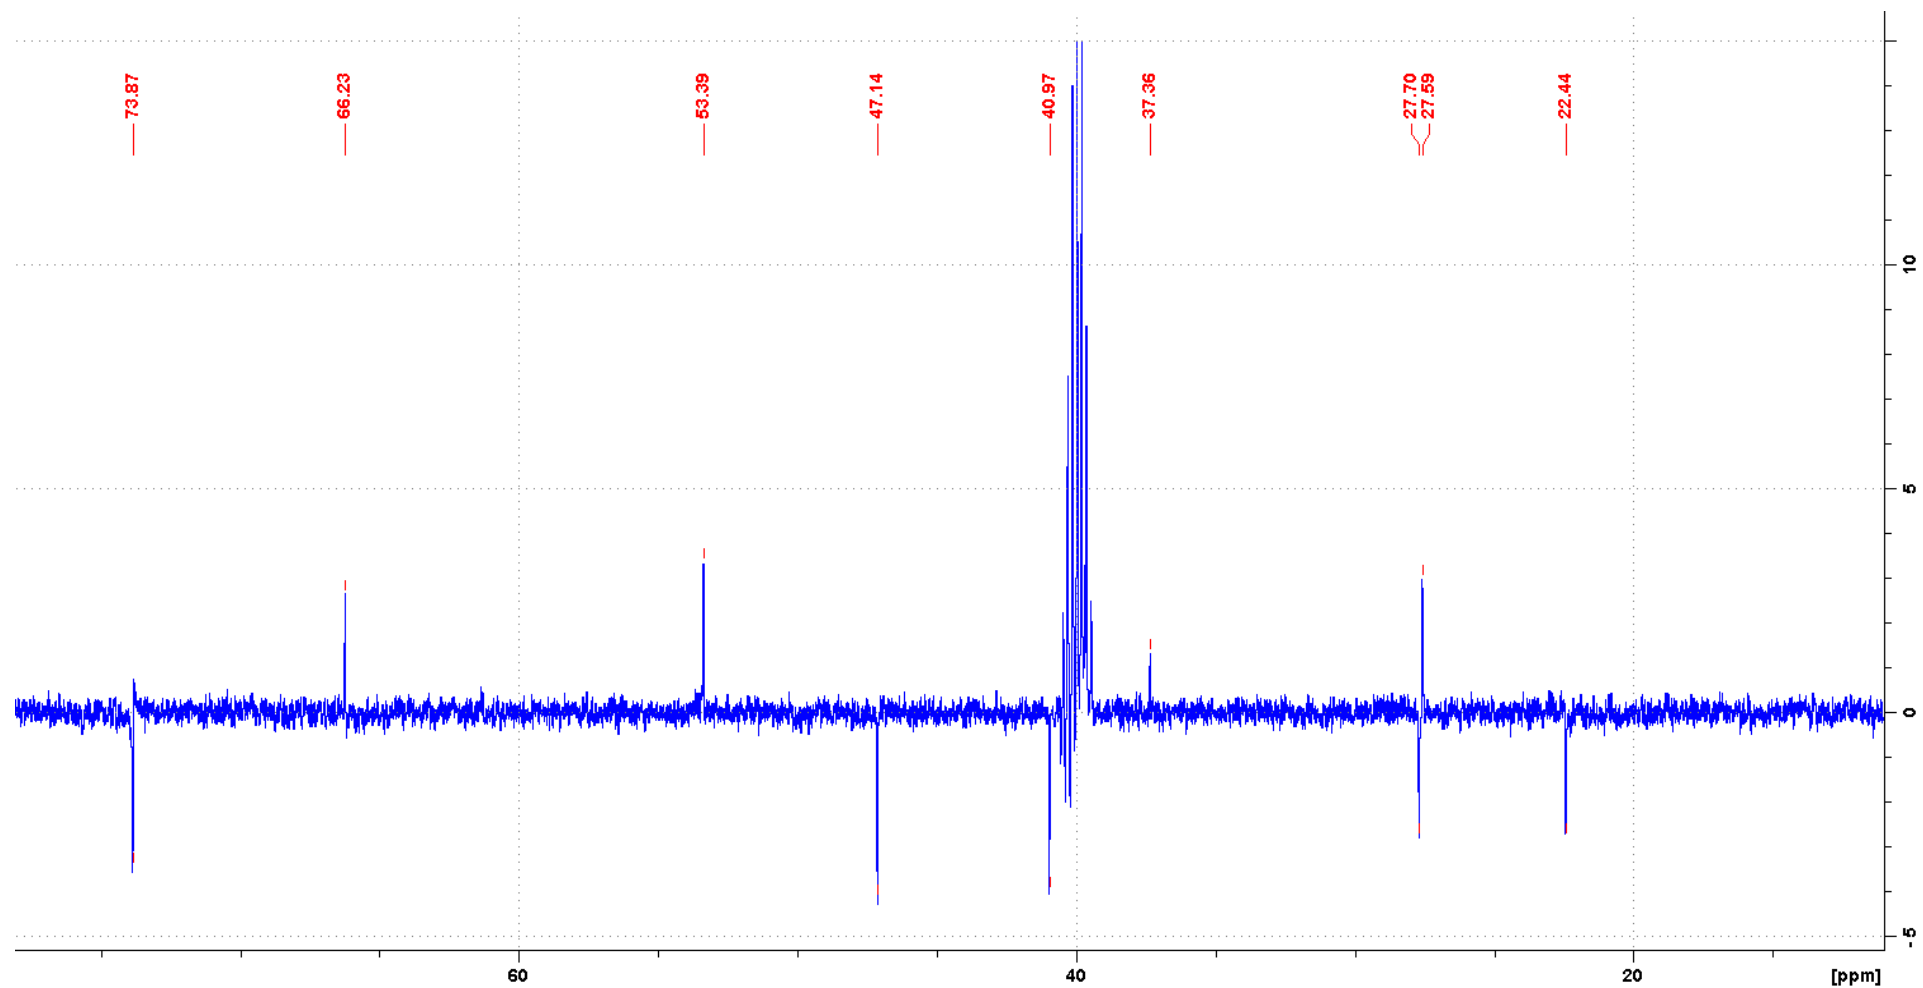

<sup>1</sup>H-NMR for compound **15**

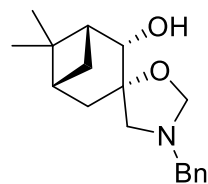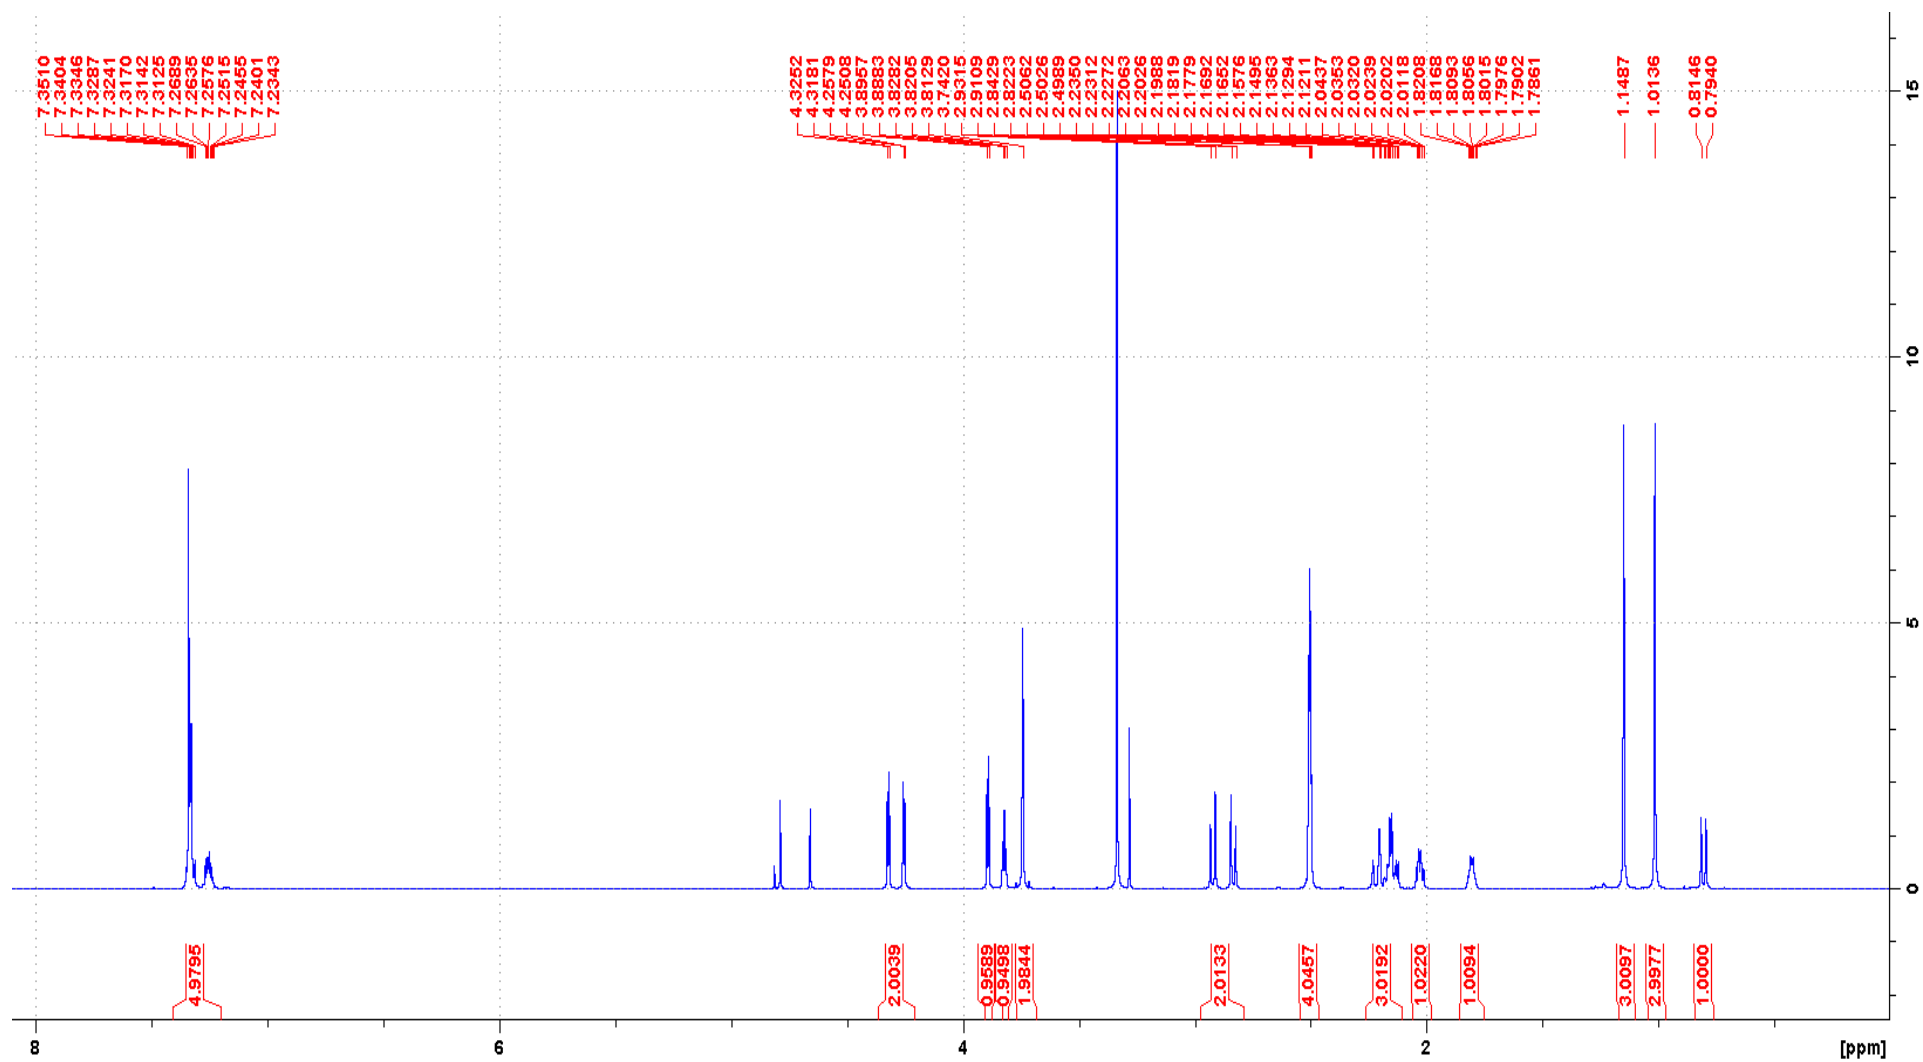



$^{13}\text{C}$ -NMR for compound **15**

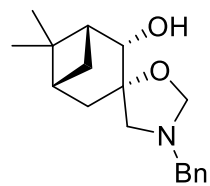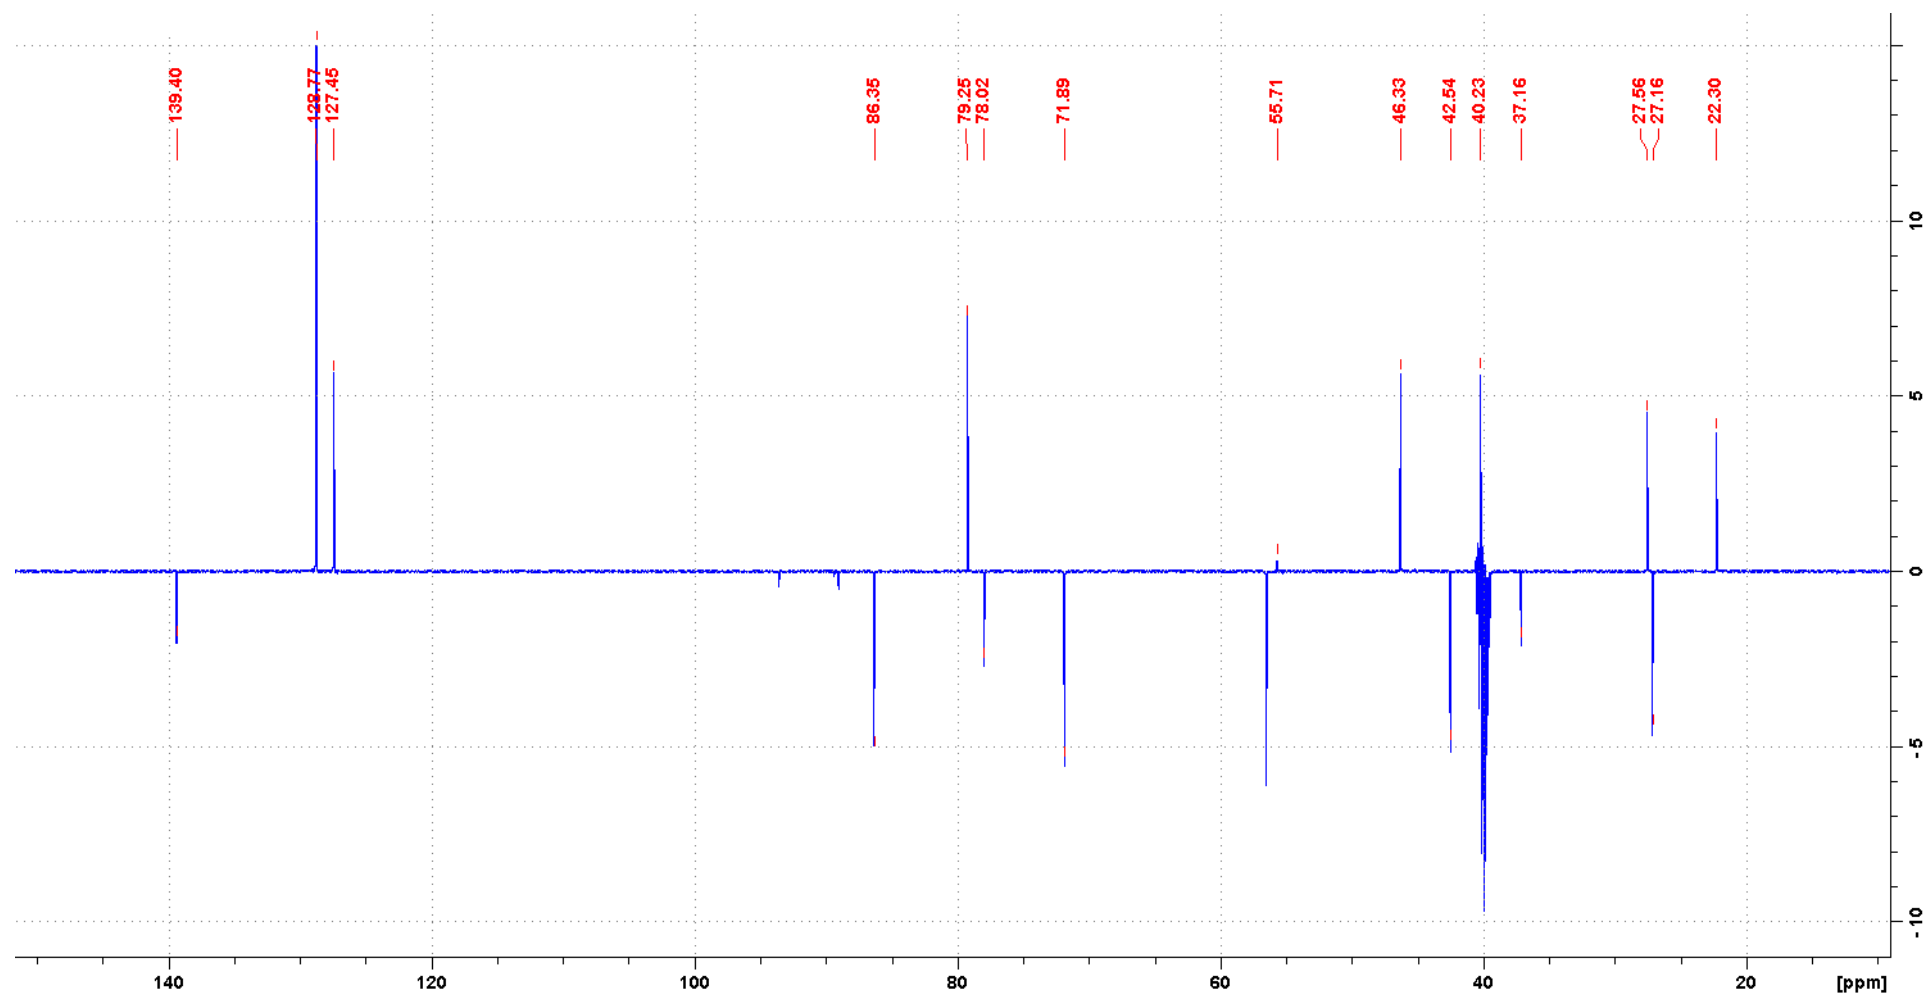

HSQC for compound **15**

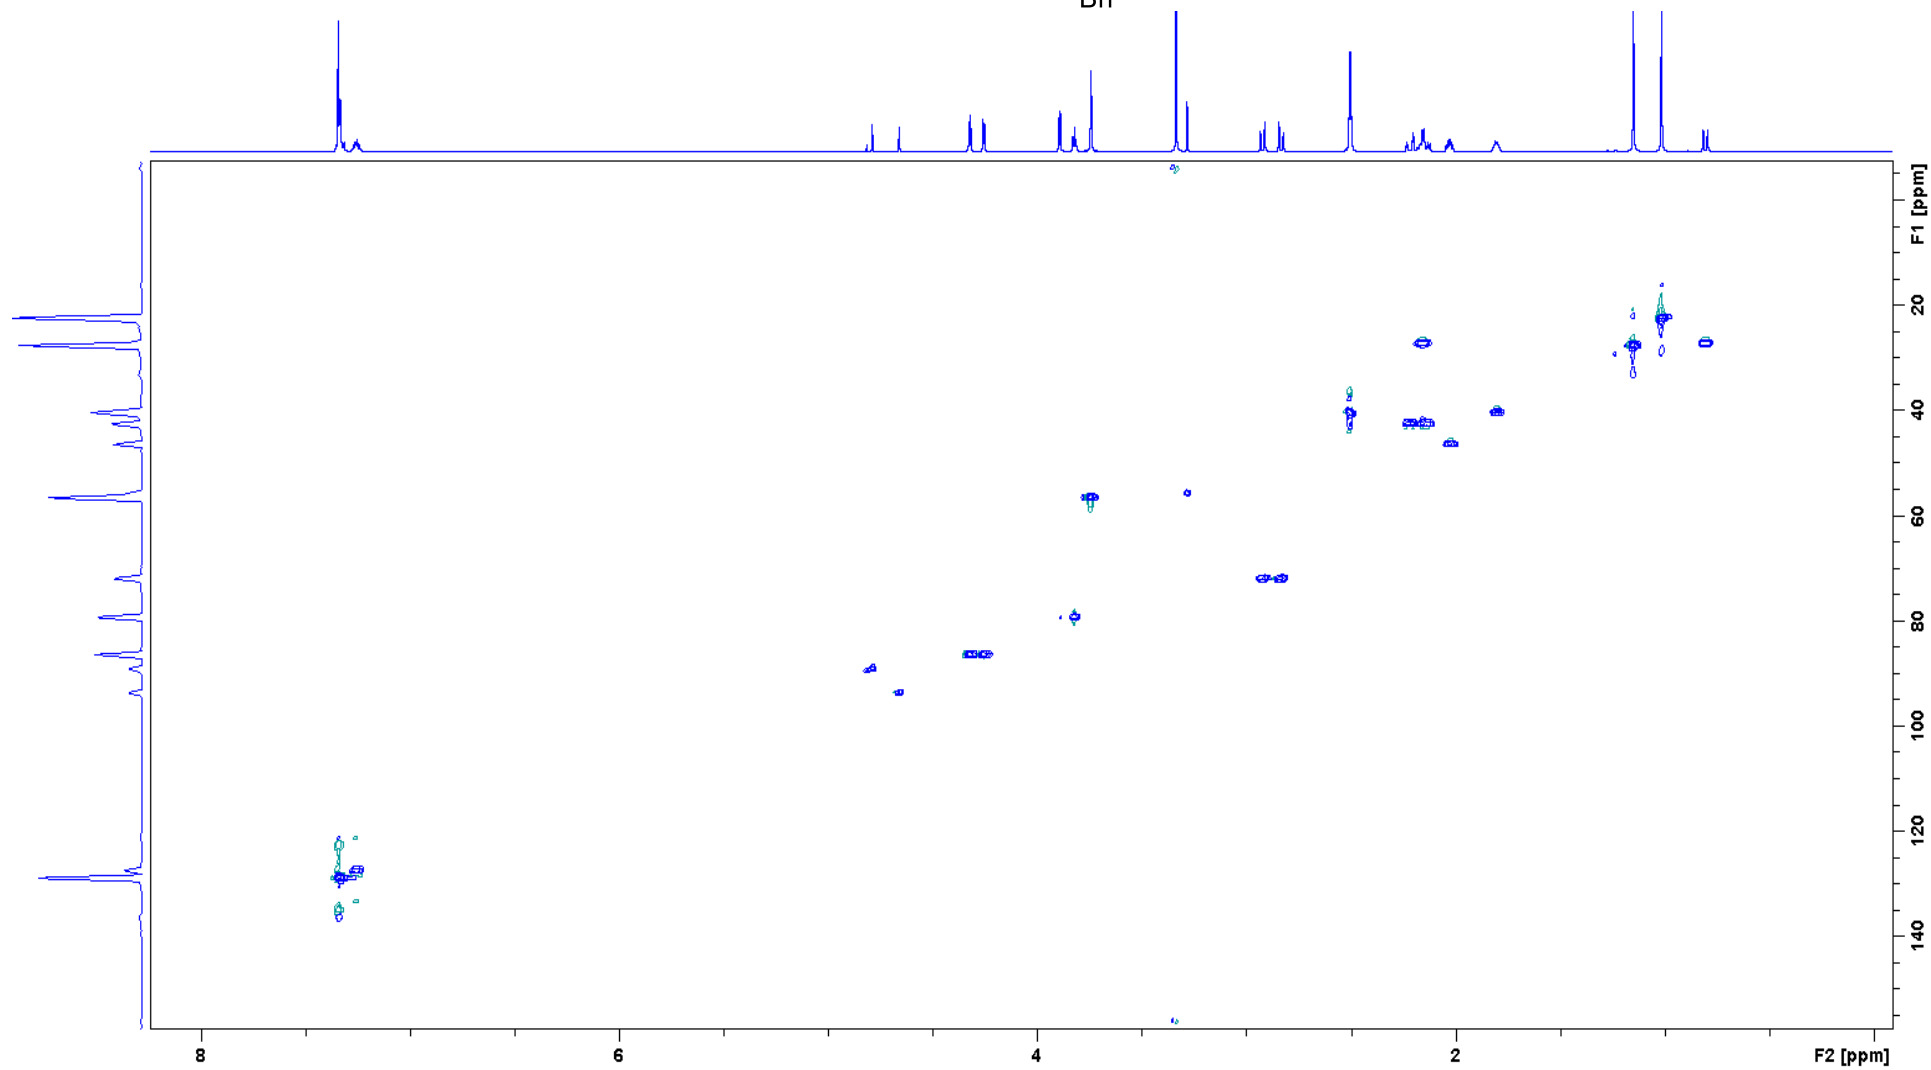

HMBC for compound **15**

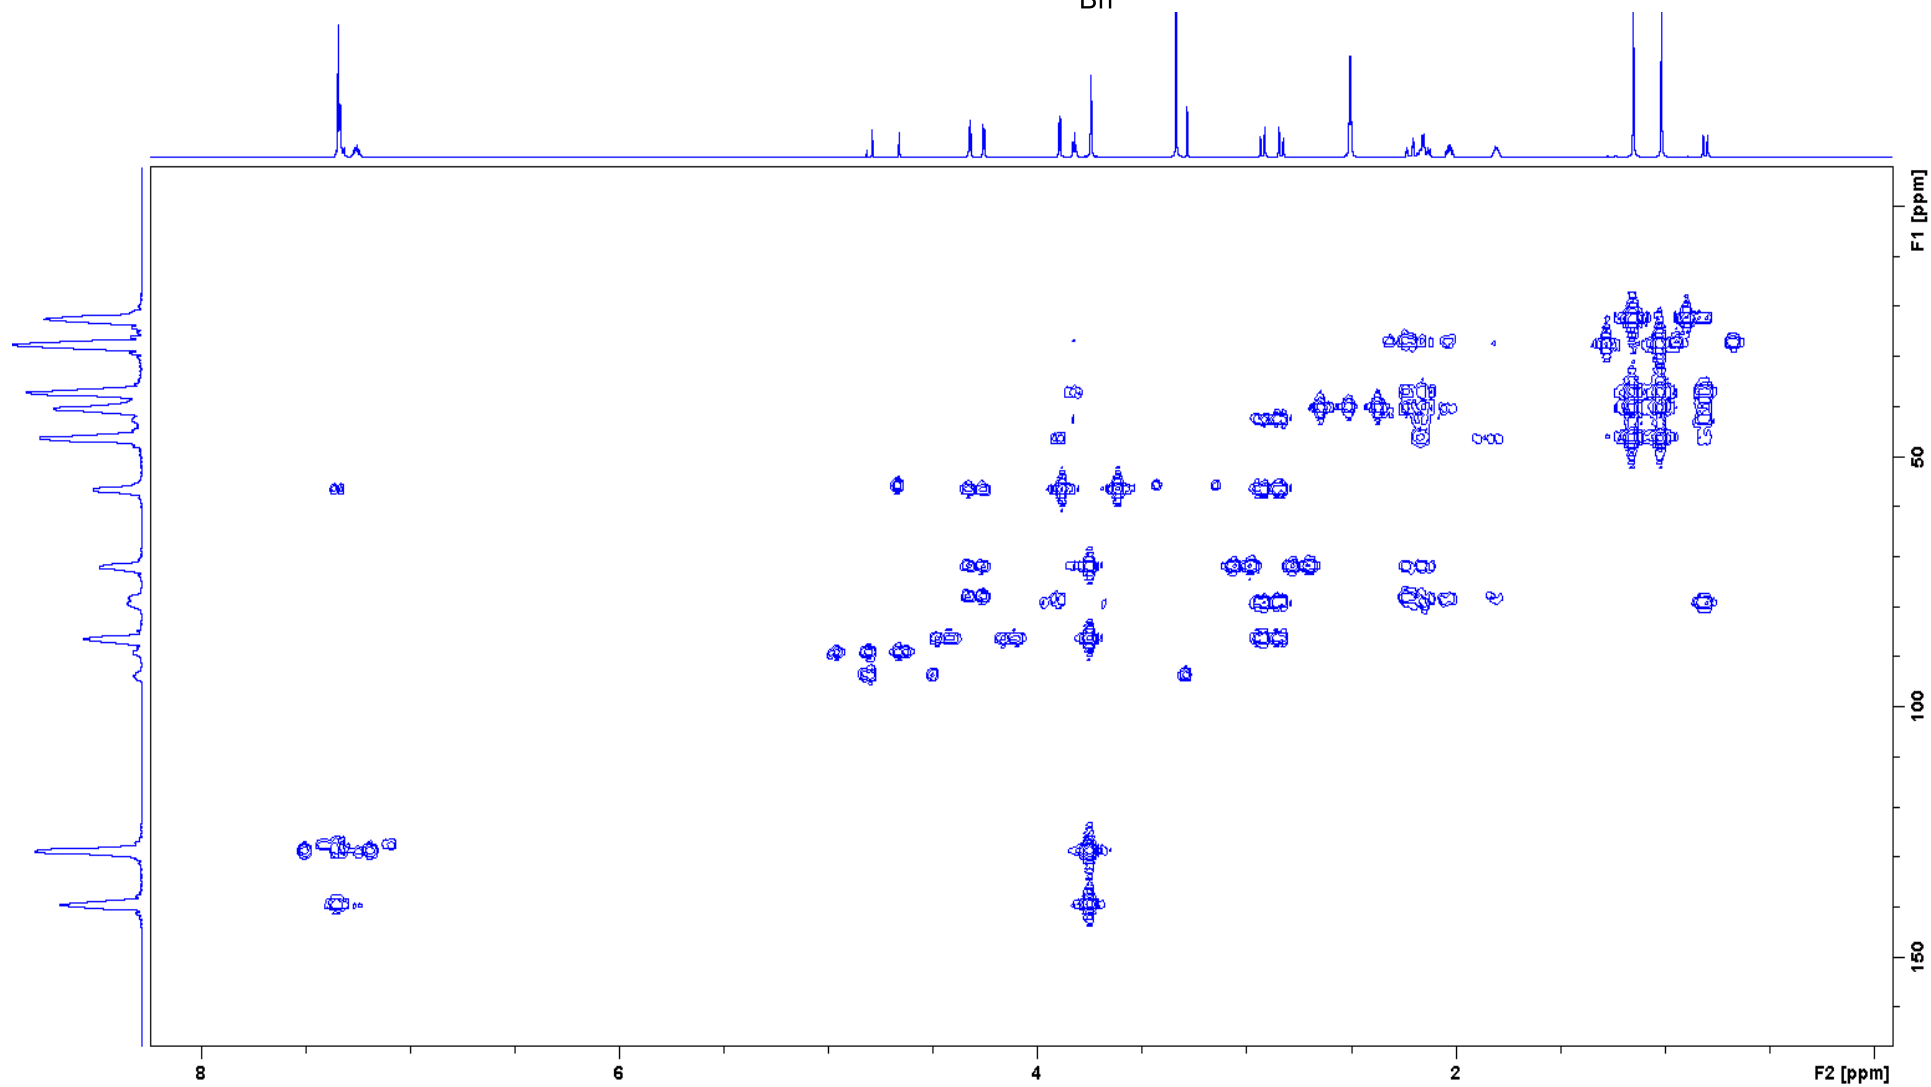

COSY for compound **15**

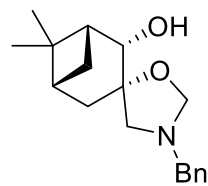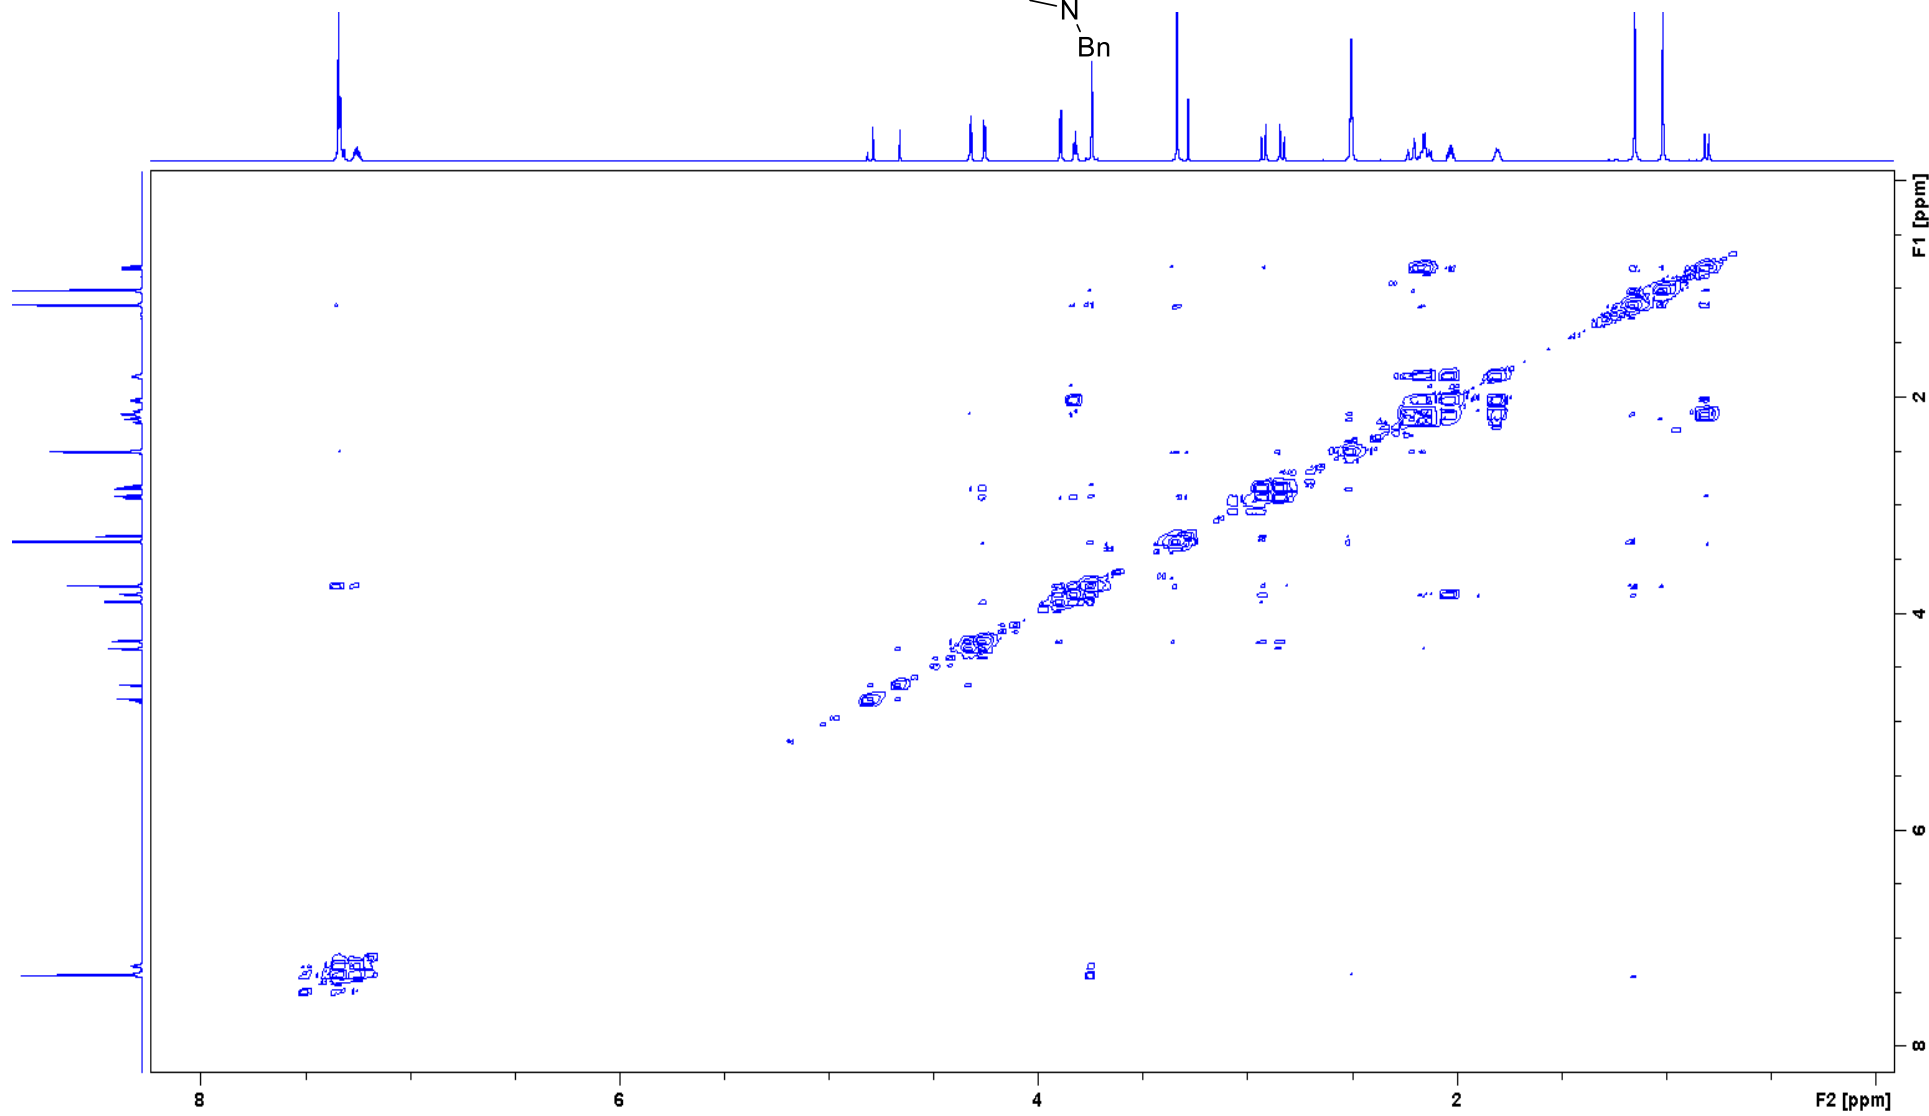

NOESY for compound **15**

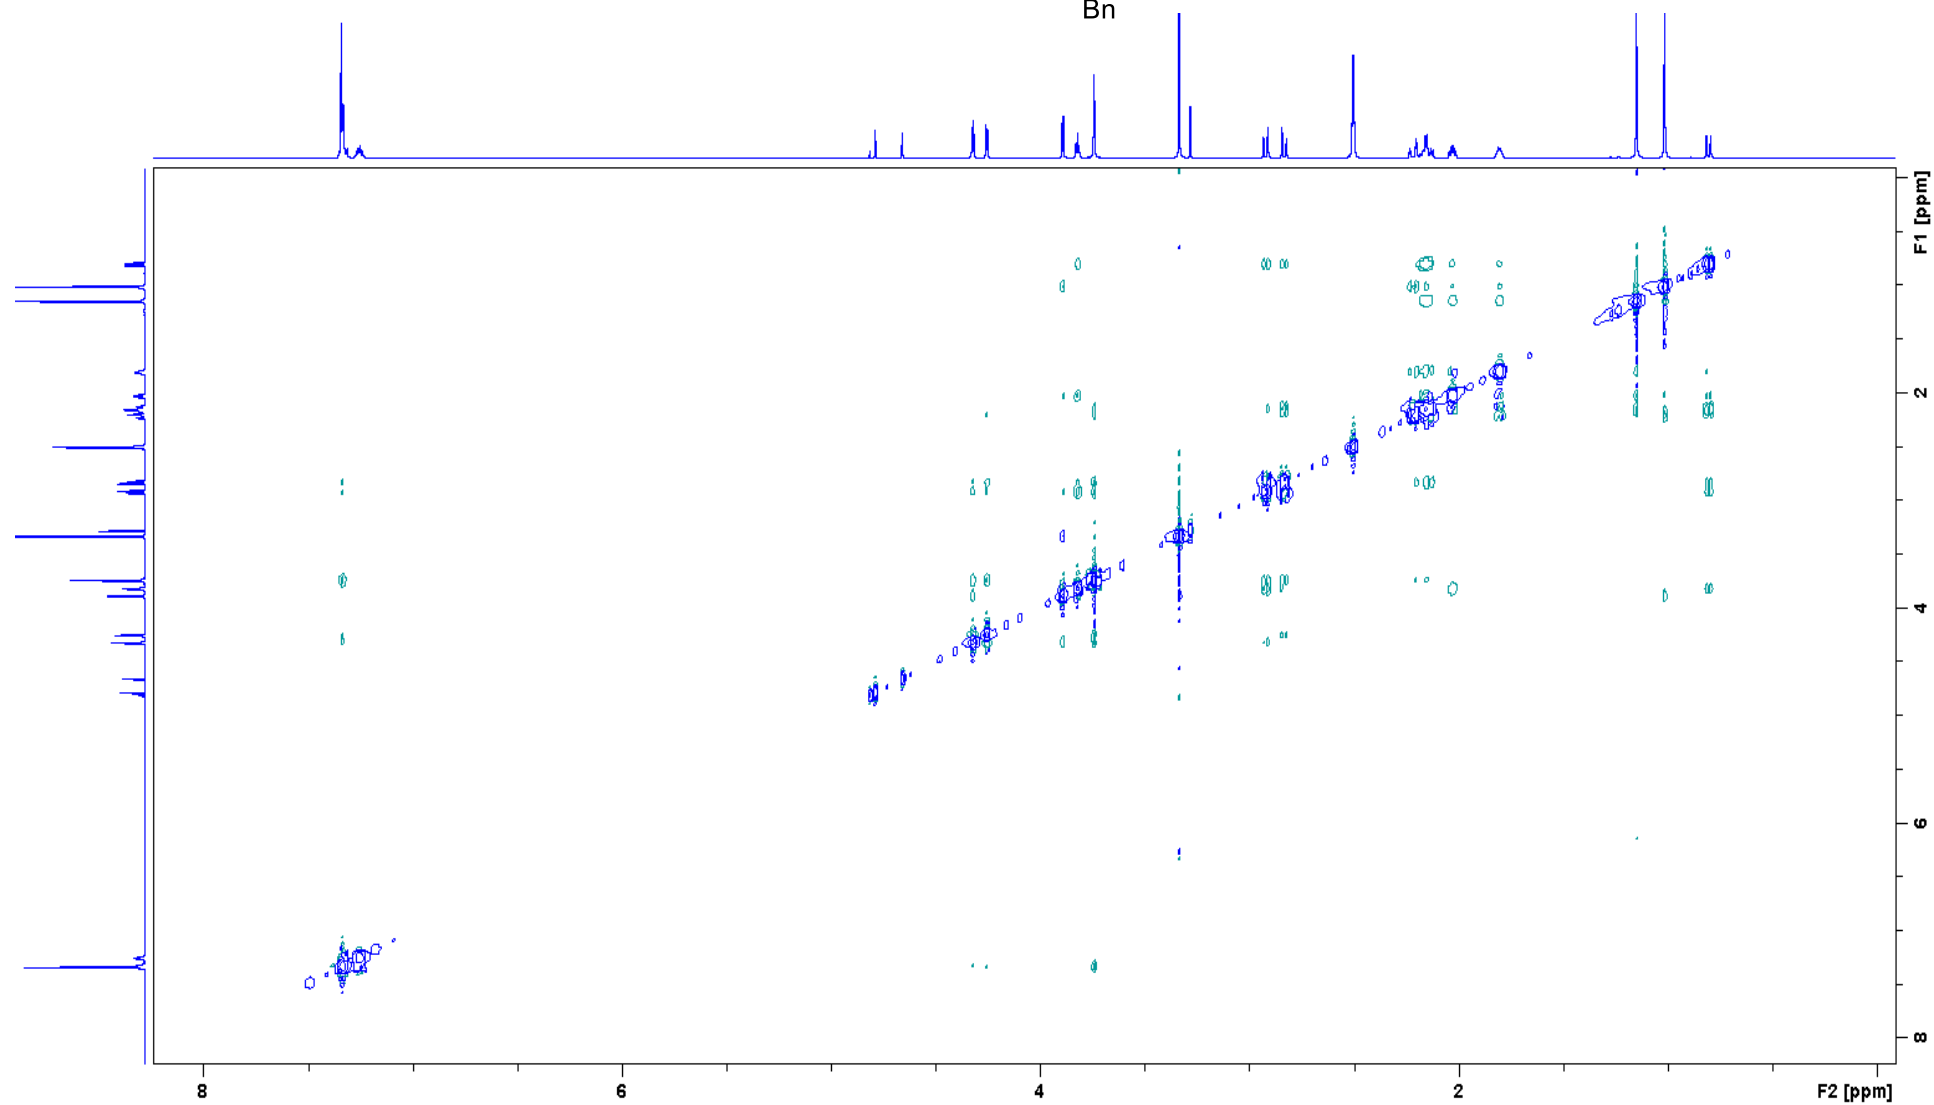

<sup>1</sup>H-NMR for compound **16**

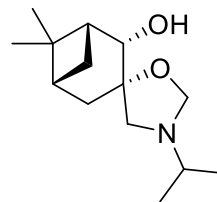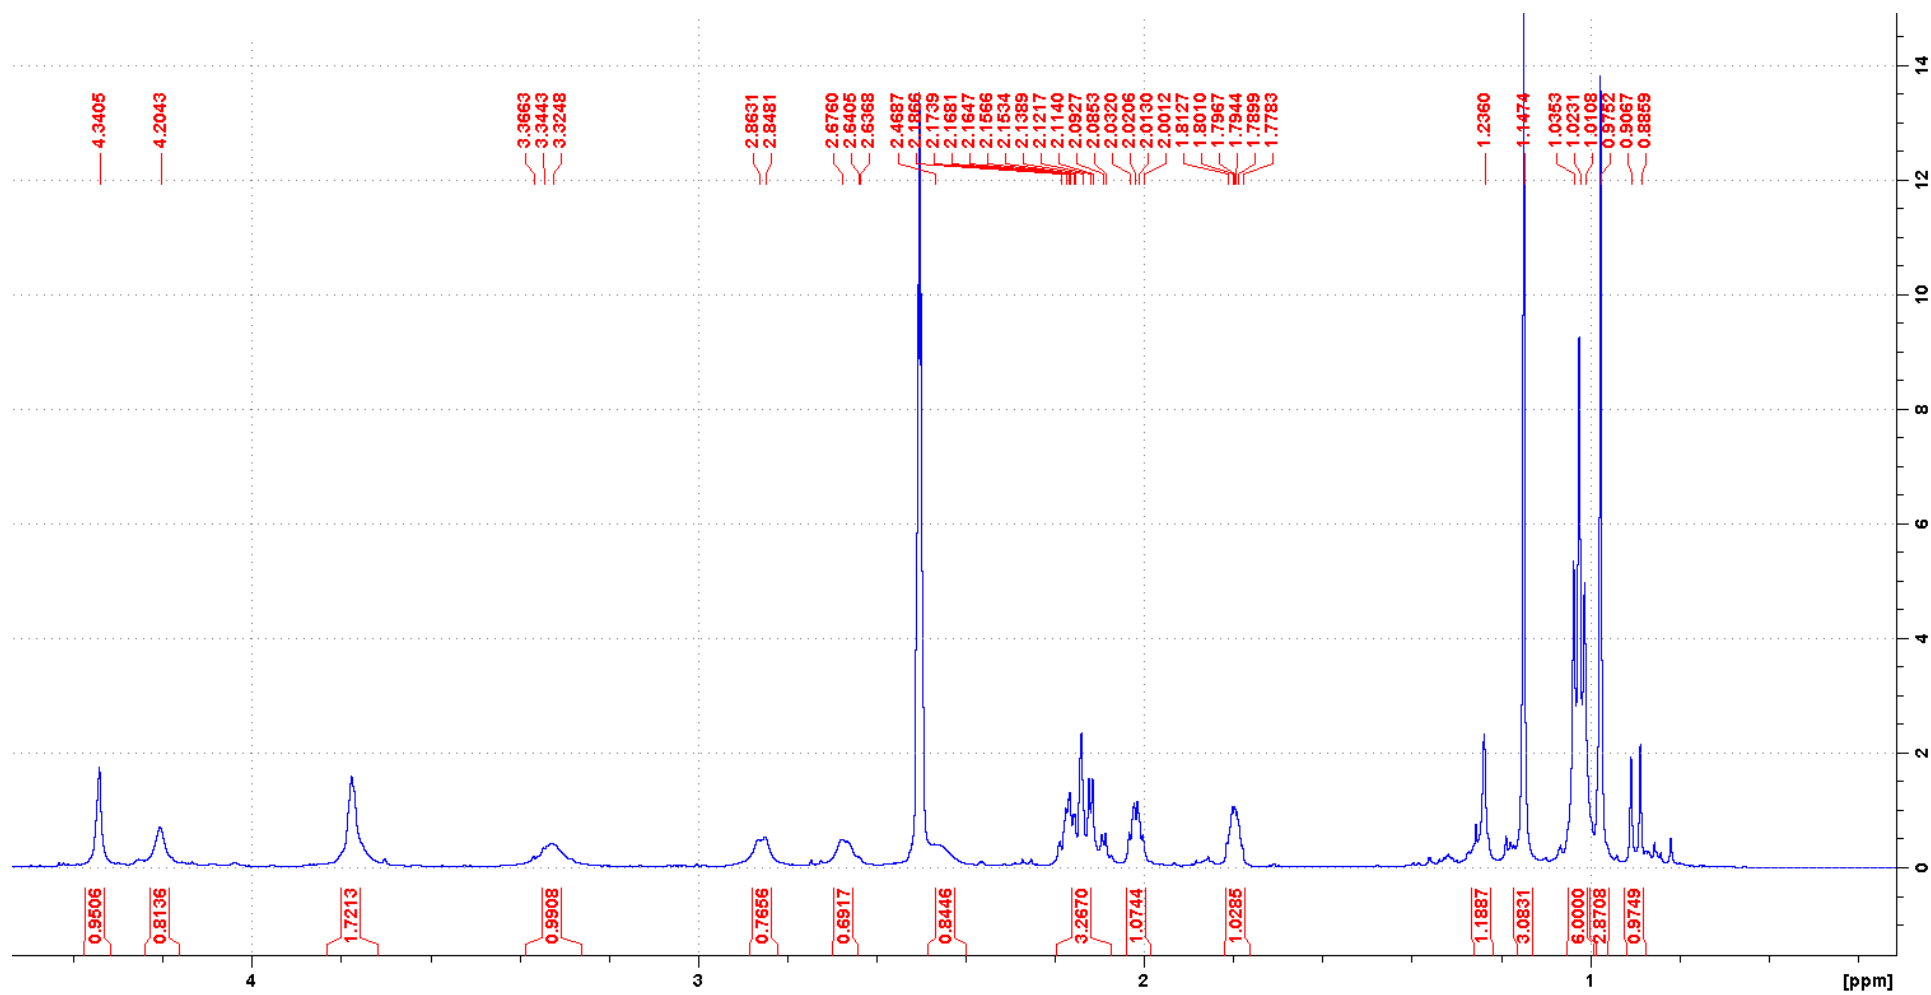

$^{13}\text{C}$ -NMR for compound **16**

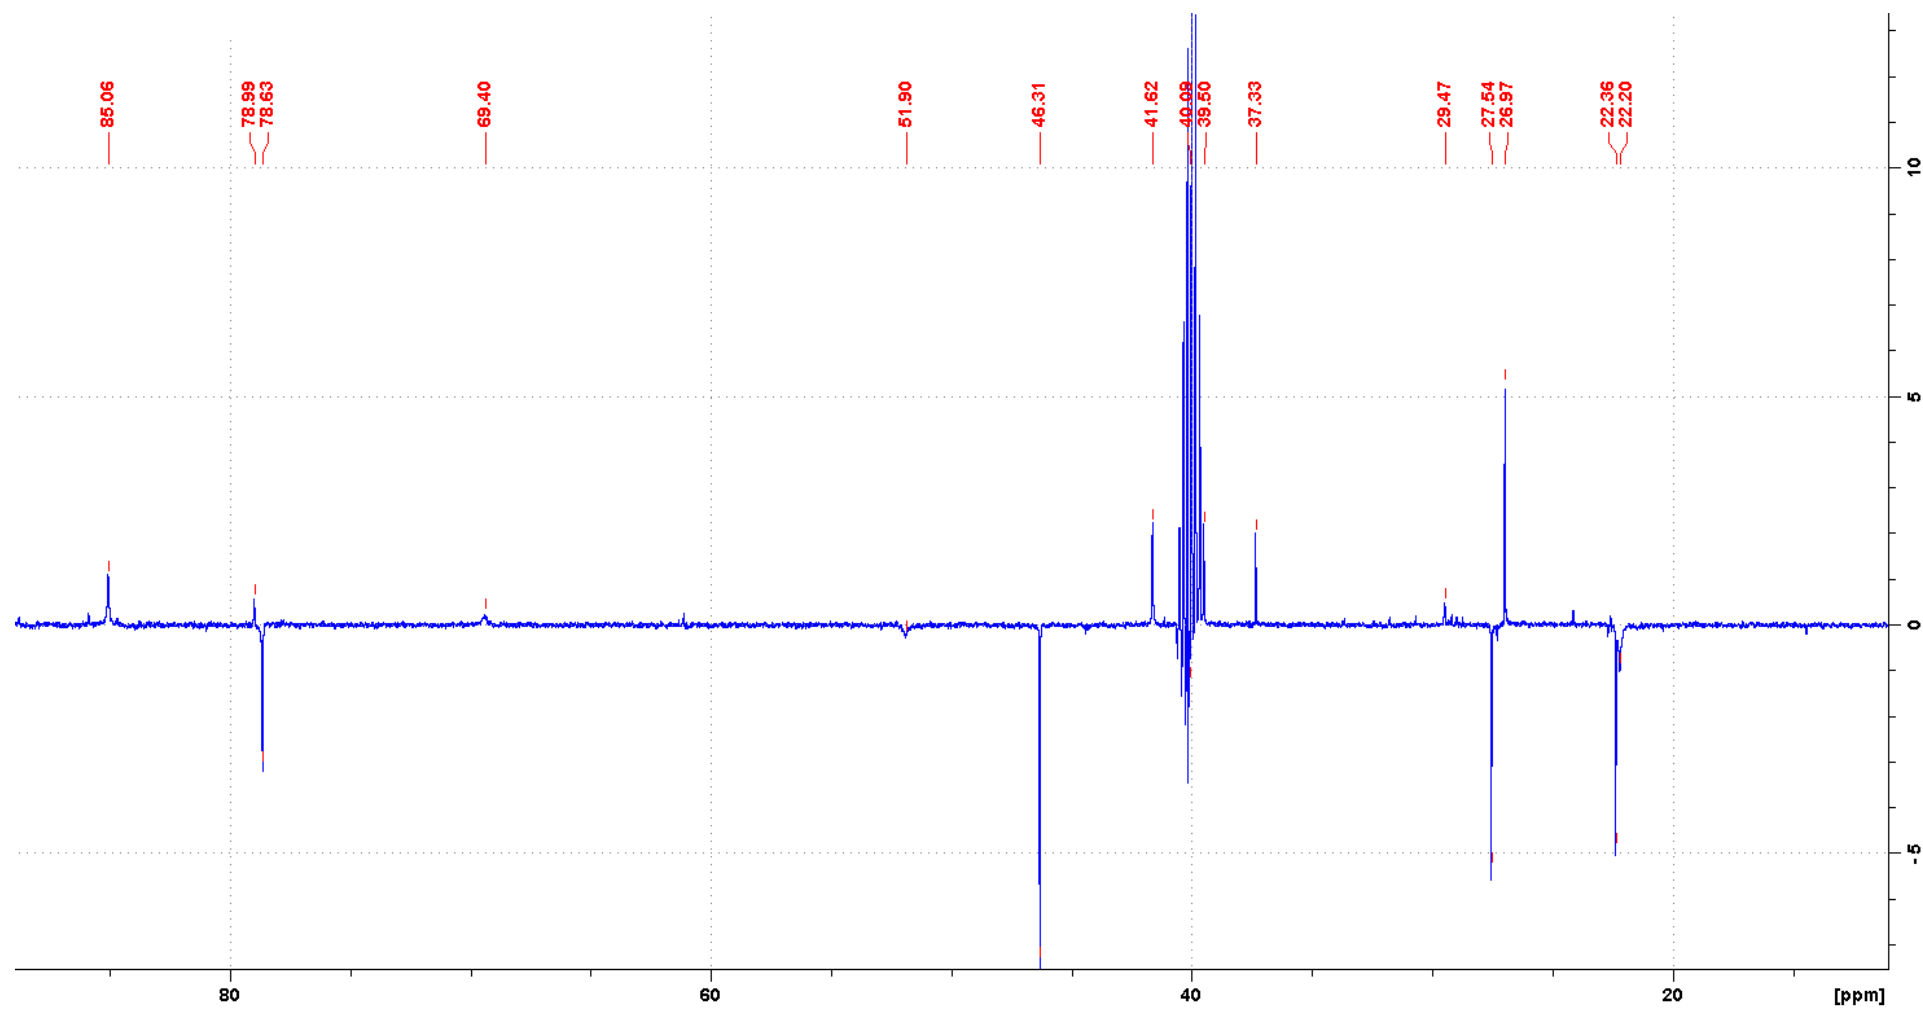

HSQC for compound **16**

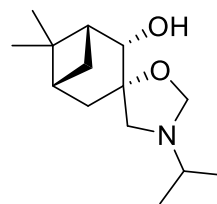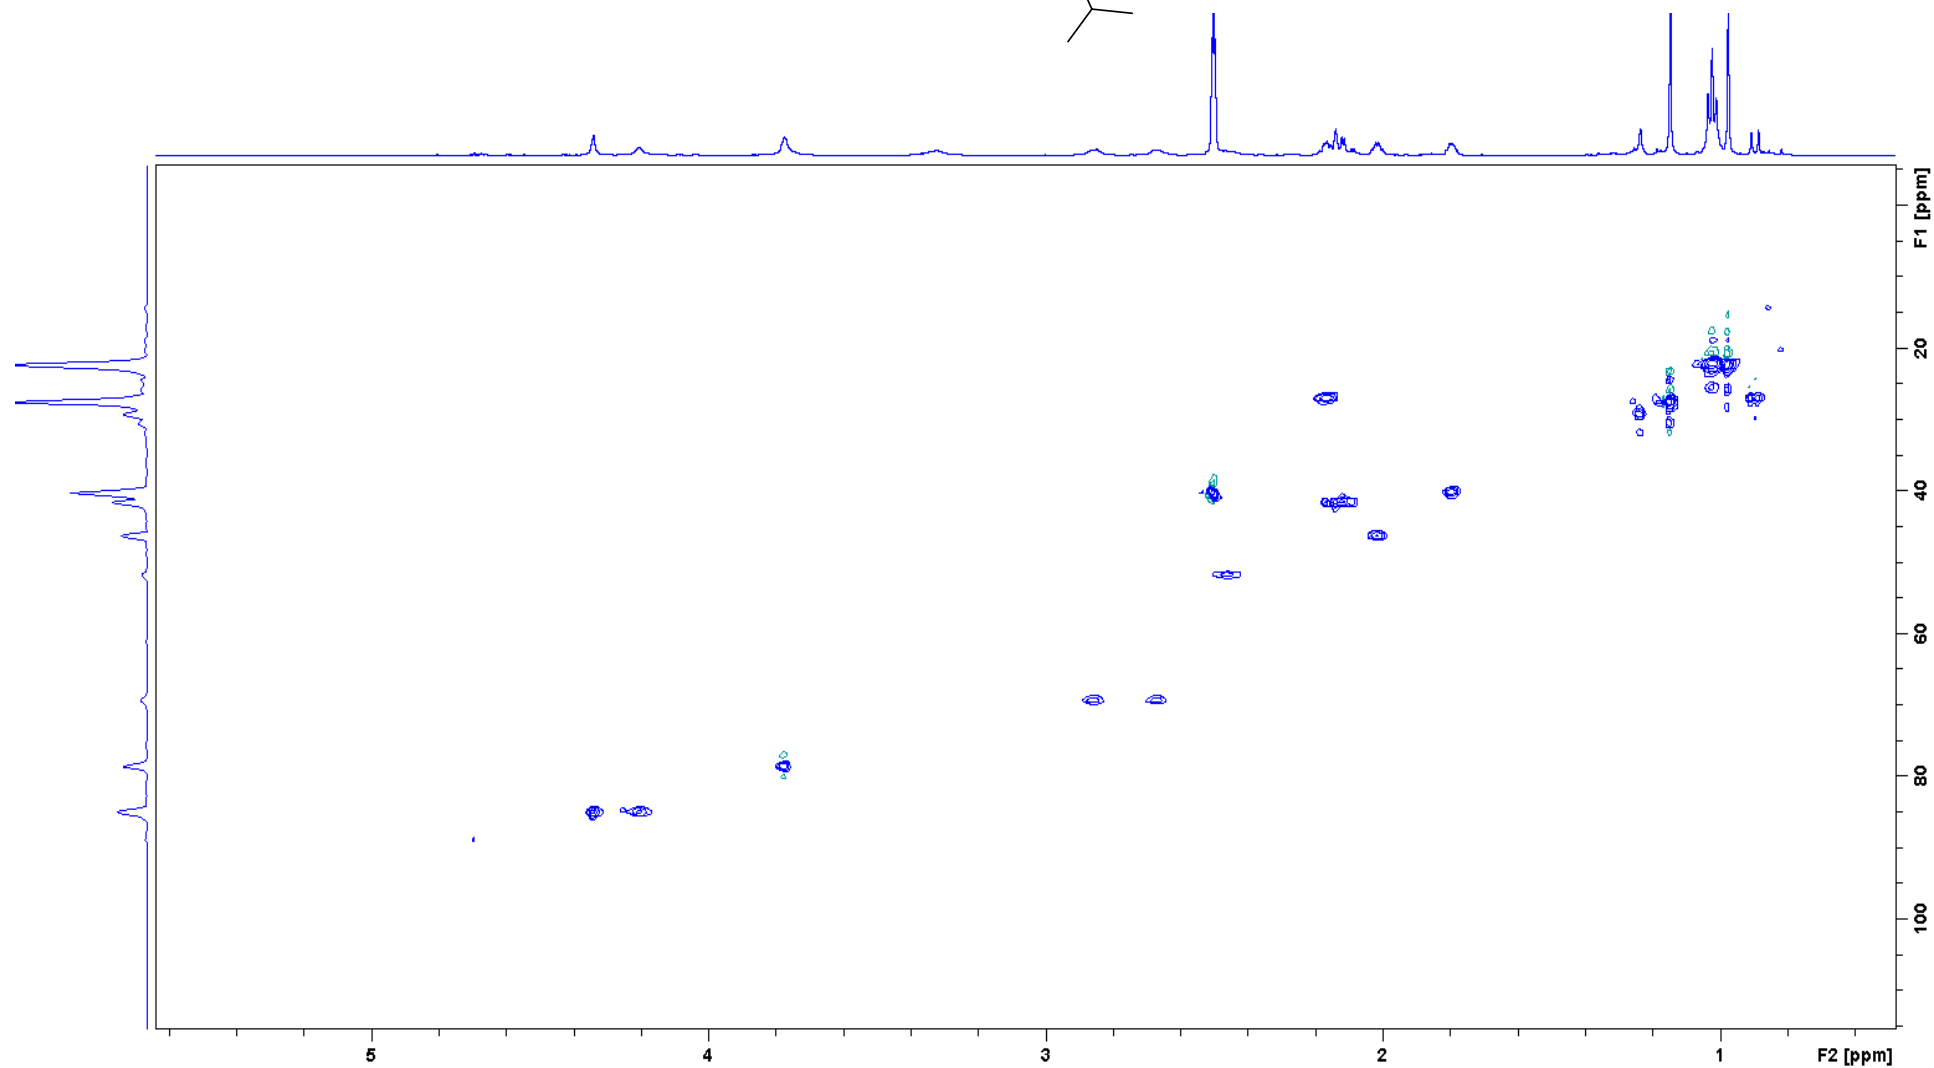



HMBC for compound **16**

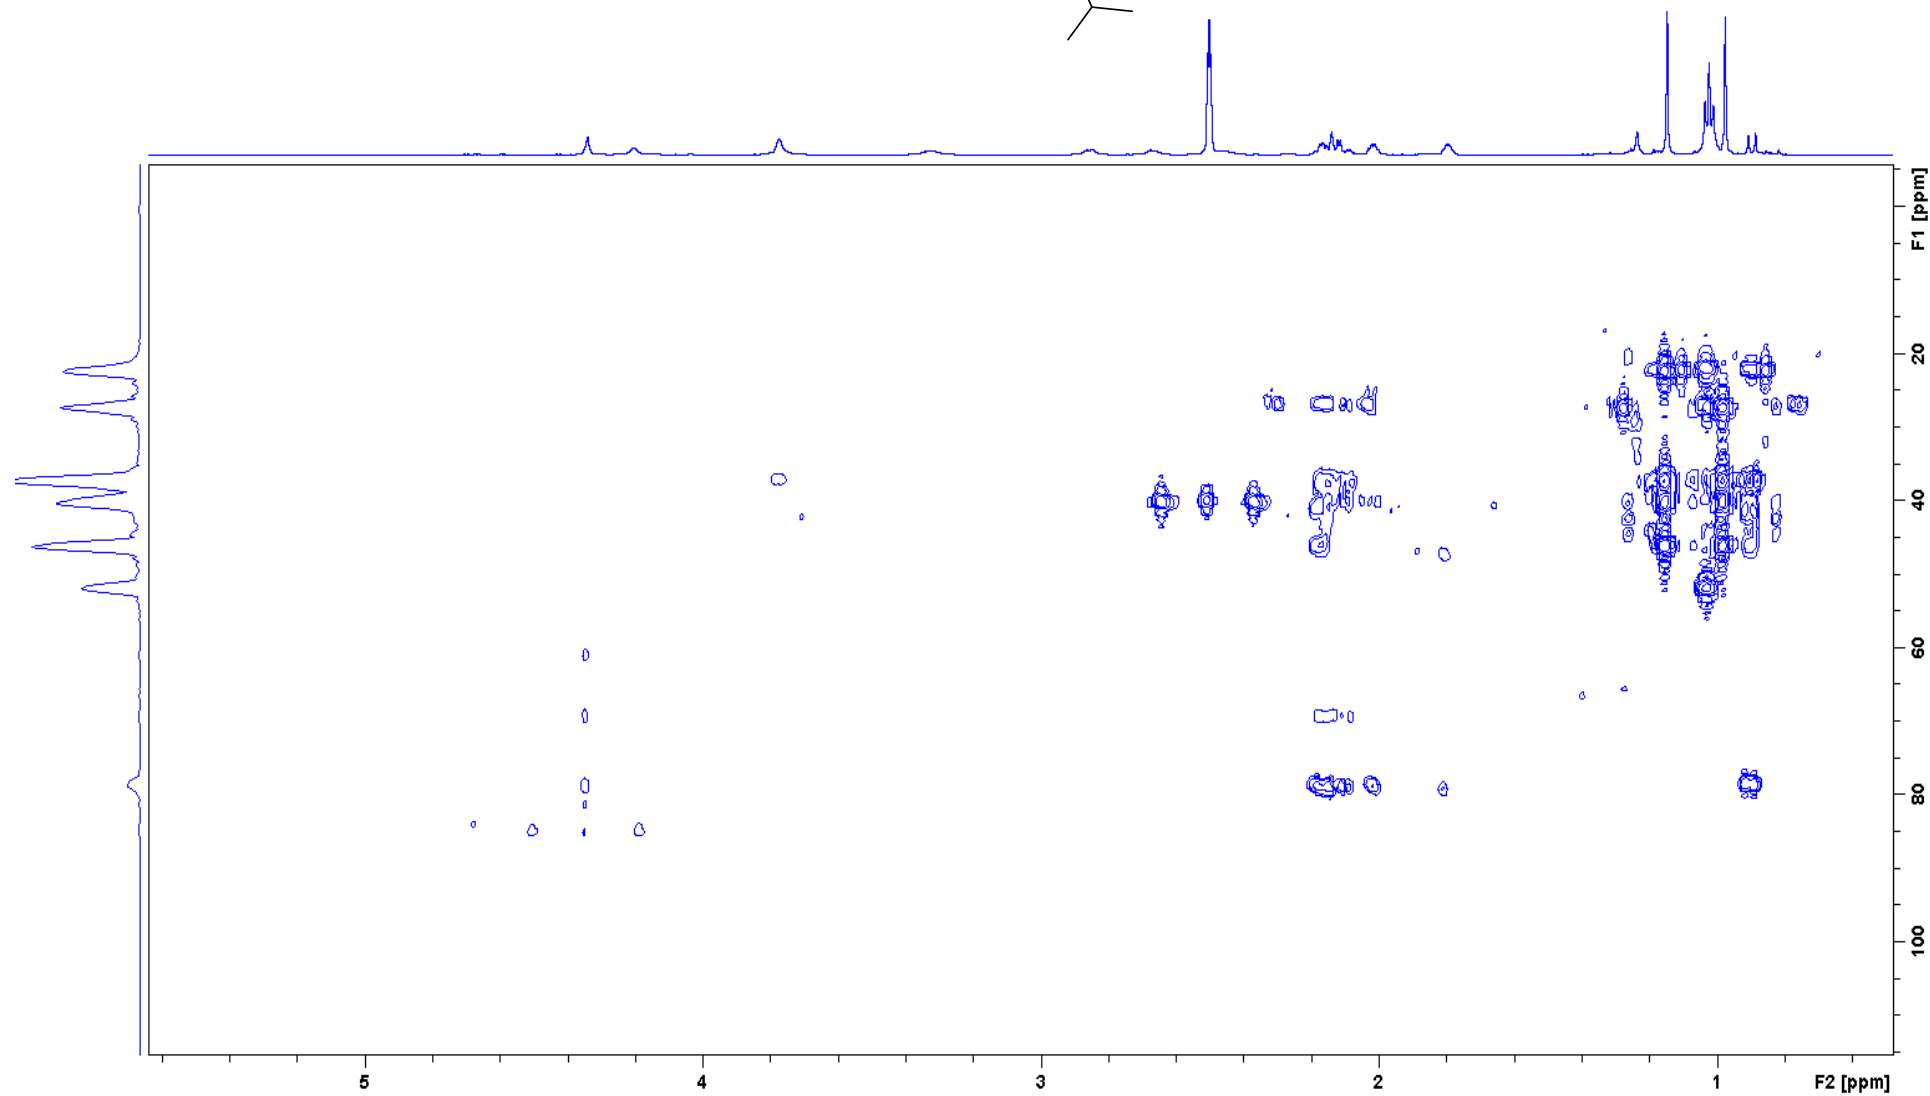

COSY for compound **16**

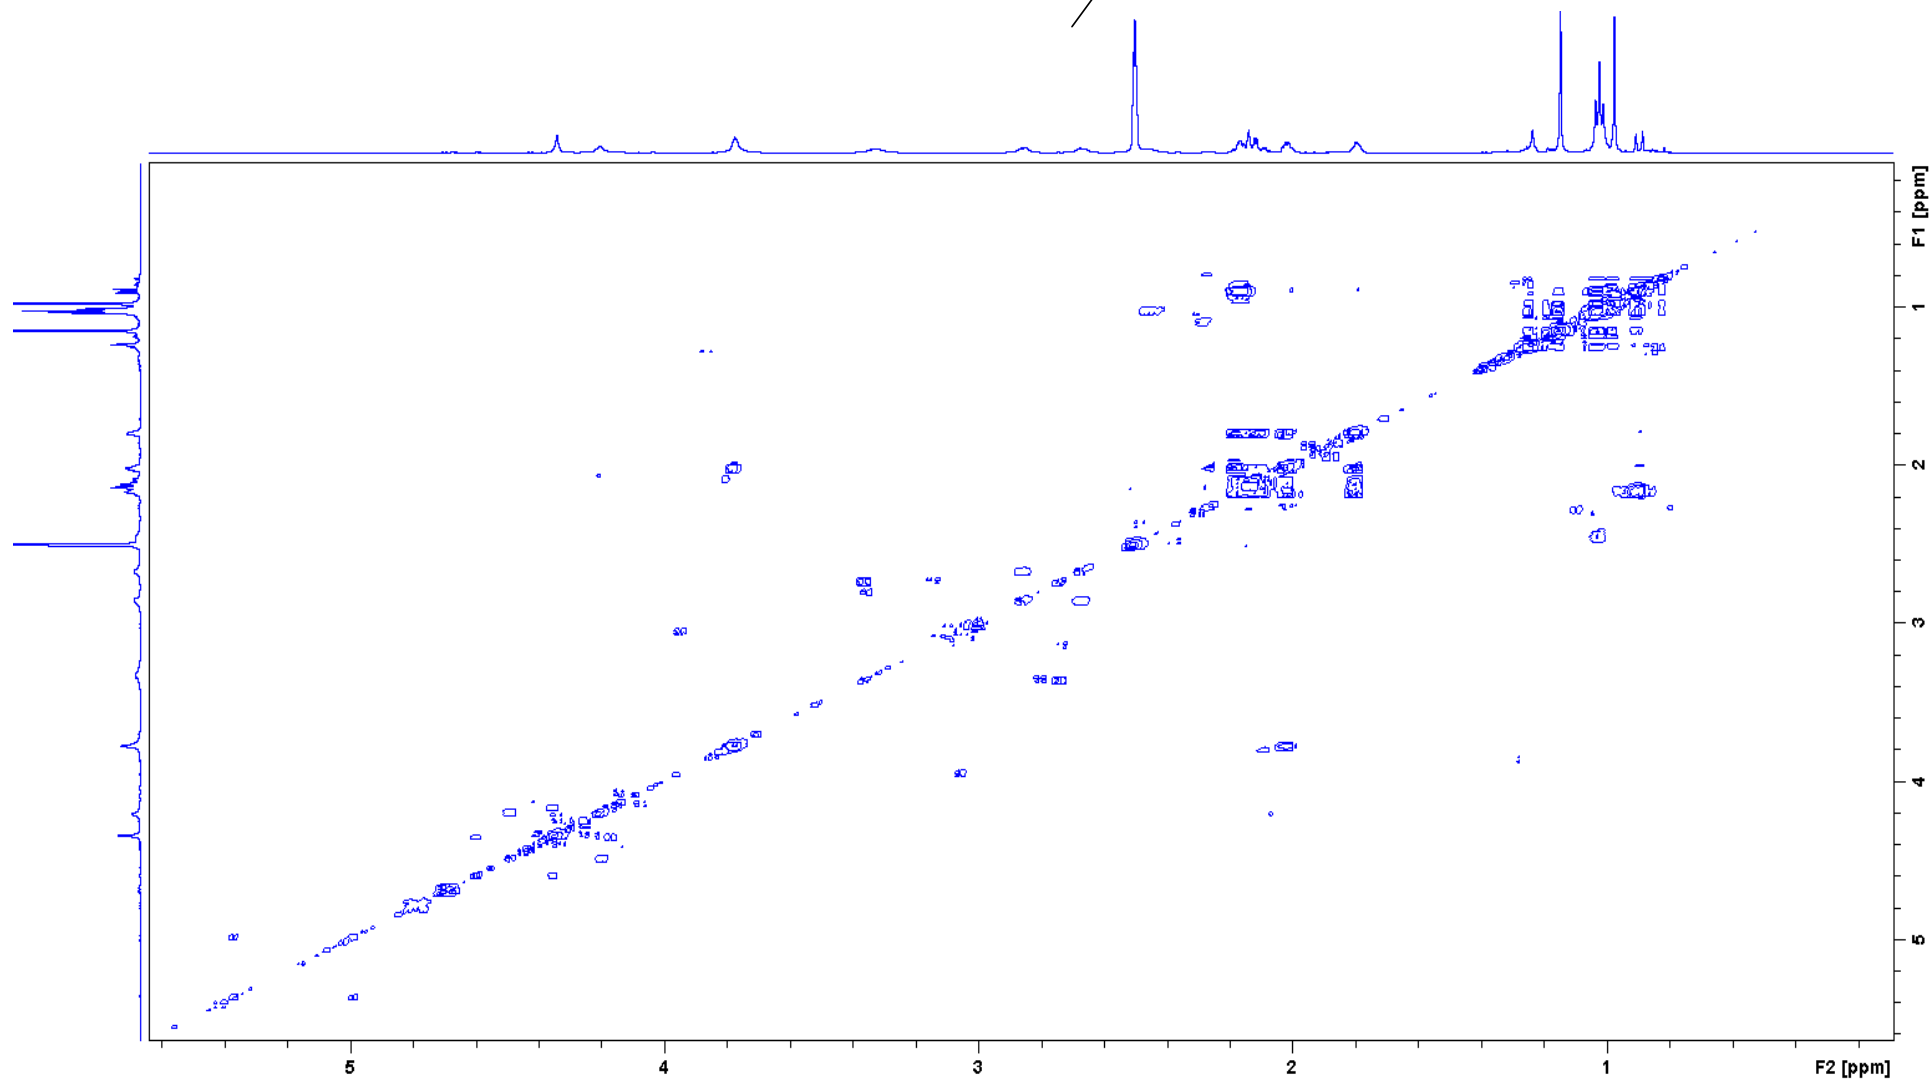

NOESY for compound **16**

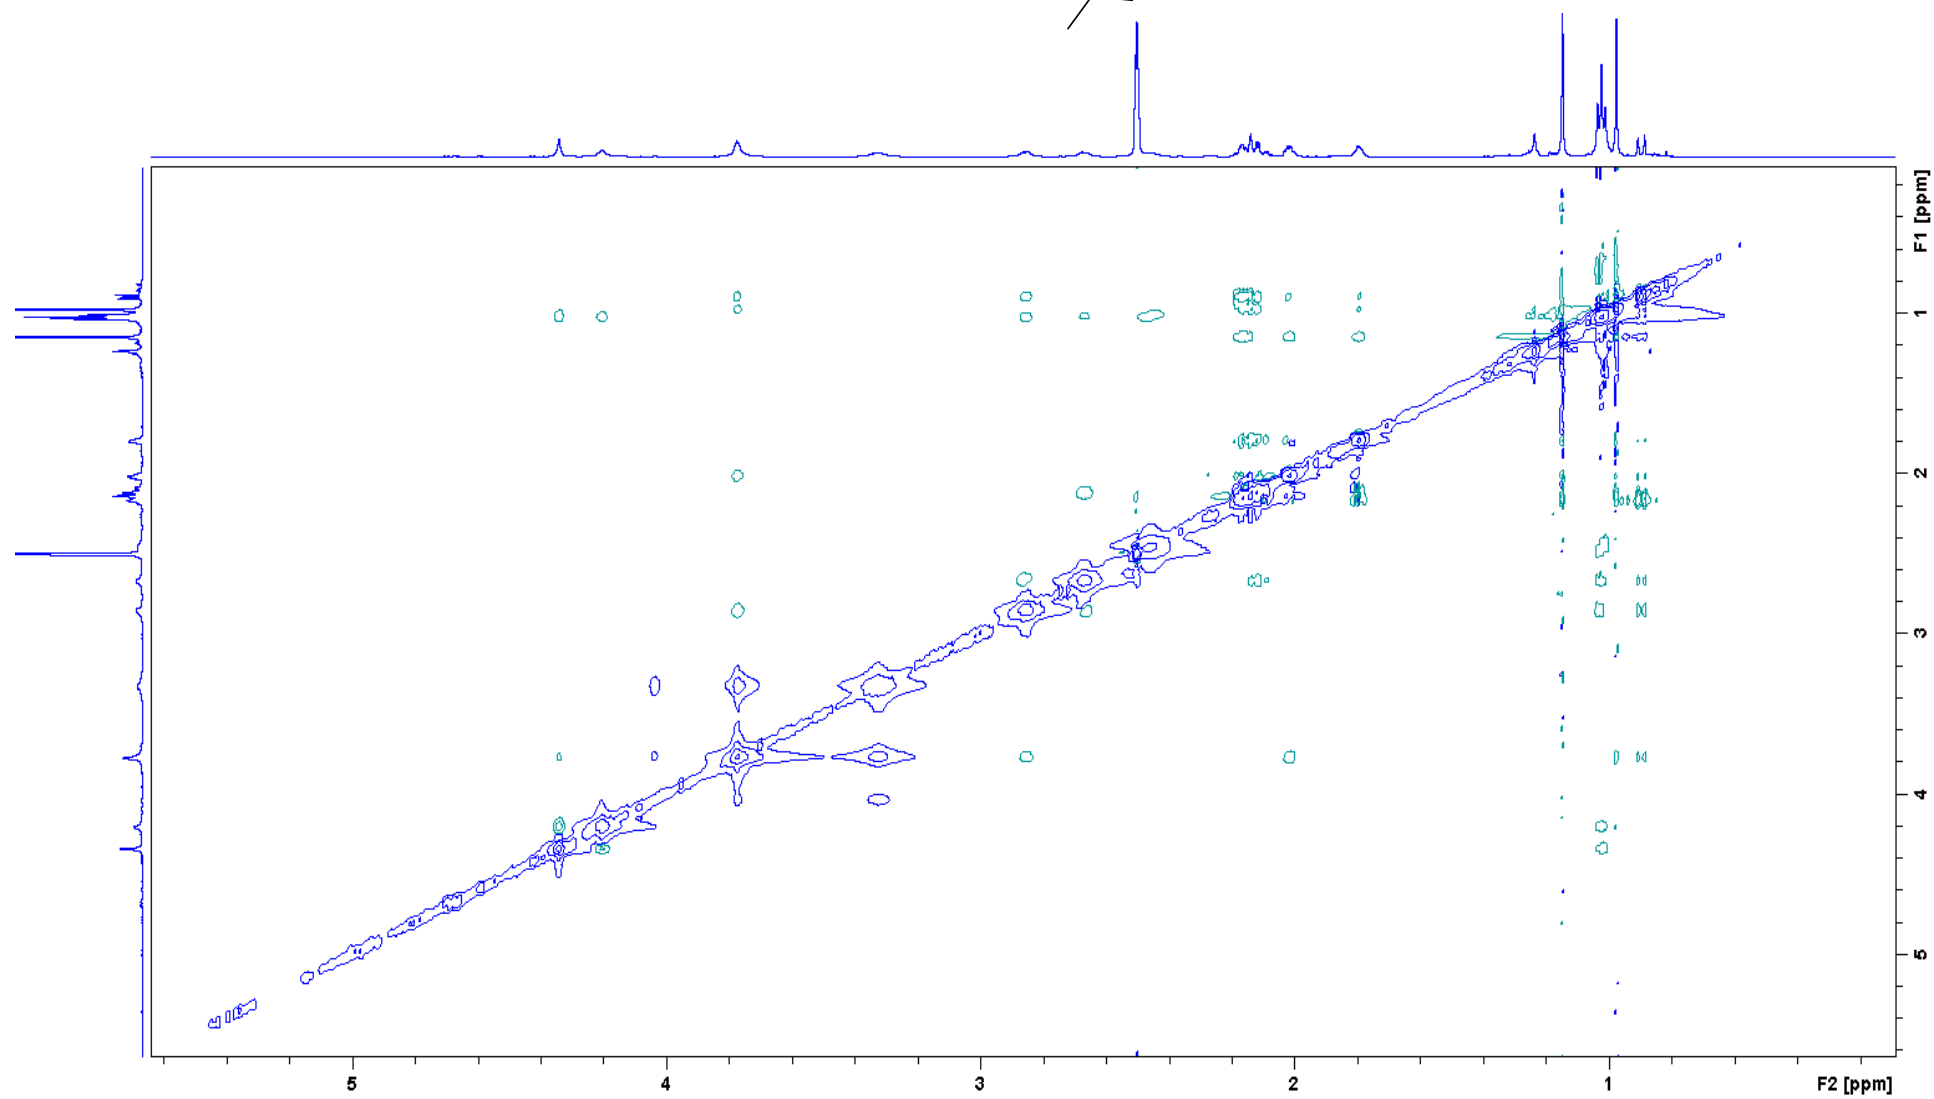

<sup>1</sup>H-NMR for compound **18**

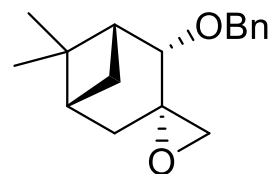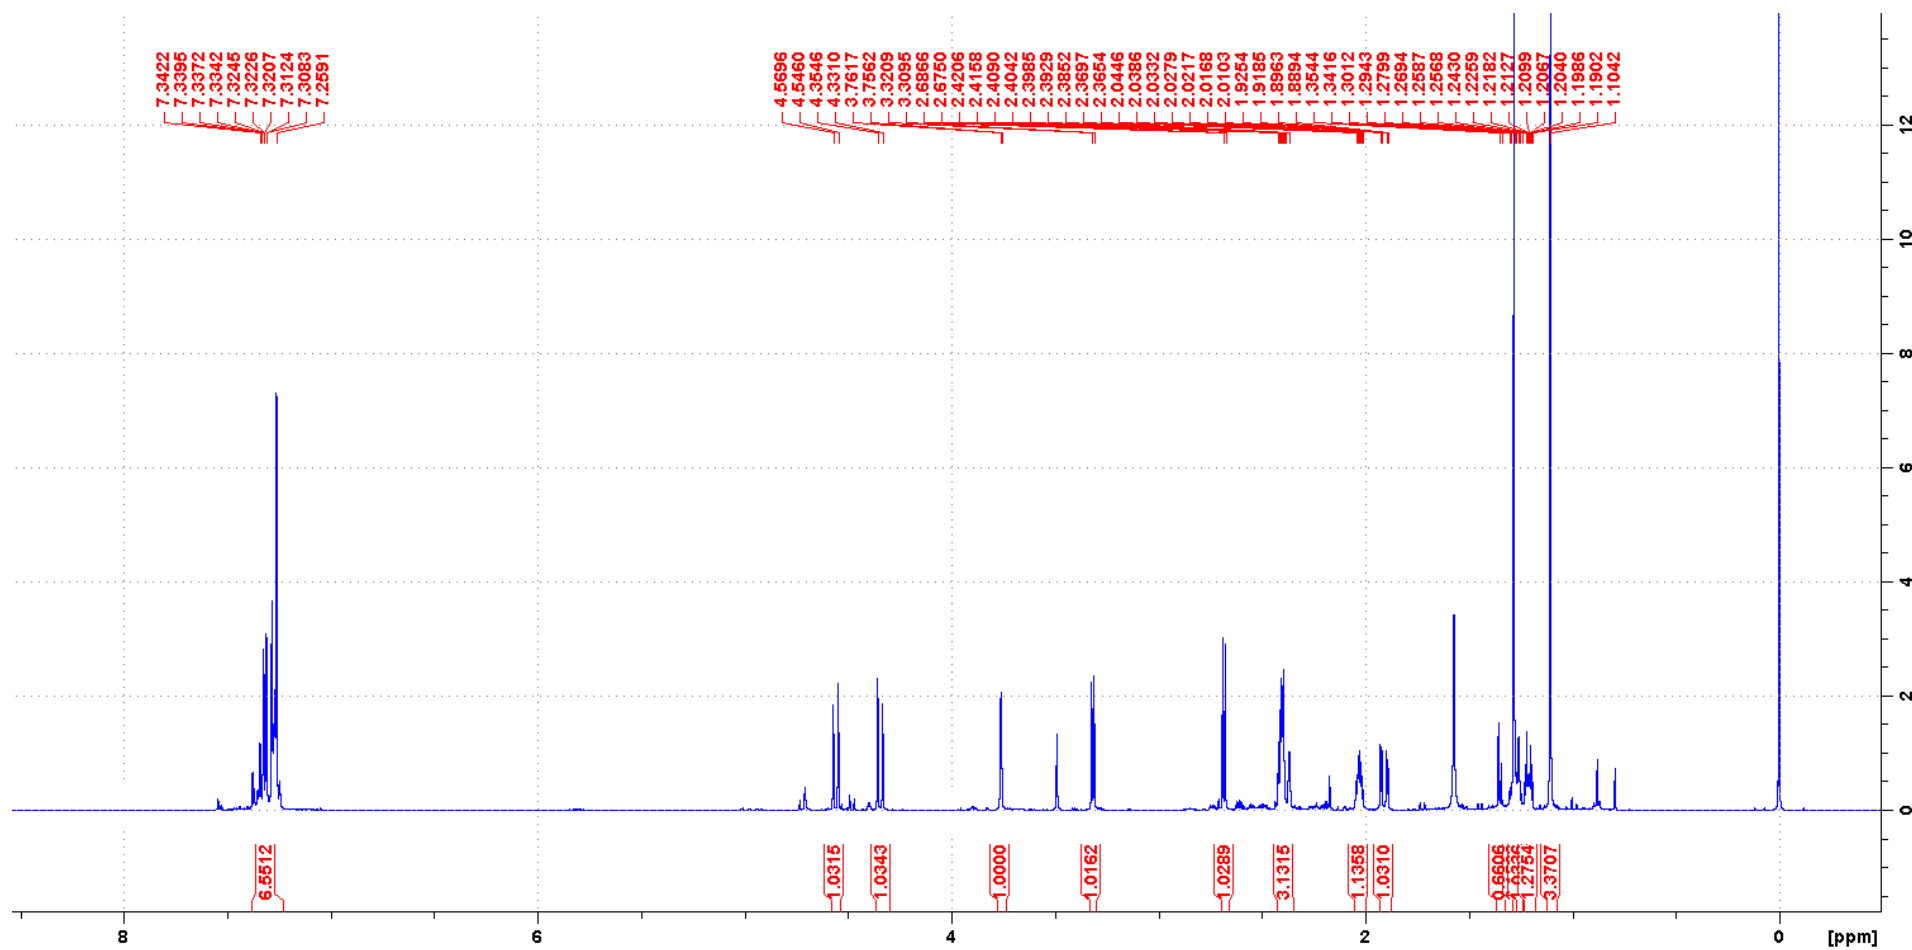

$^{13}\text{C}$ -NMR for compound **18**

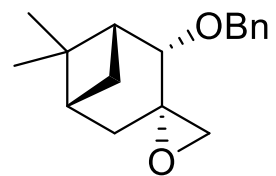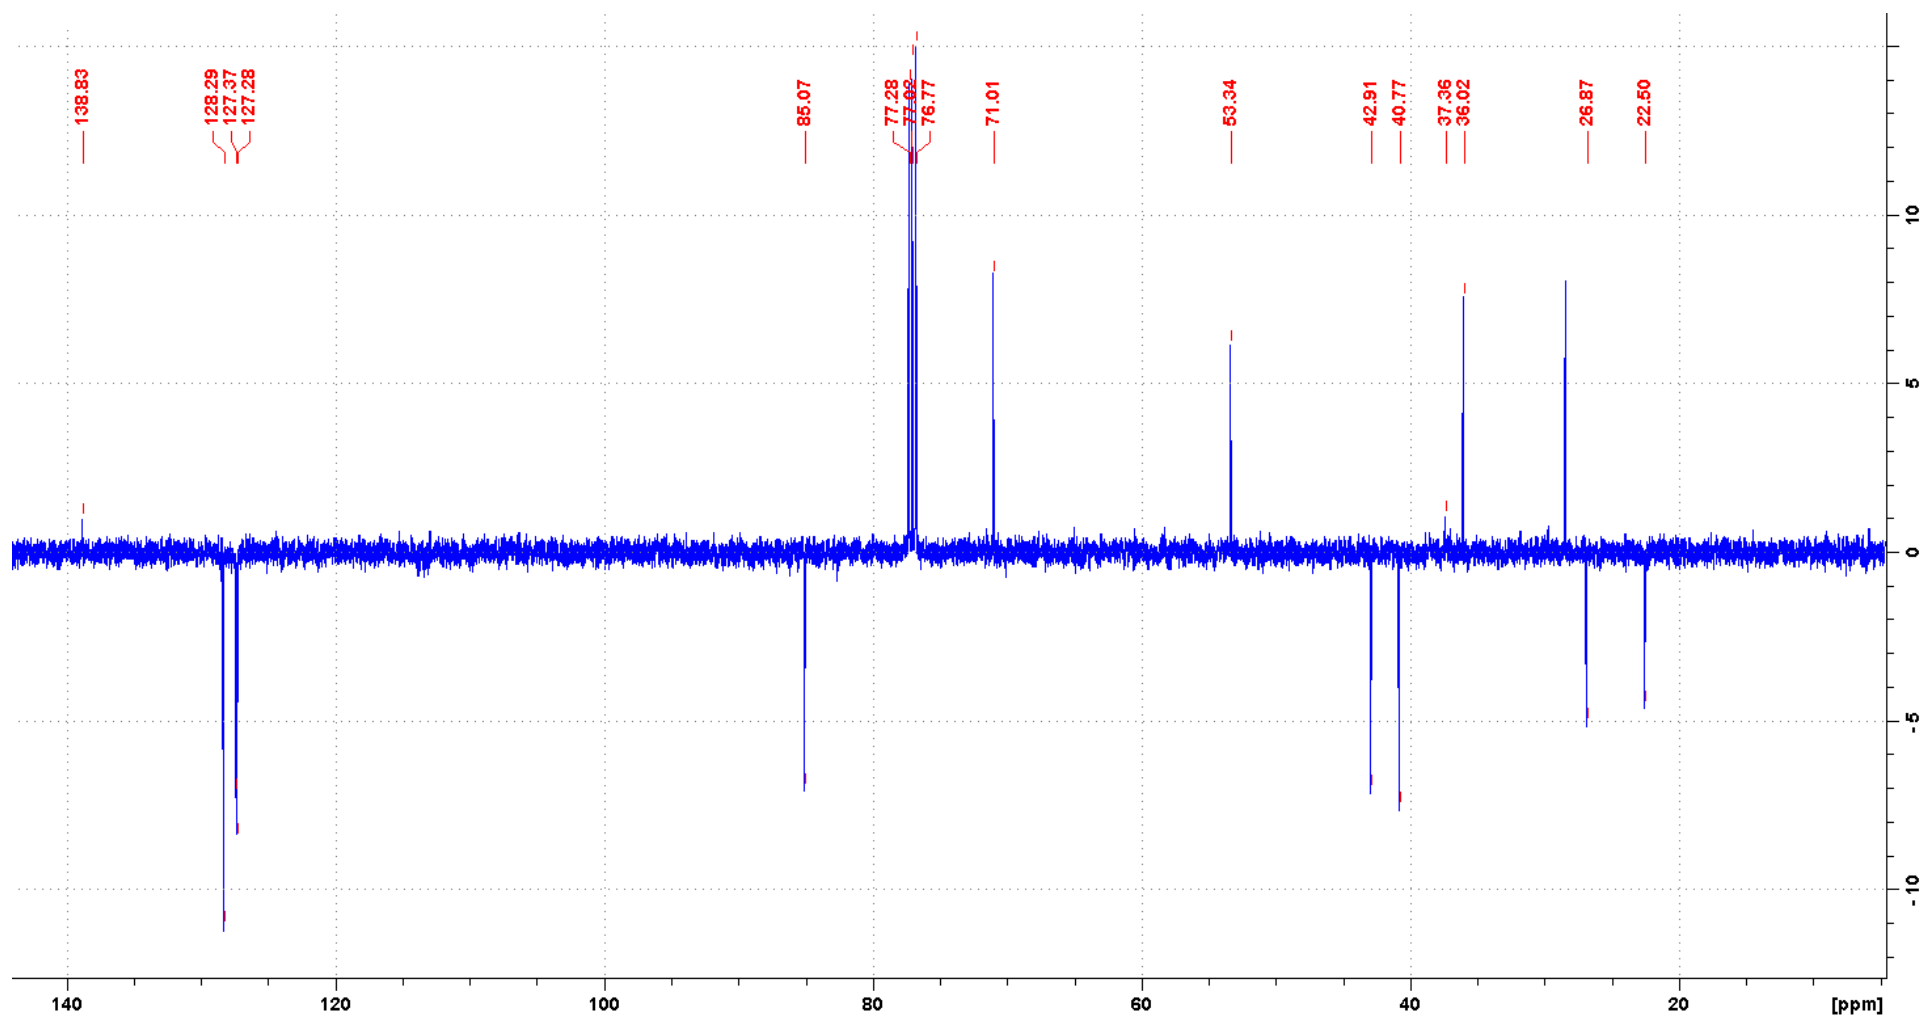

<sup>1</sup>H-NMR for compound **19**

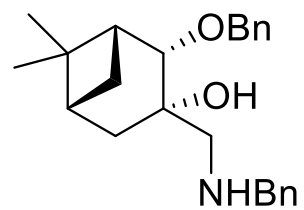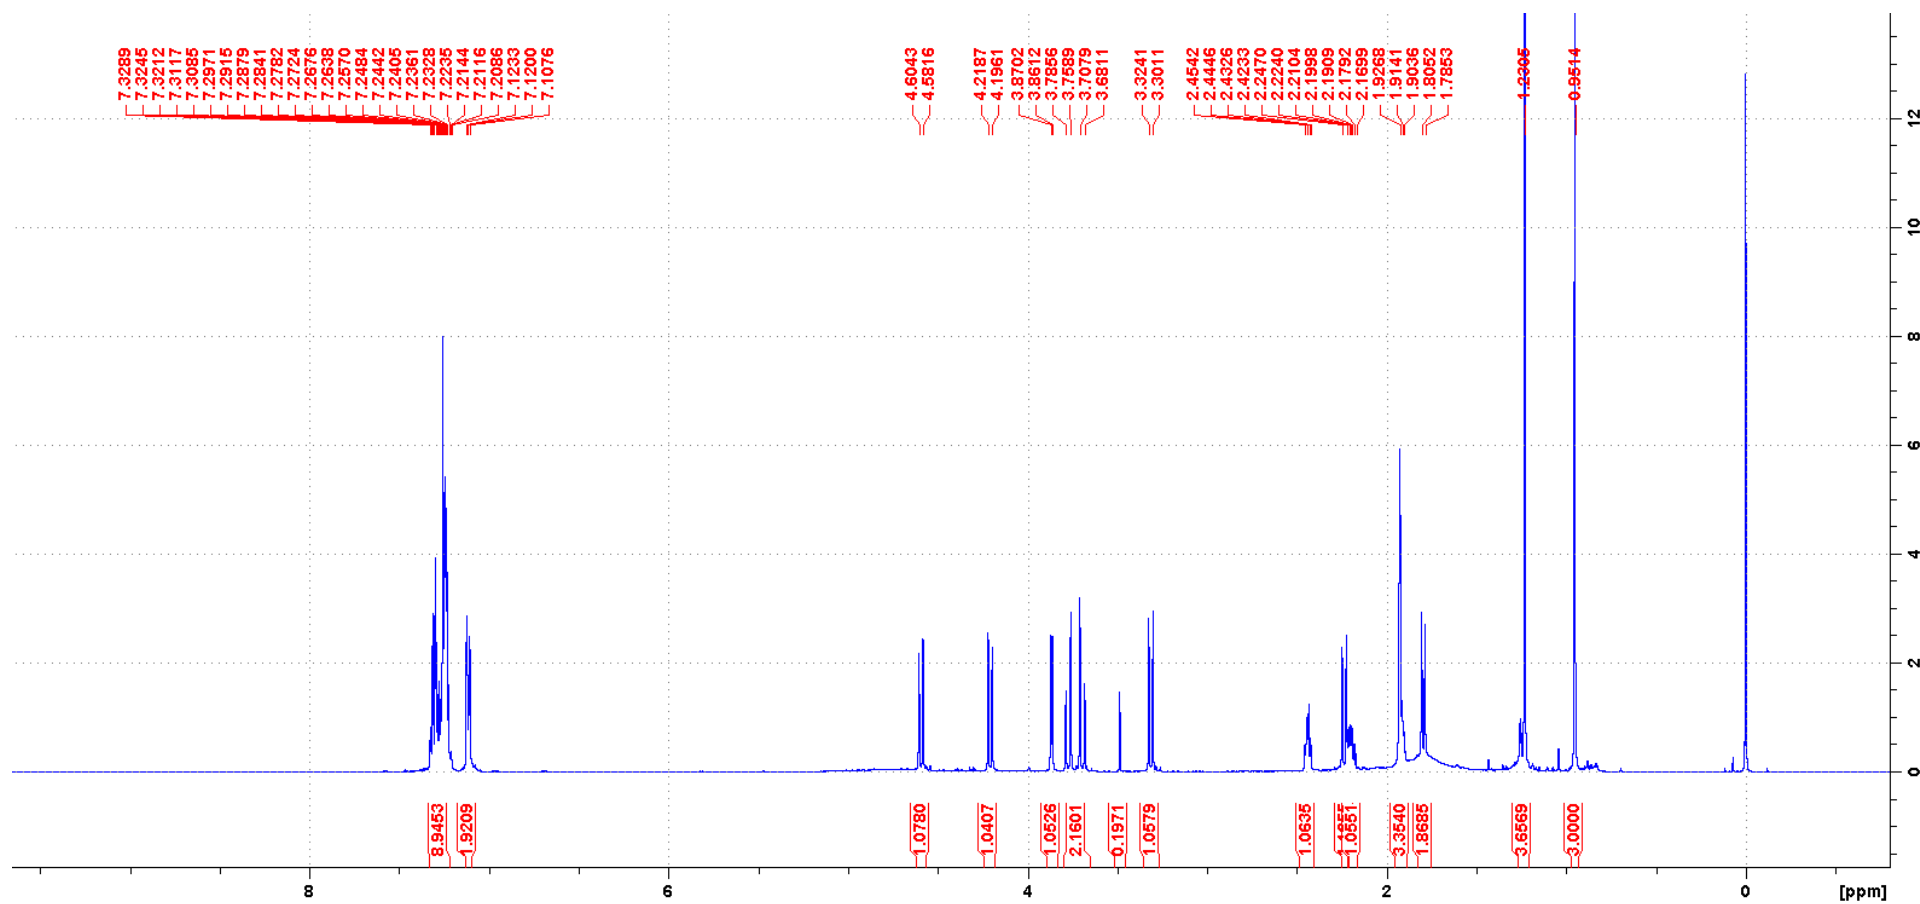

$^{13}\text{C}$ -NMR for compound **19**

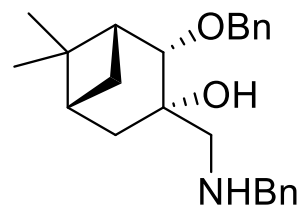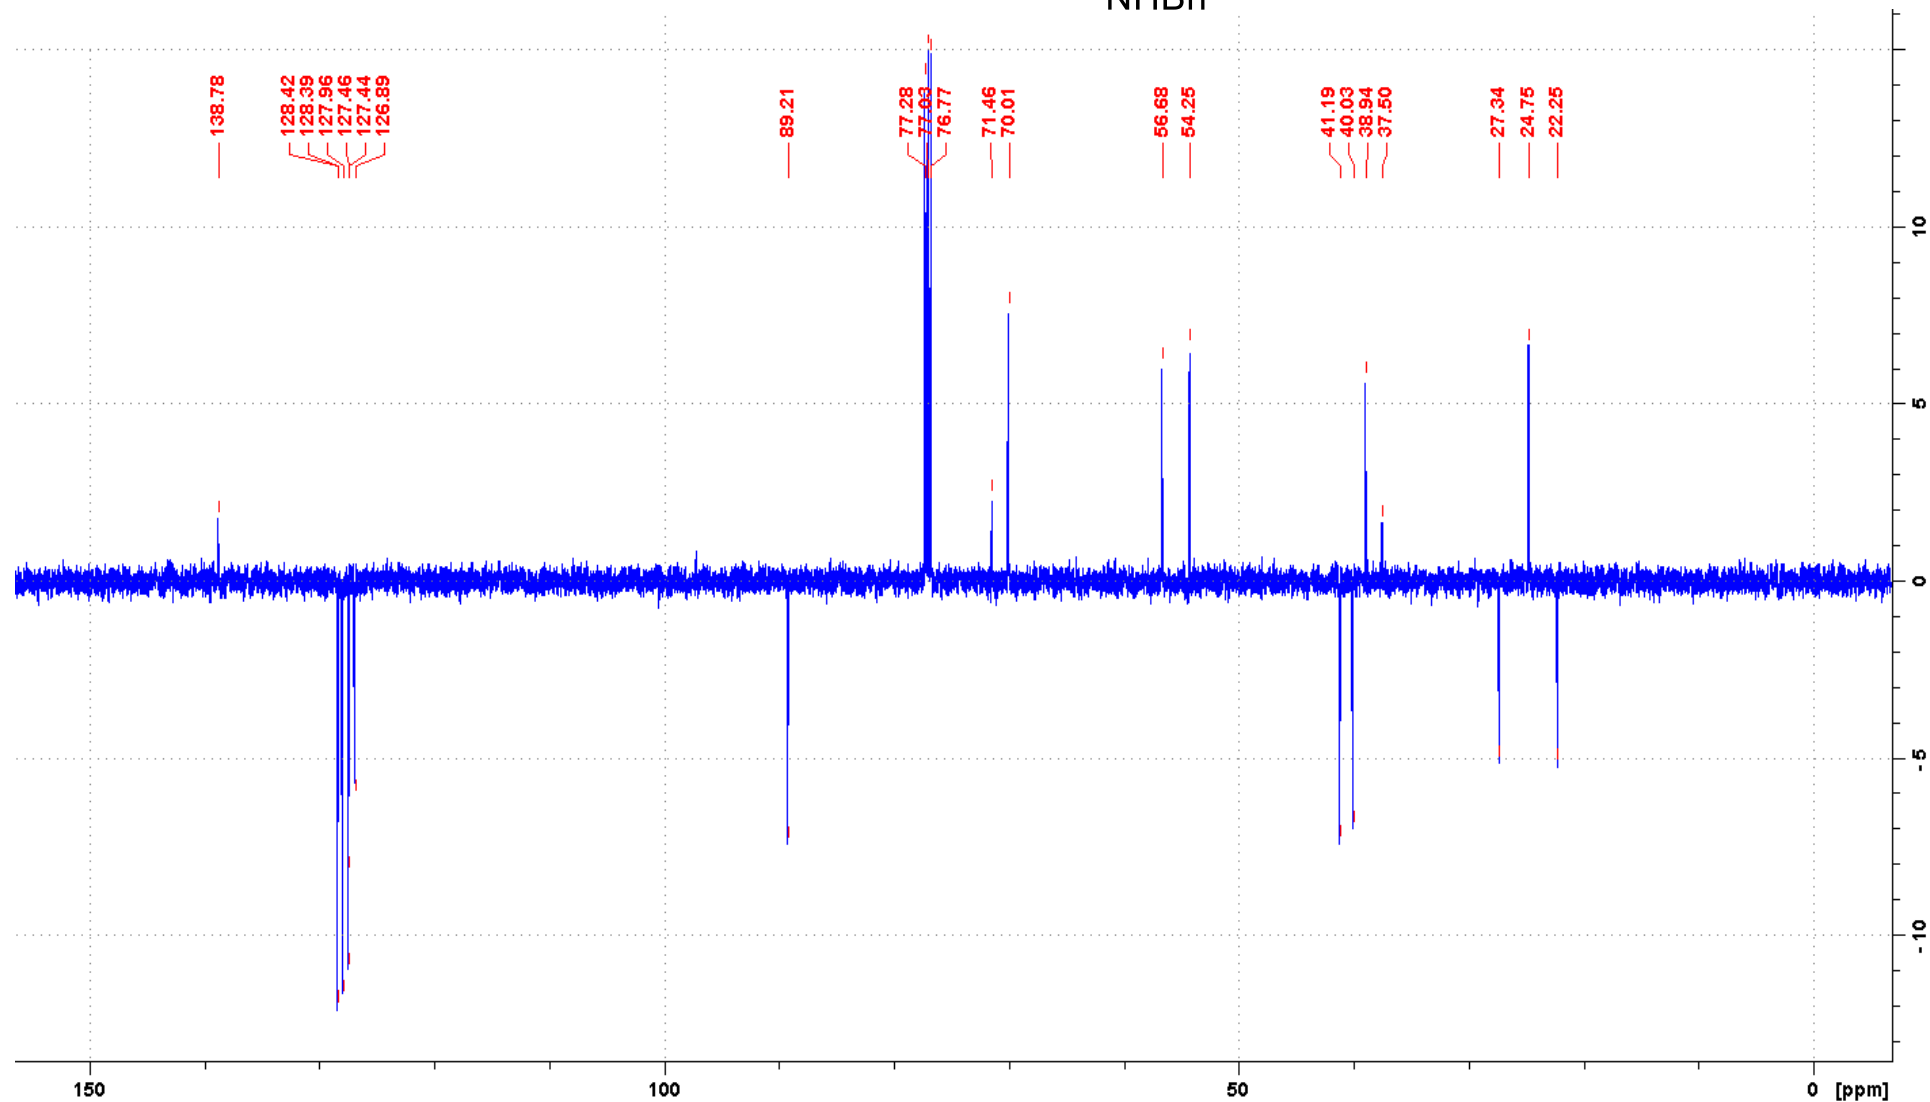

<sup>1</sup>H-NMR for compound **20**

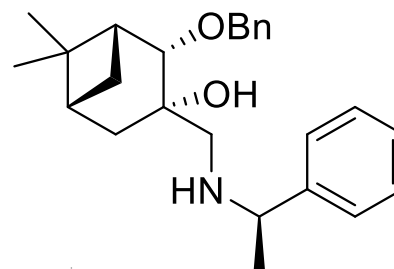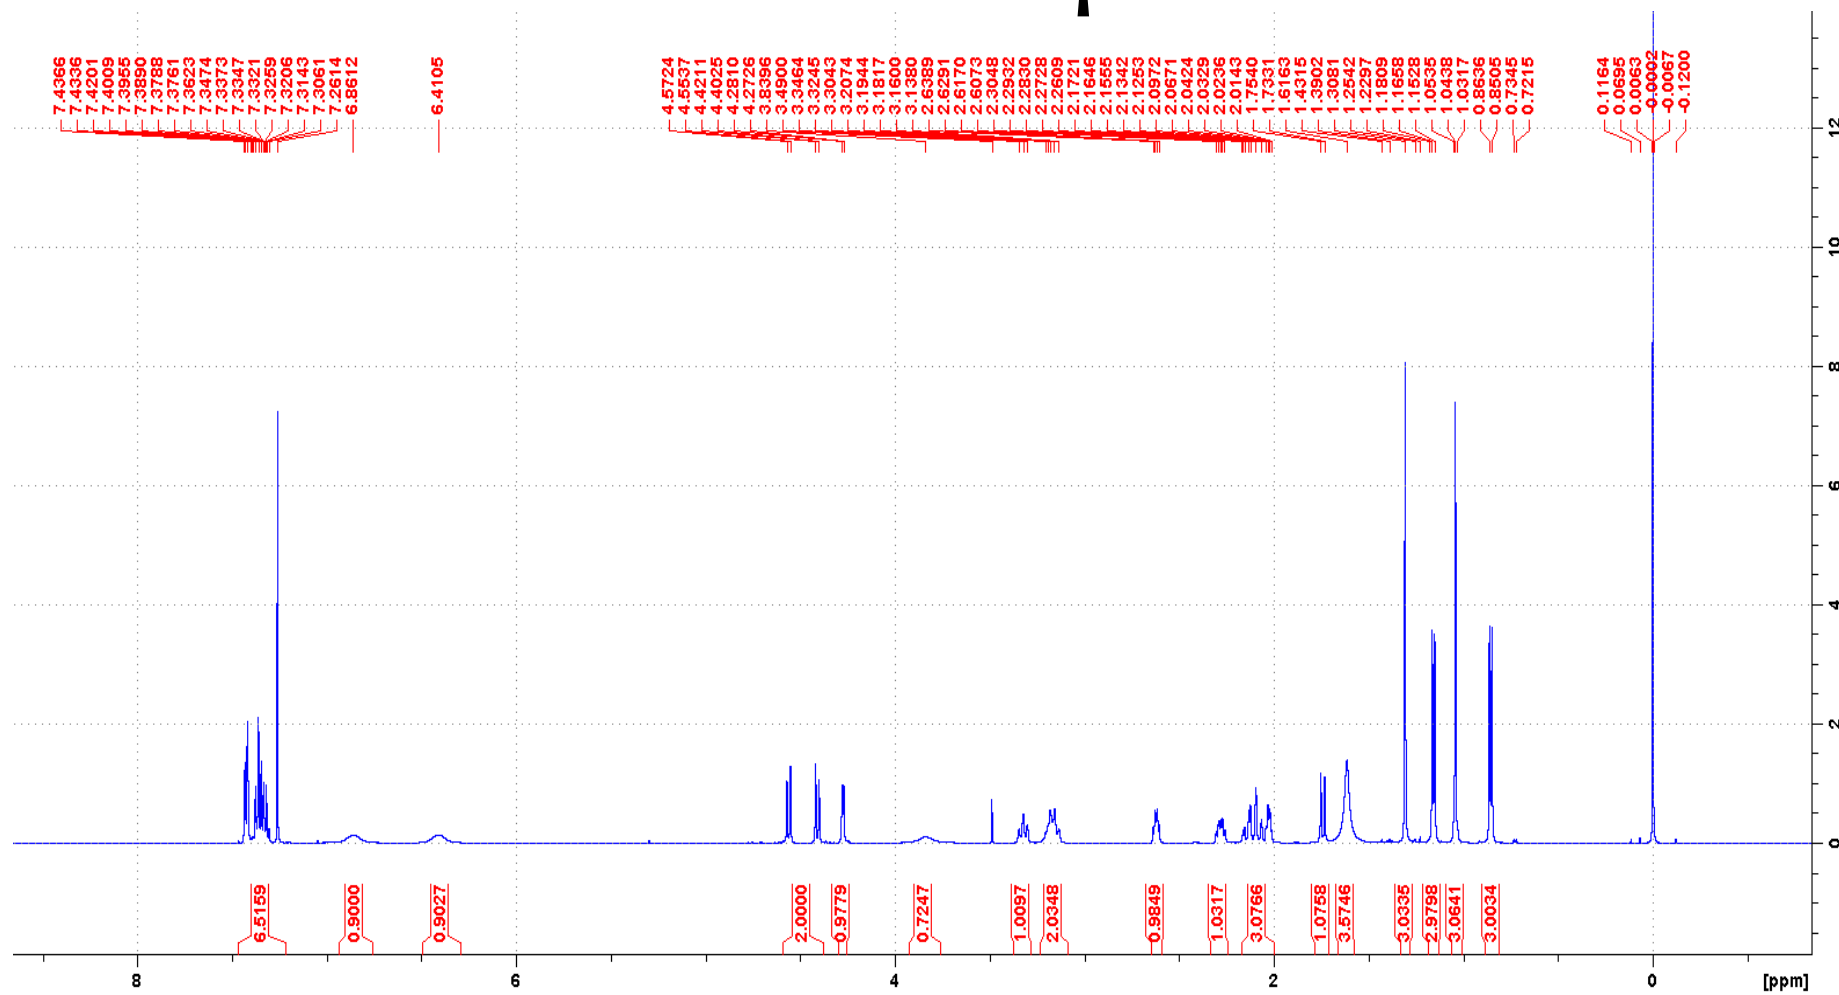



$^{13}\text{C}$ -NMR for compound **20**

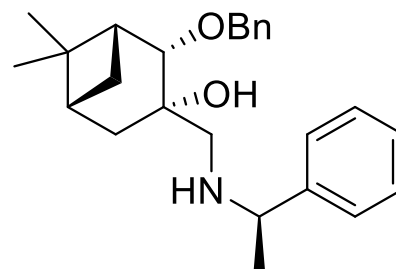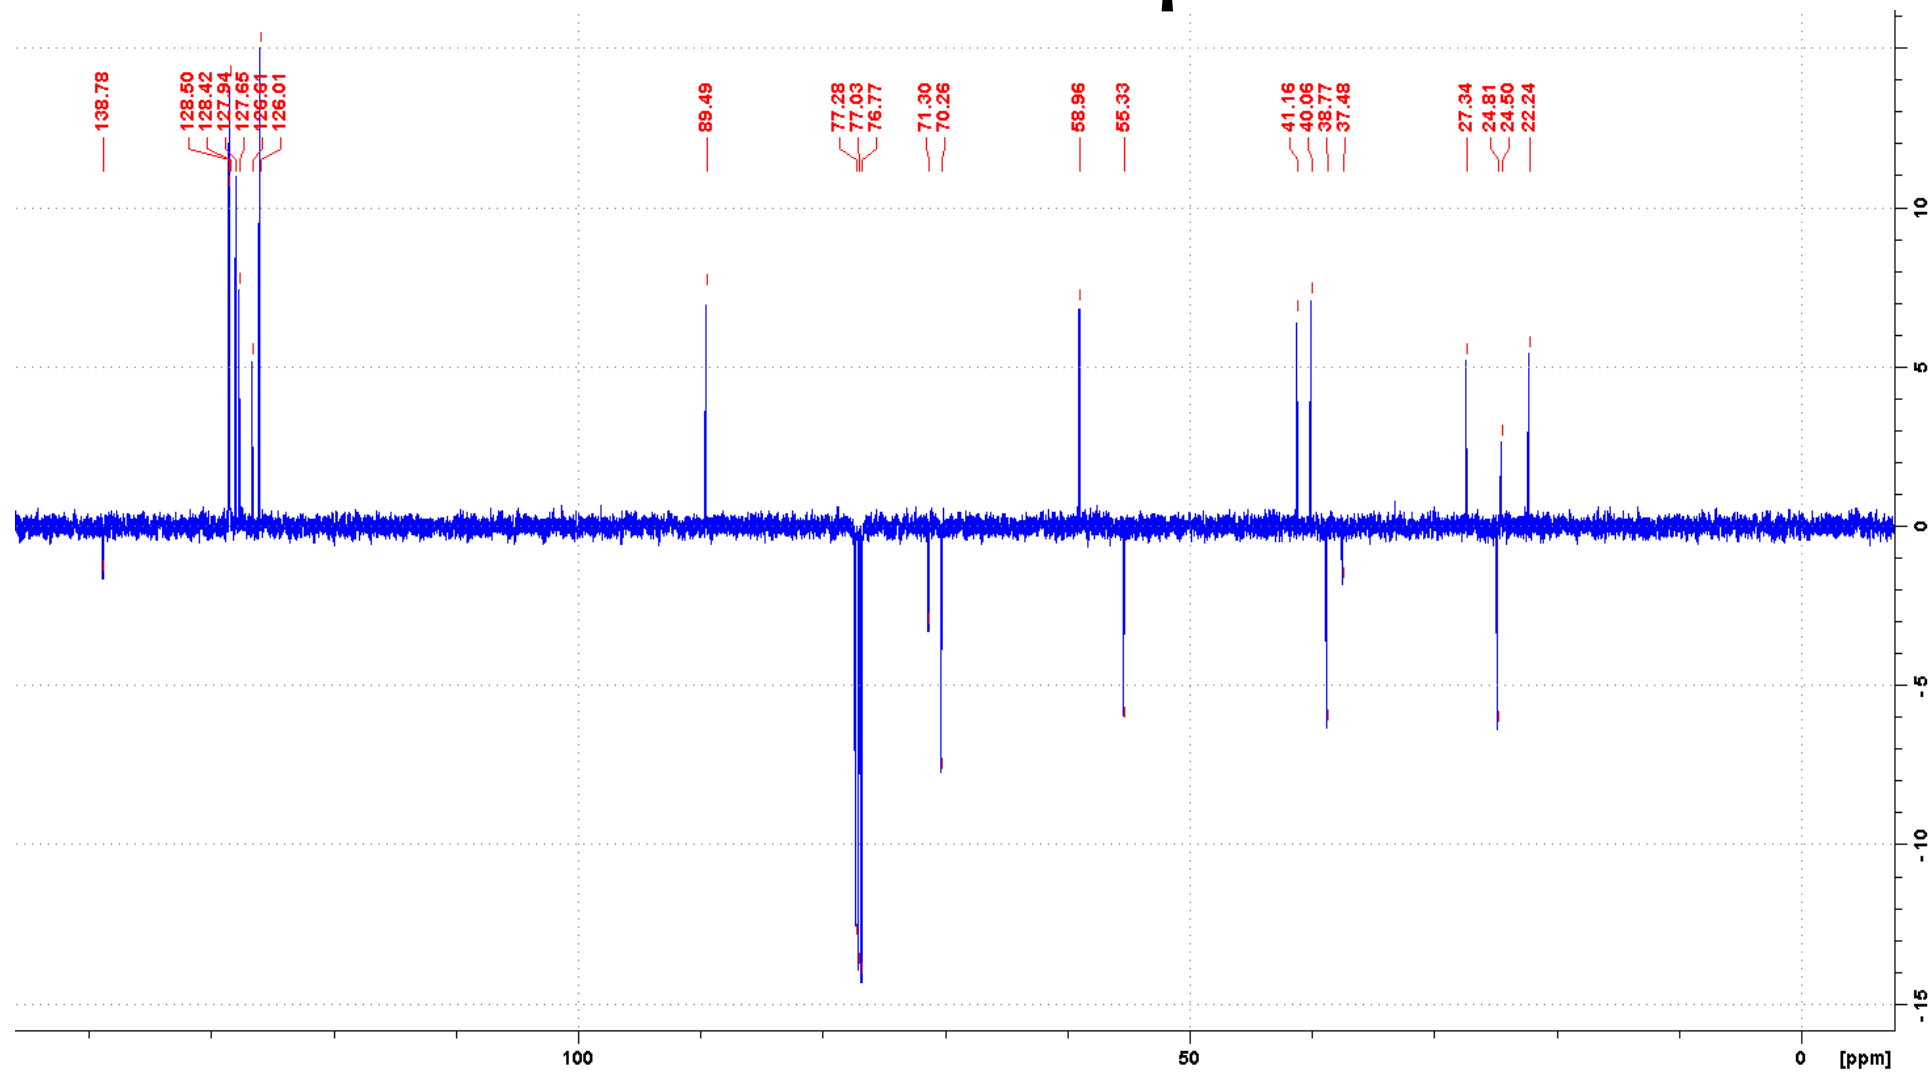

HSQC for compound **20**

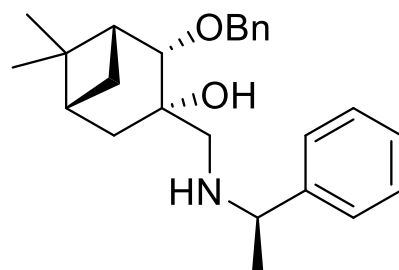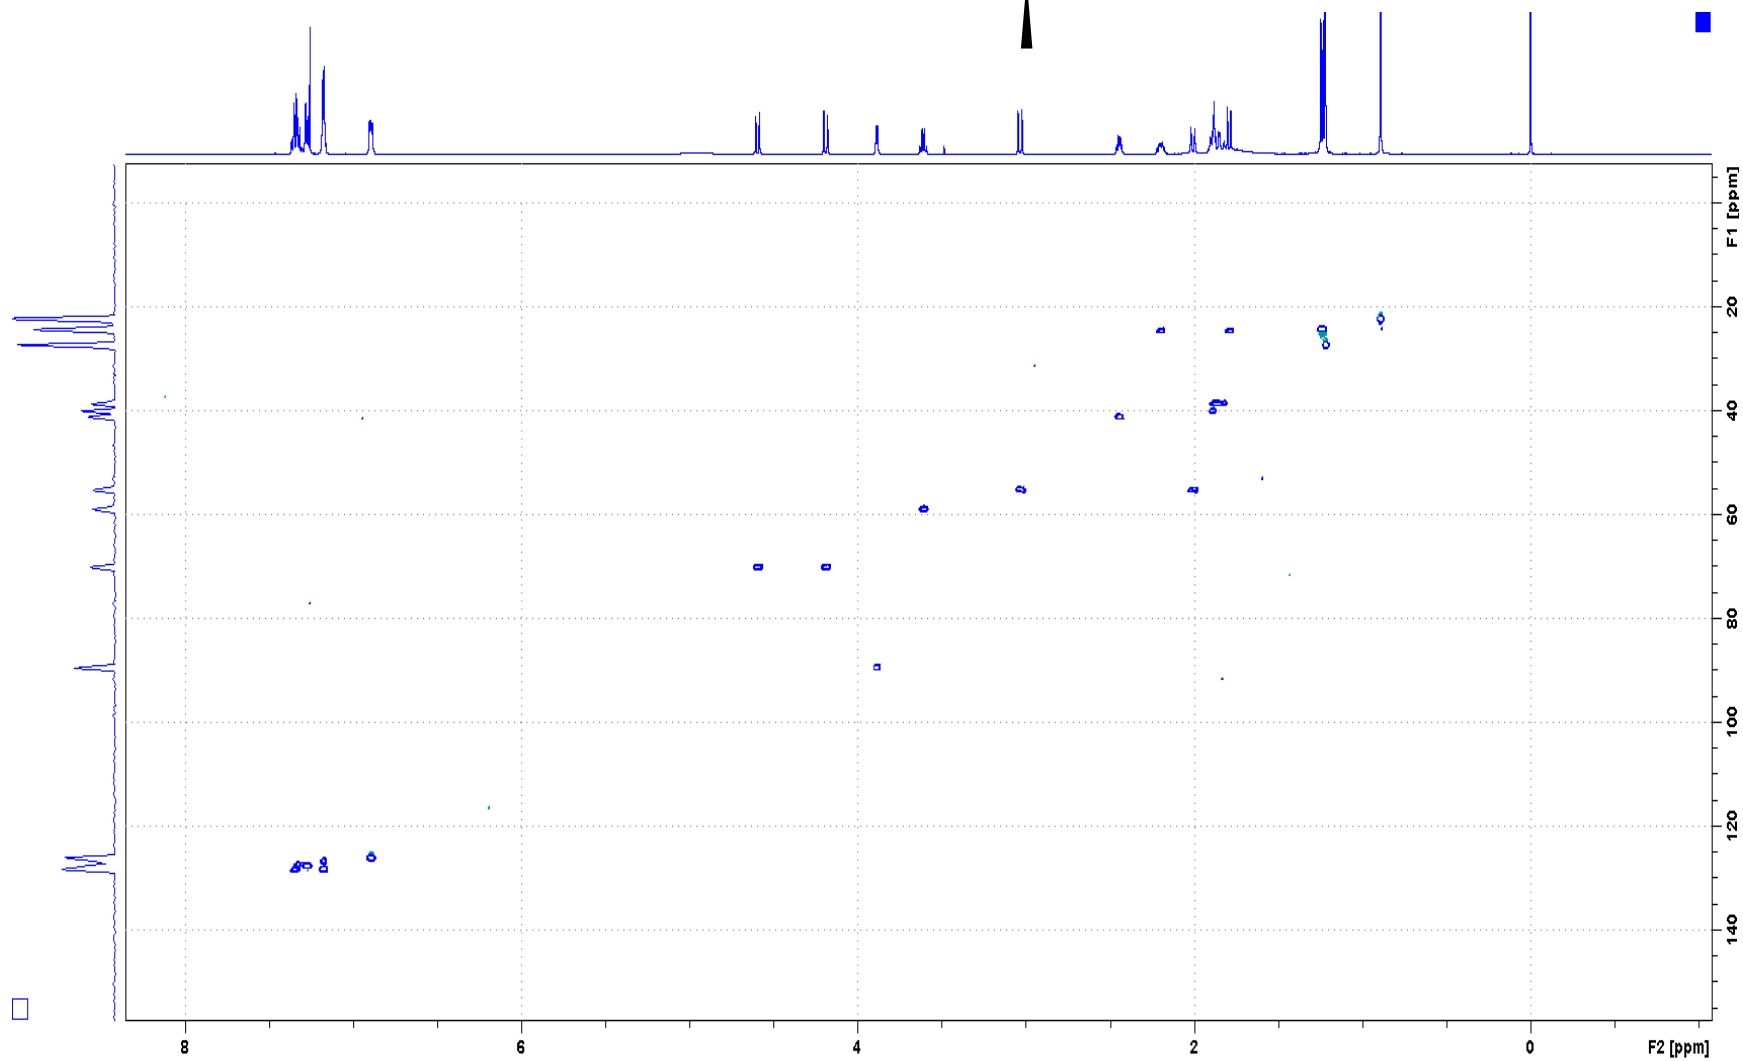

HMBC for compound **20**

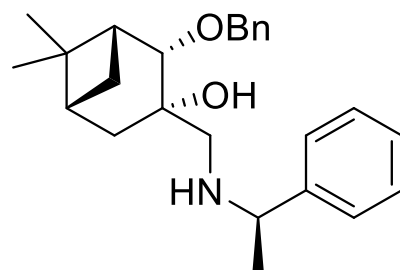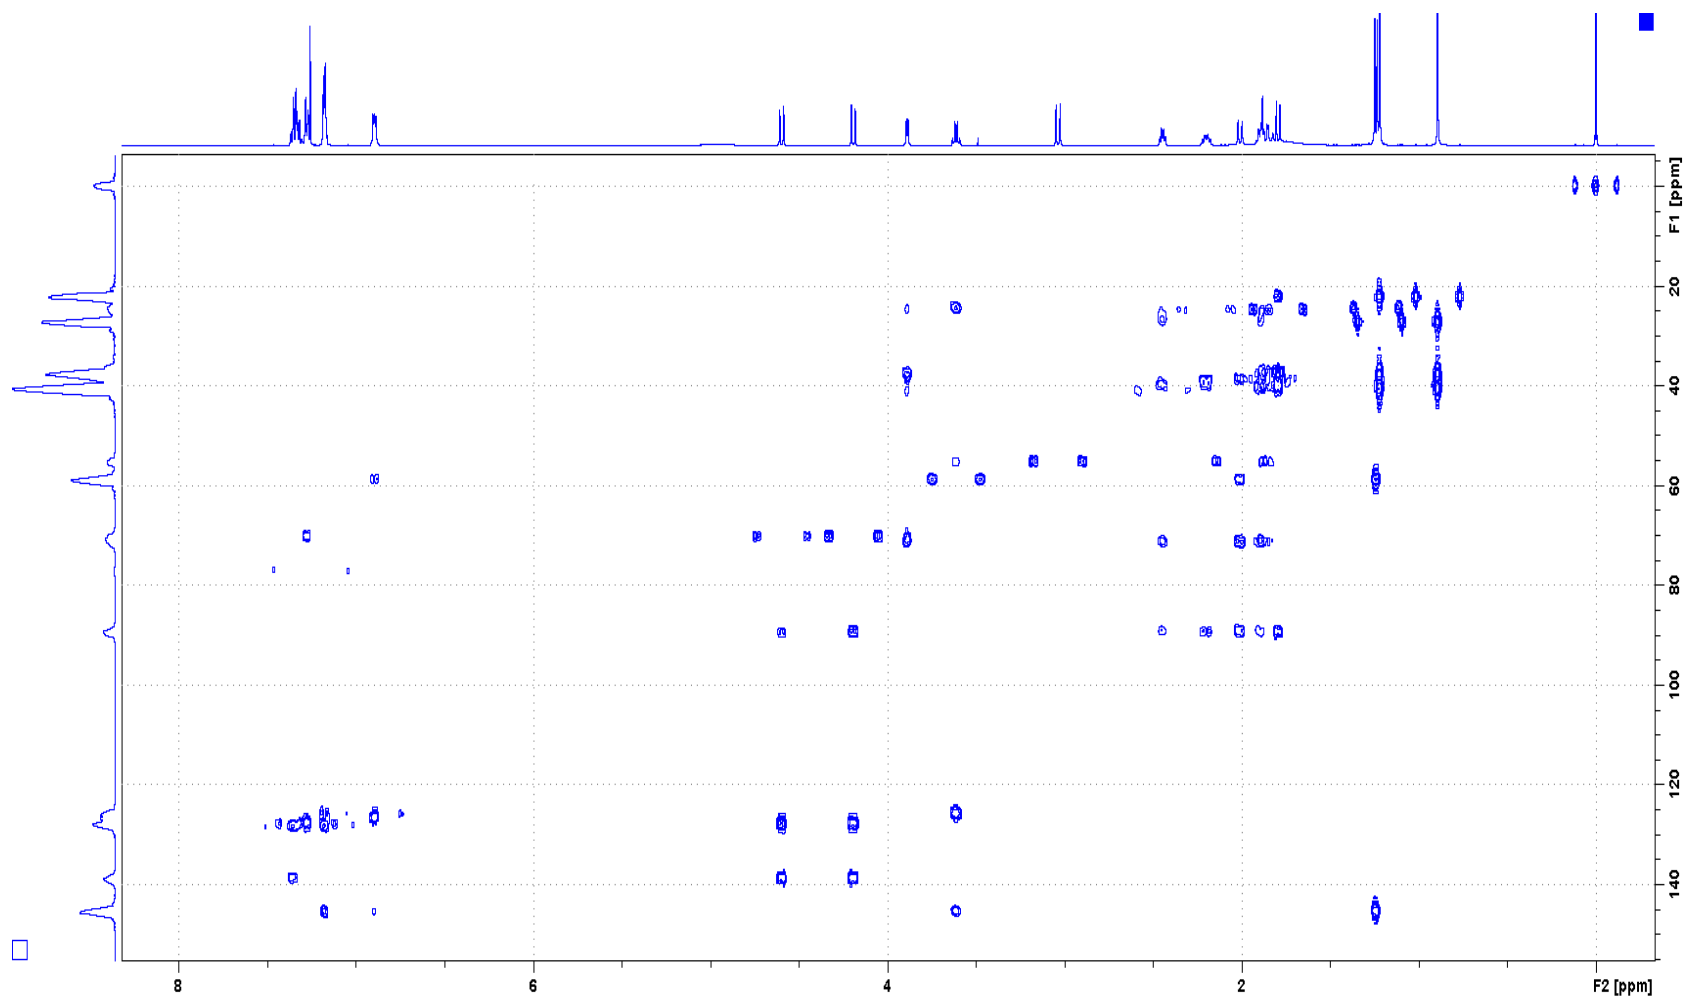

COSY for compound **20**

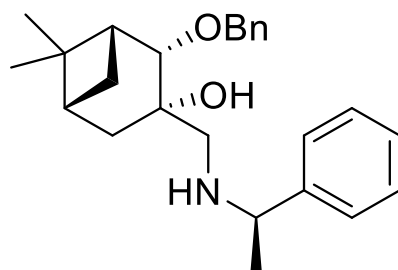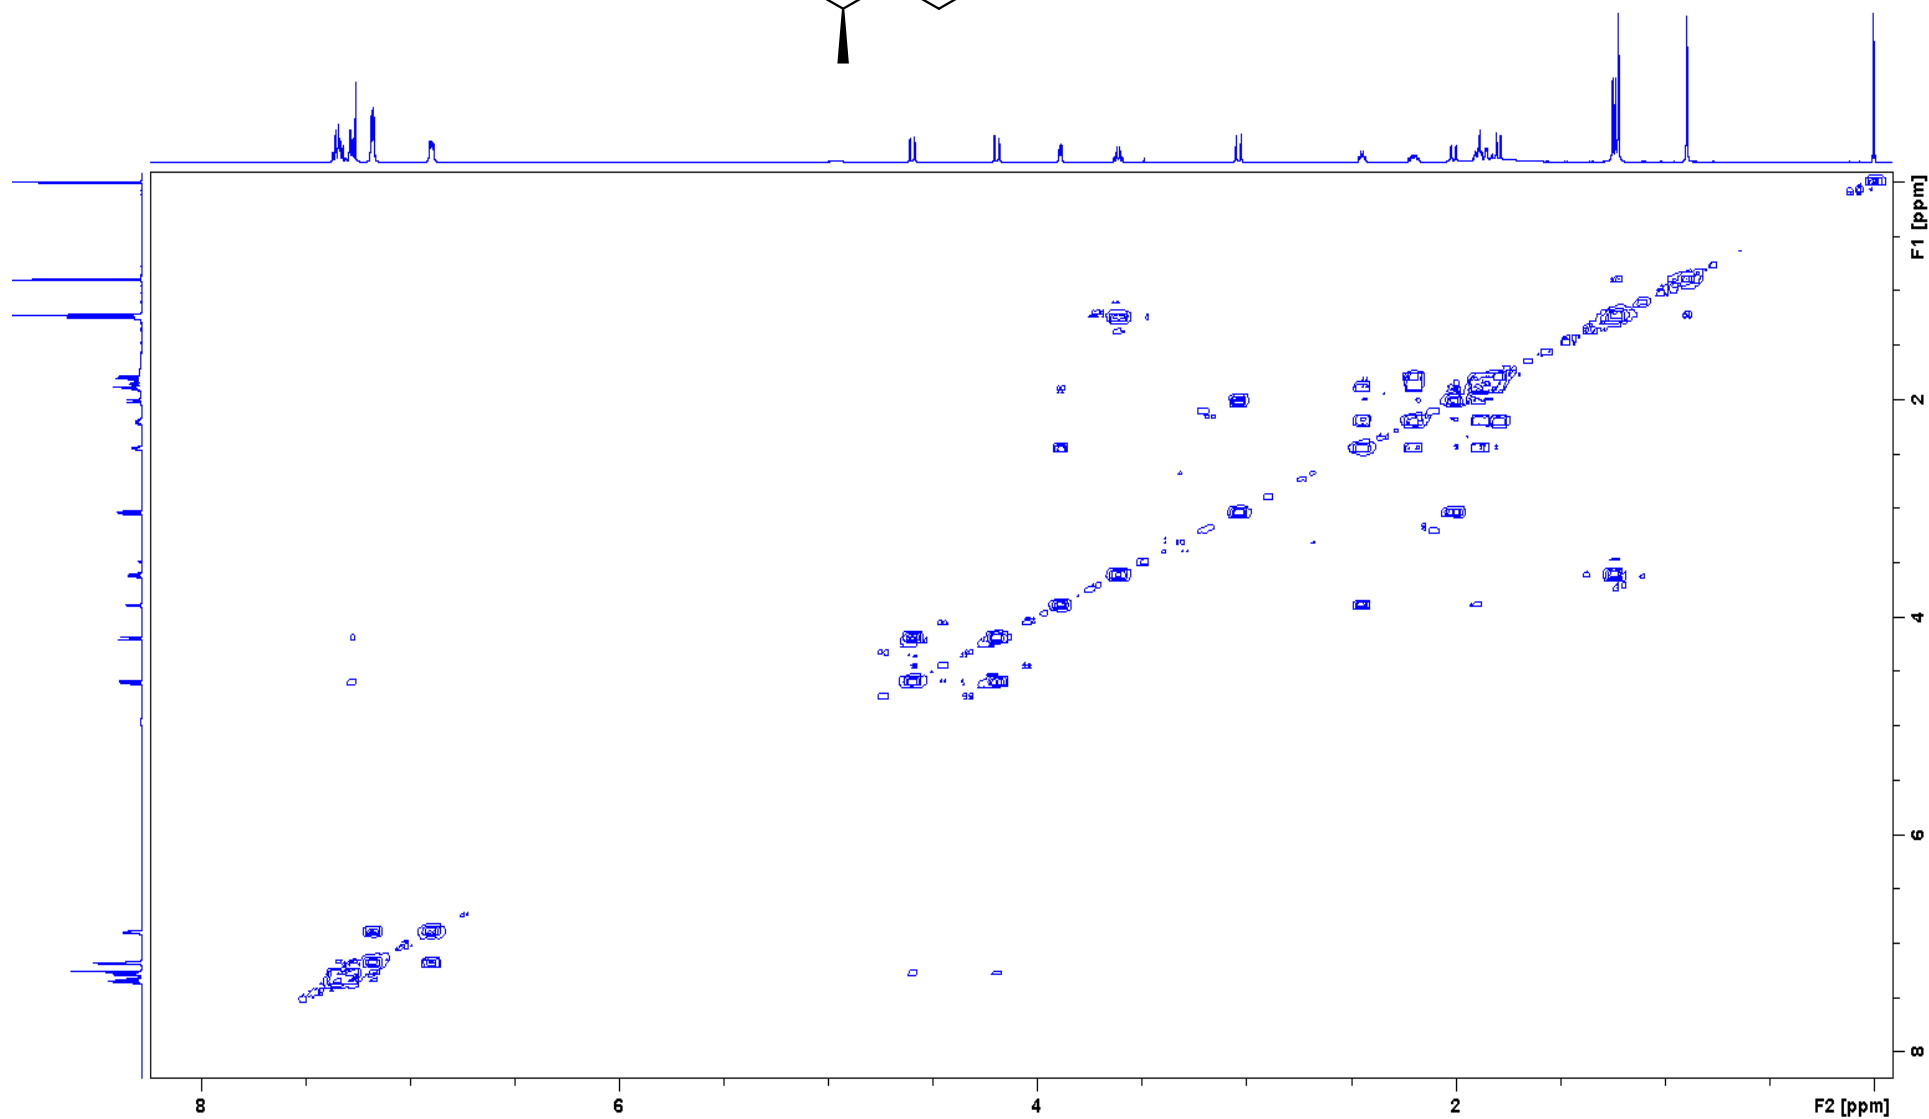

NOESY for compound **20**

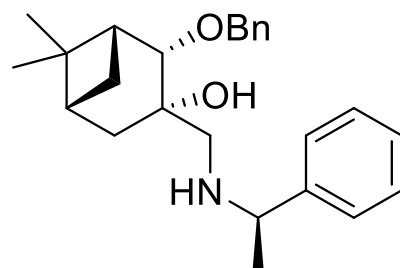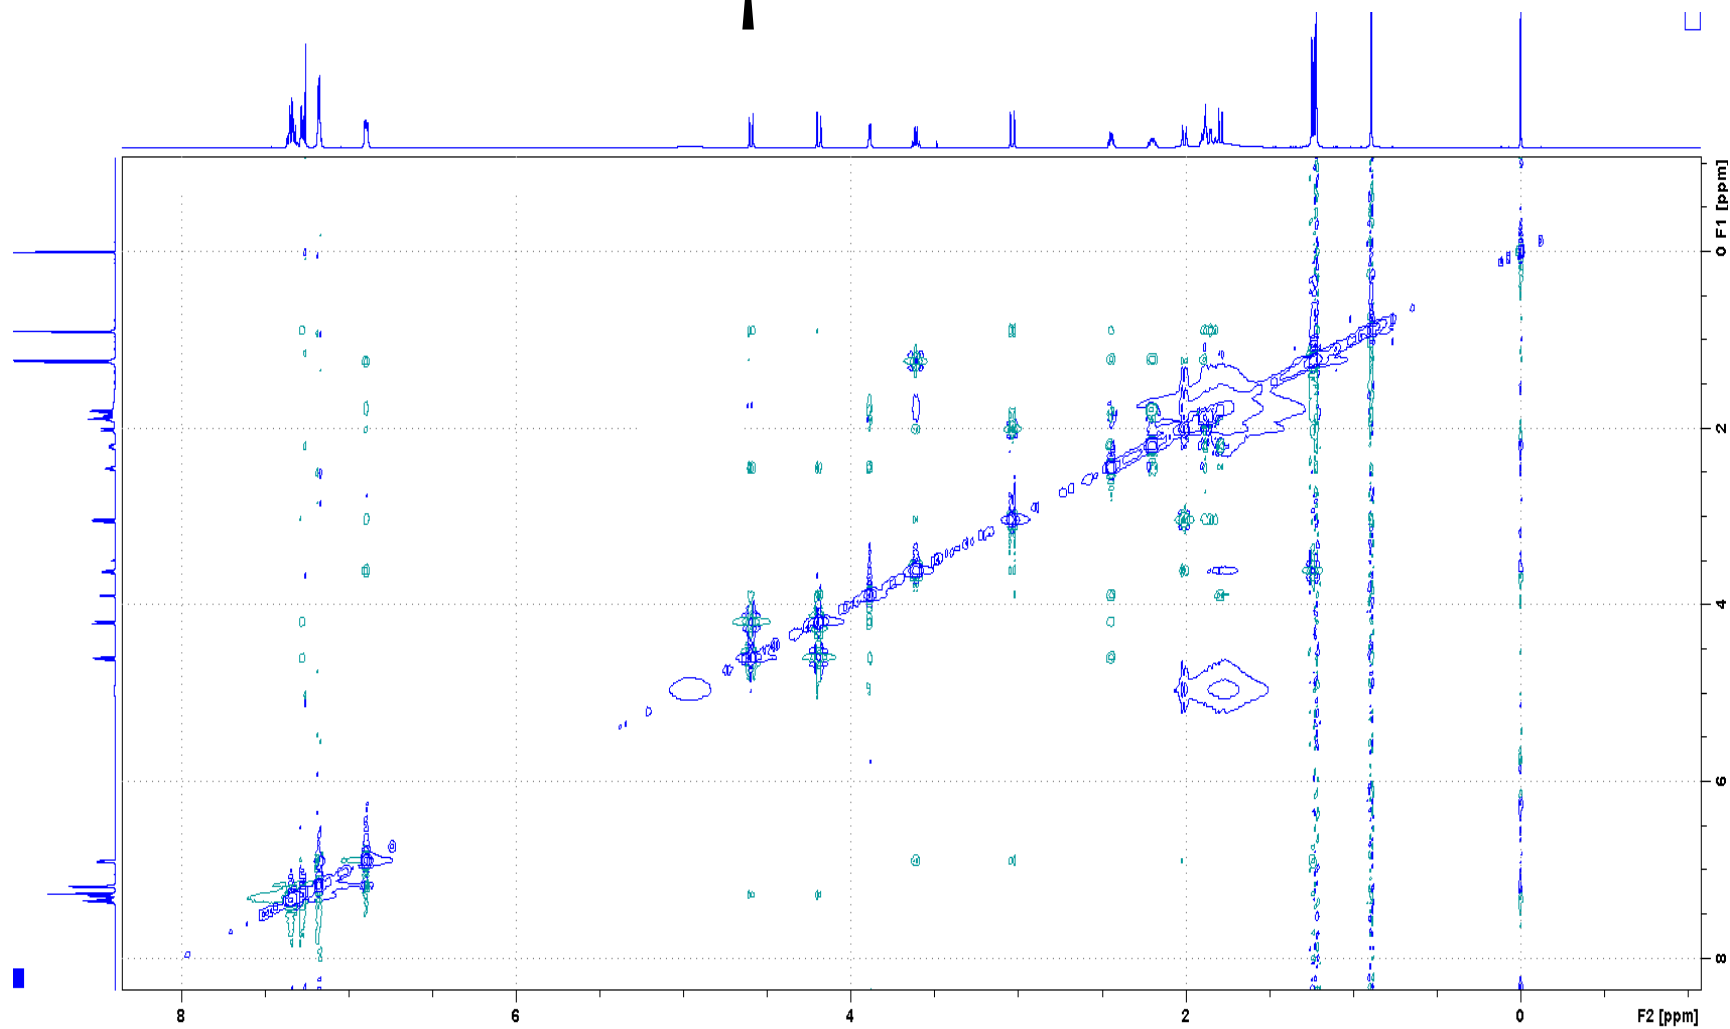

<sup>1</sup>H-NMR for compound **21**

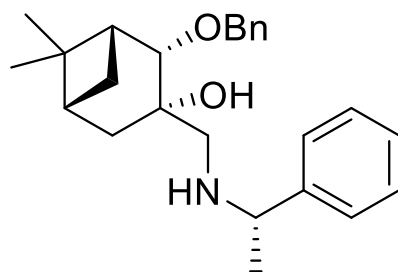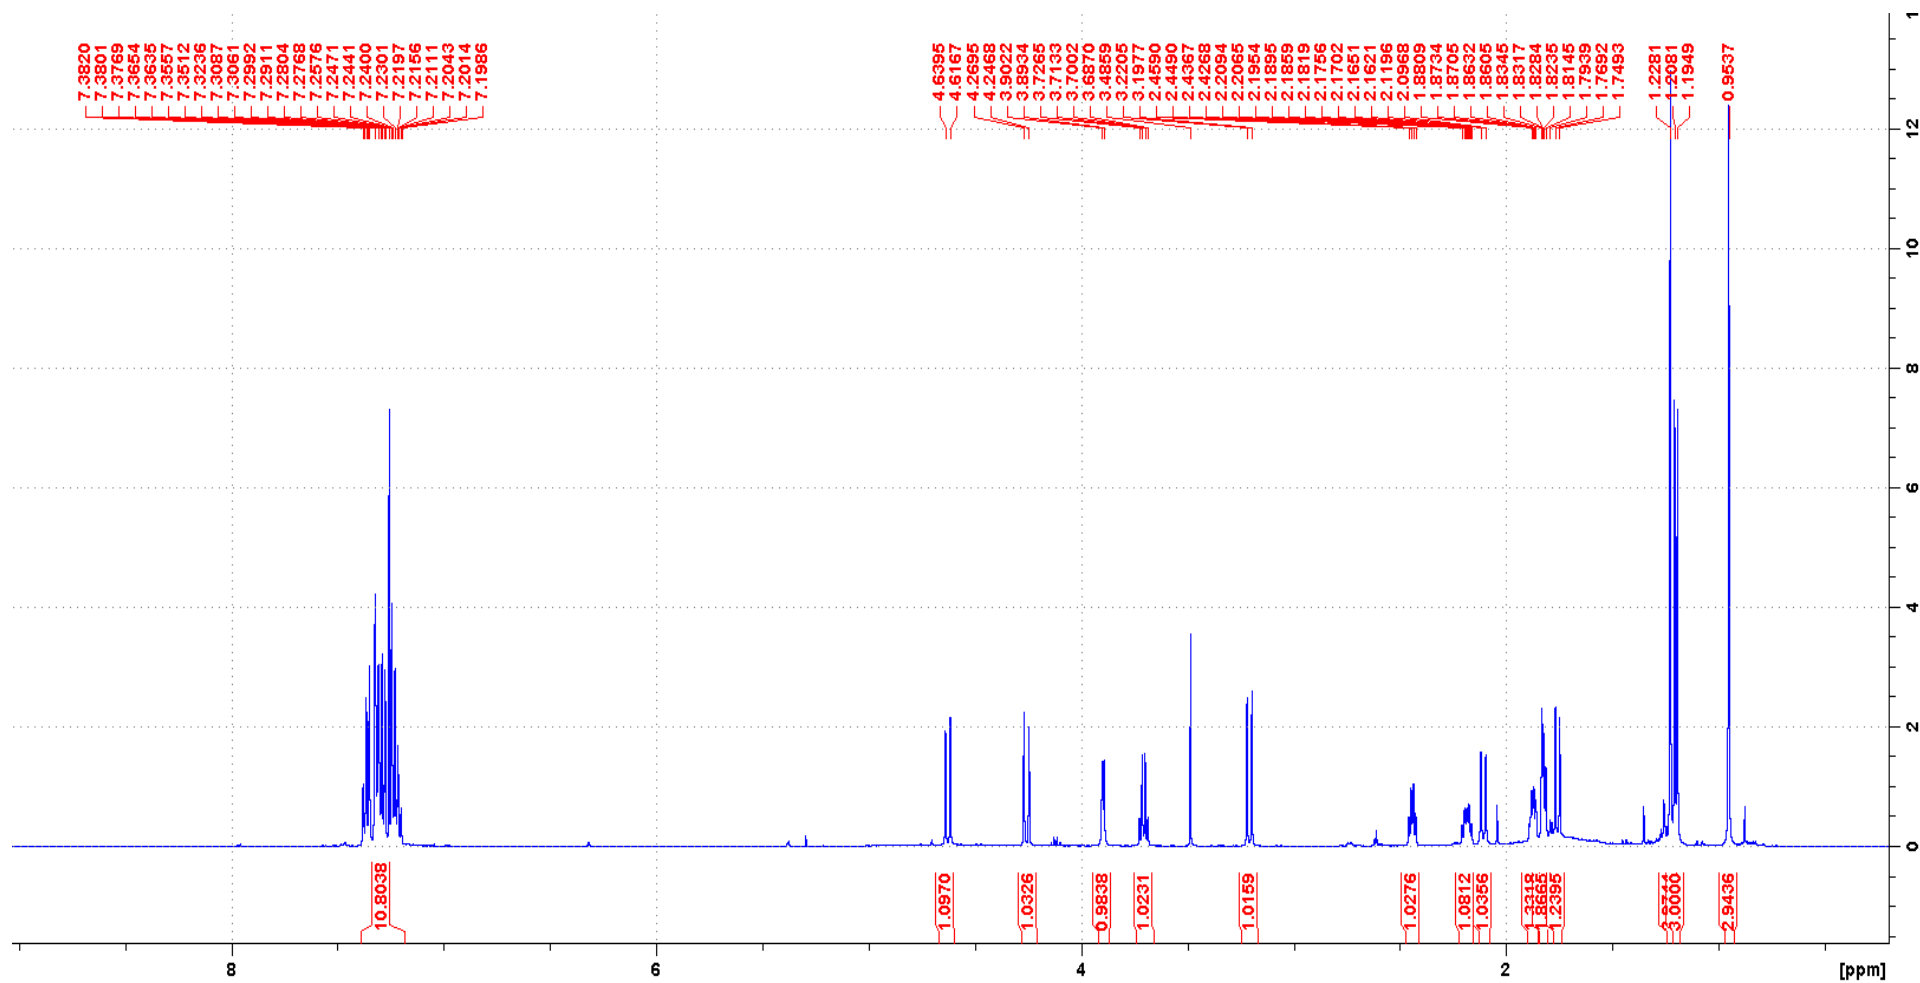

$^{13}\text{C}$ -NMR for compound **21**

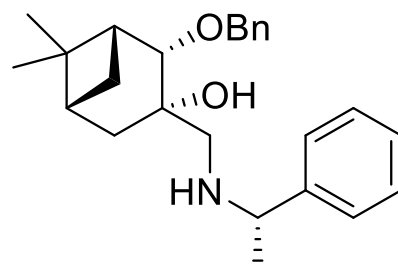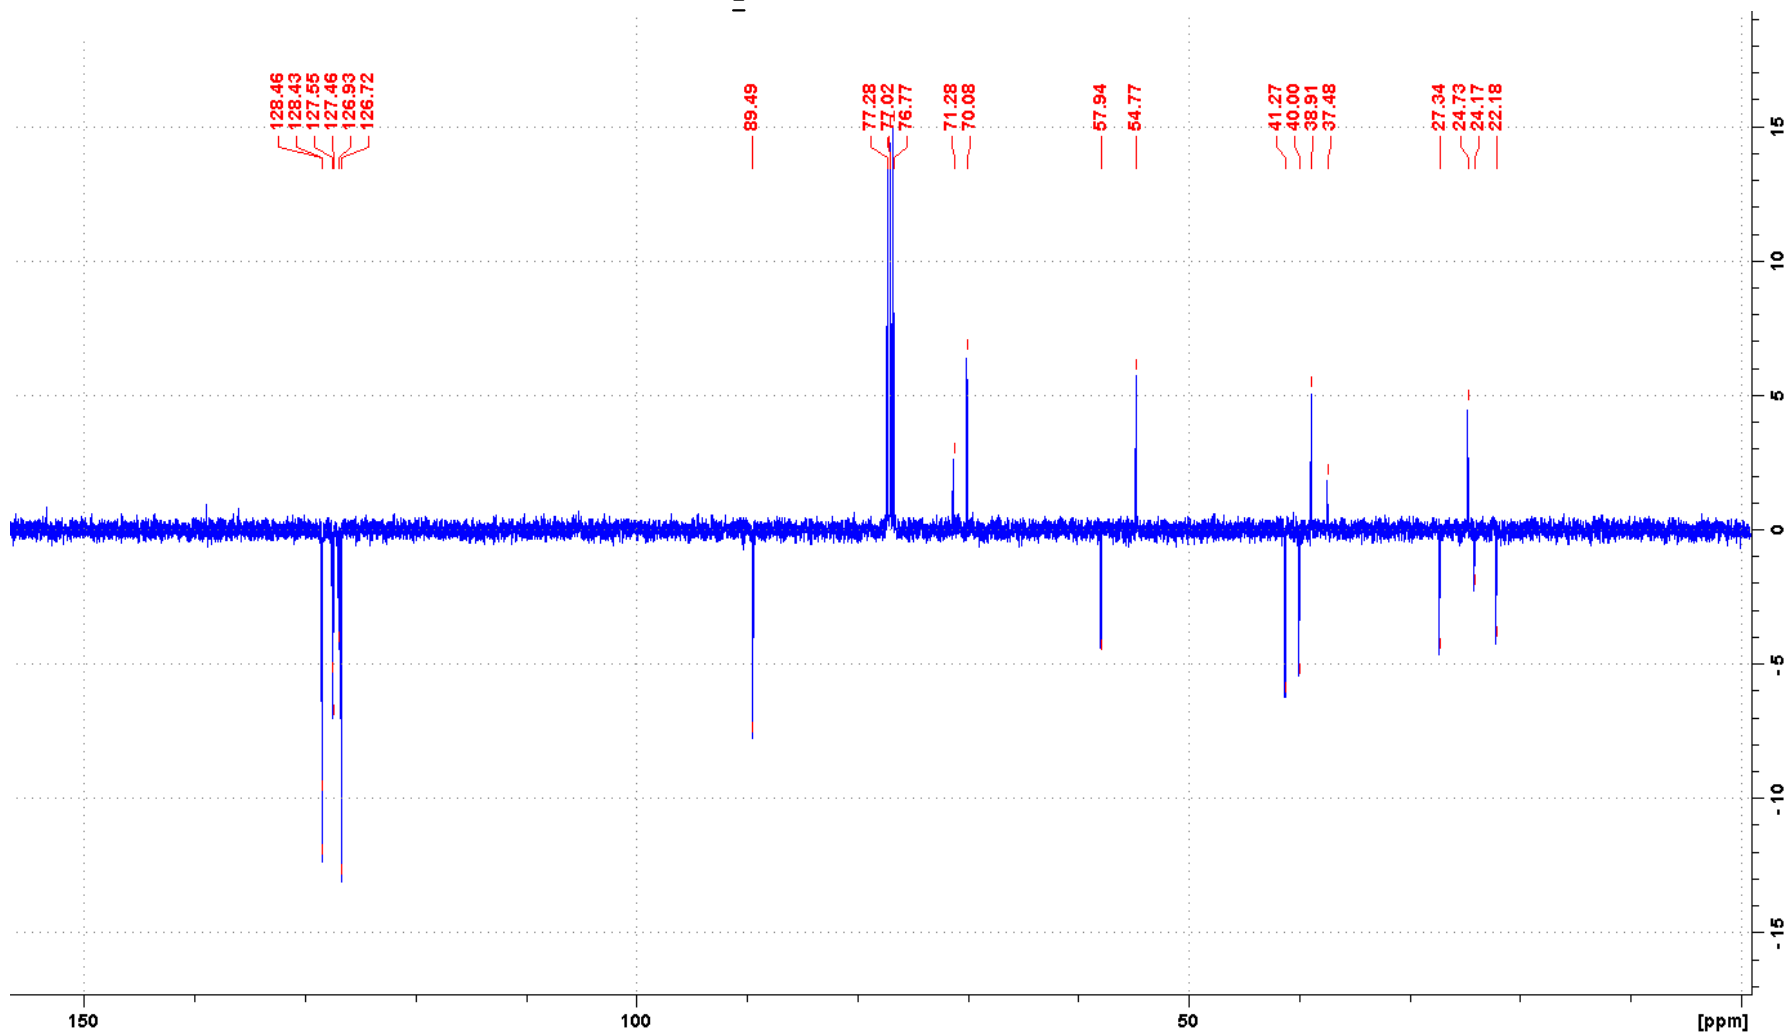

HSQC for compound **21**

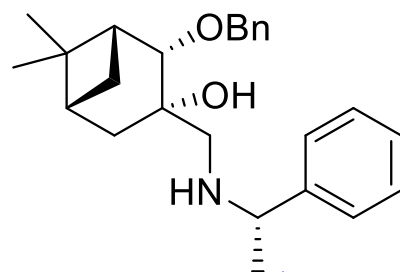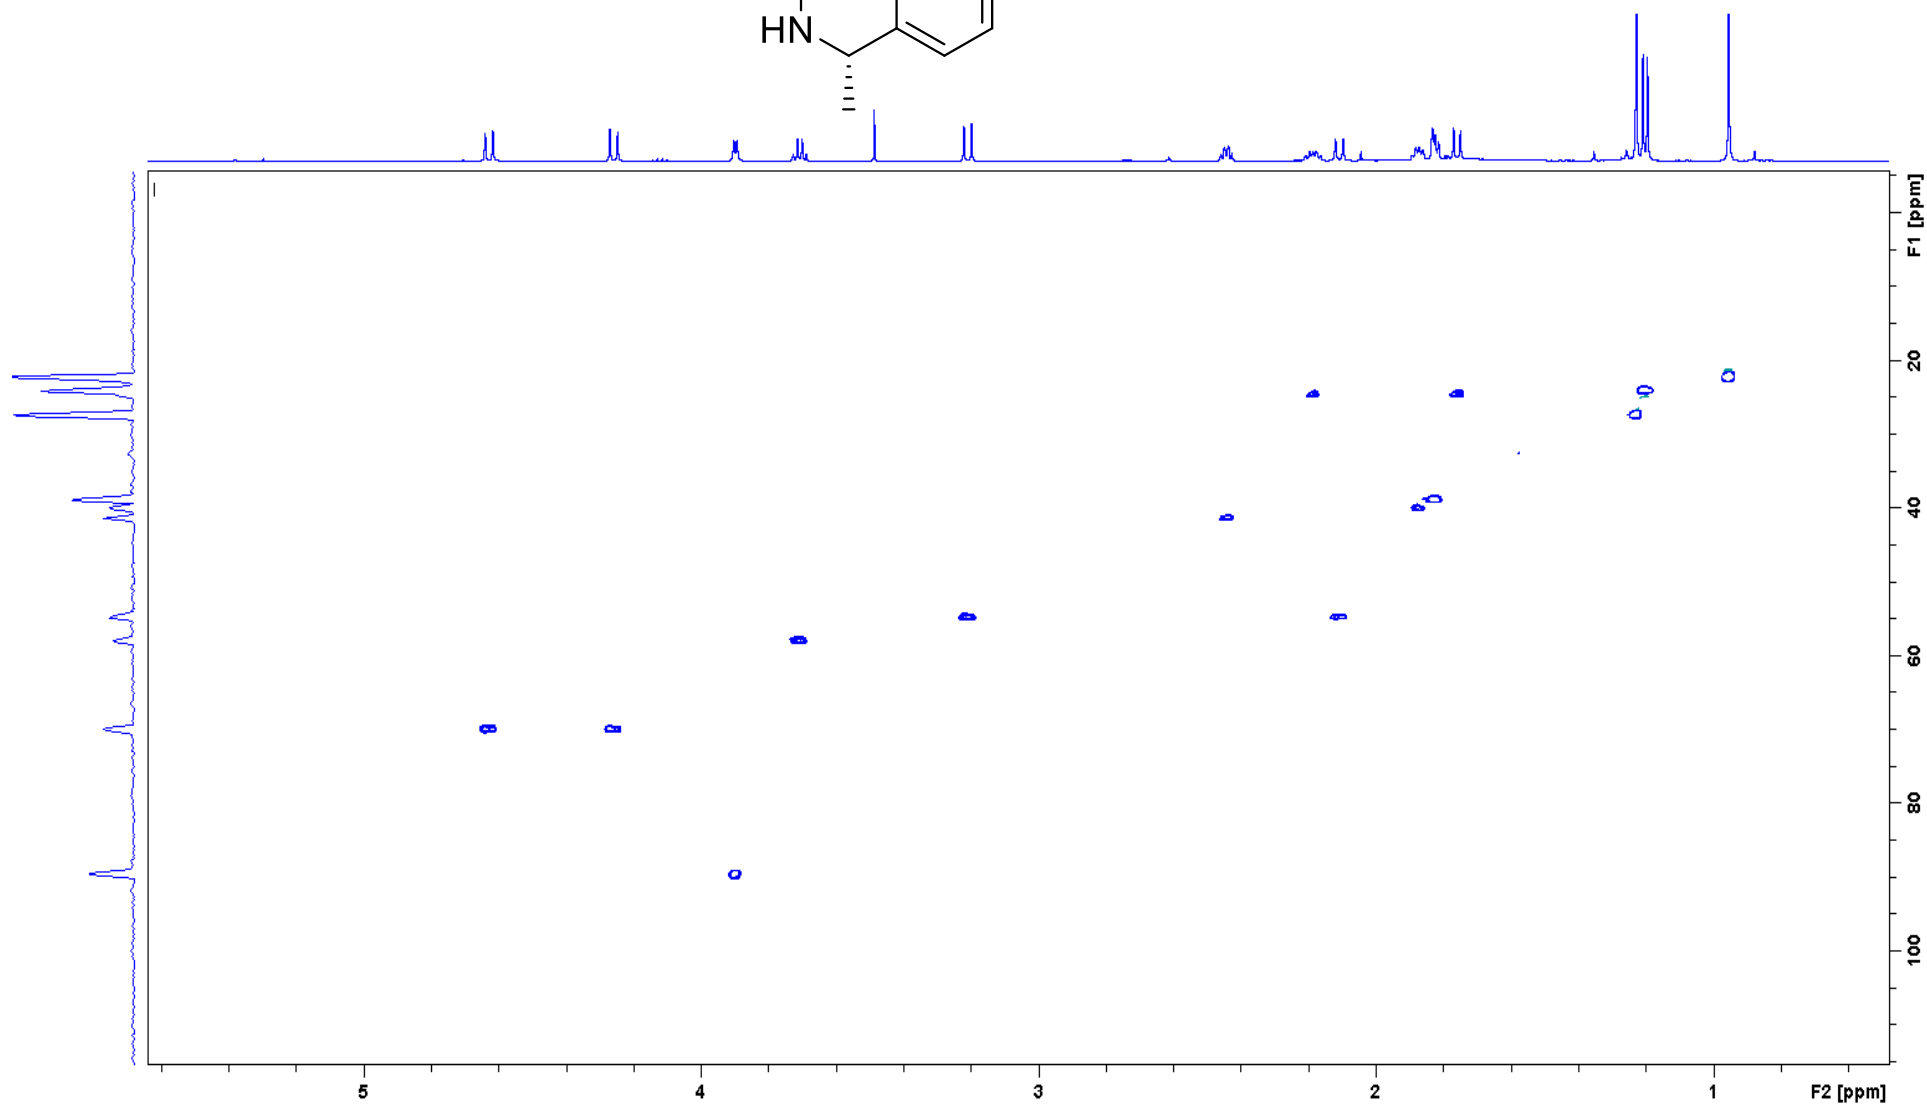



HMBC for compound **21**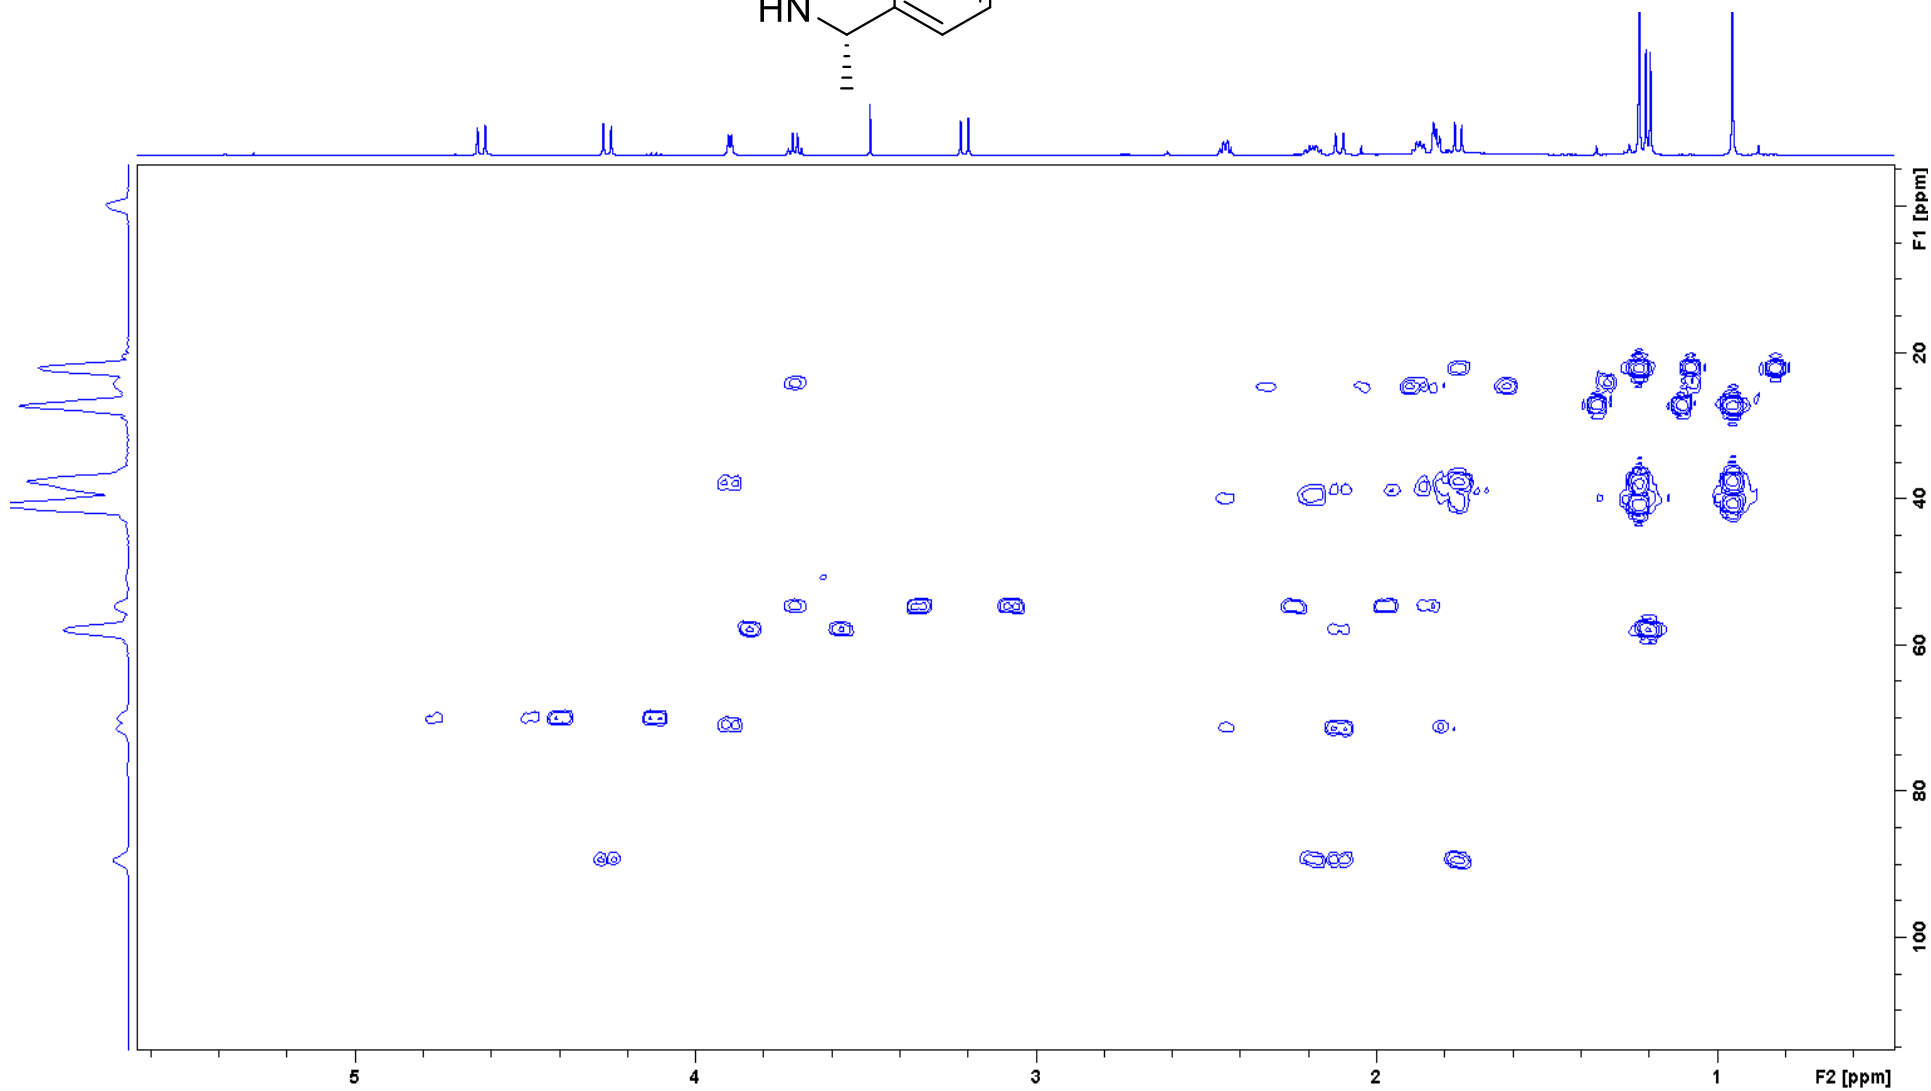

COSY for compound **21**

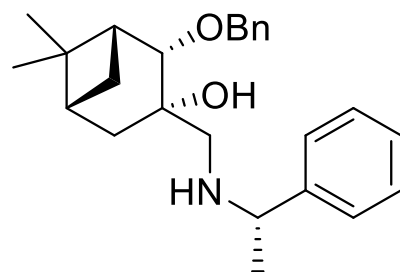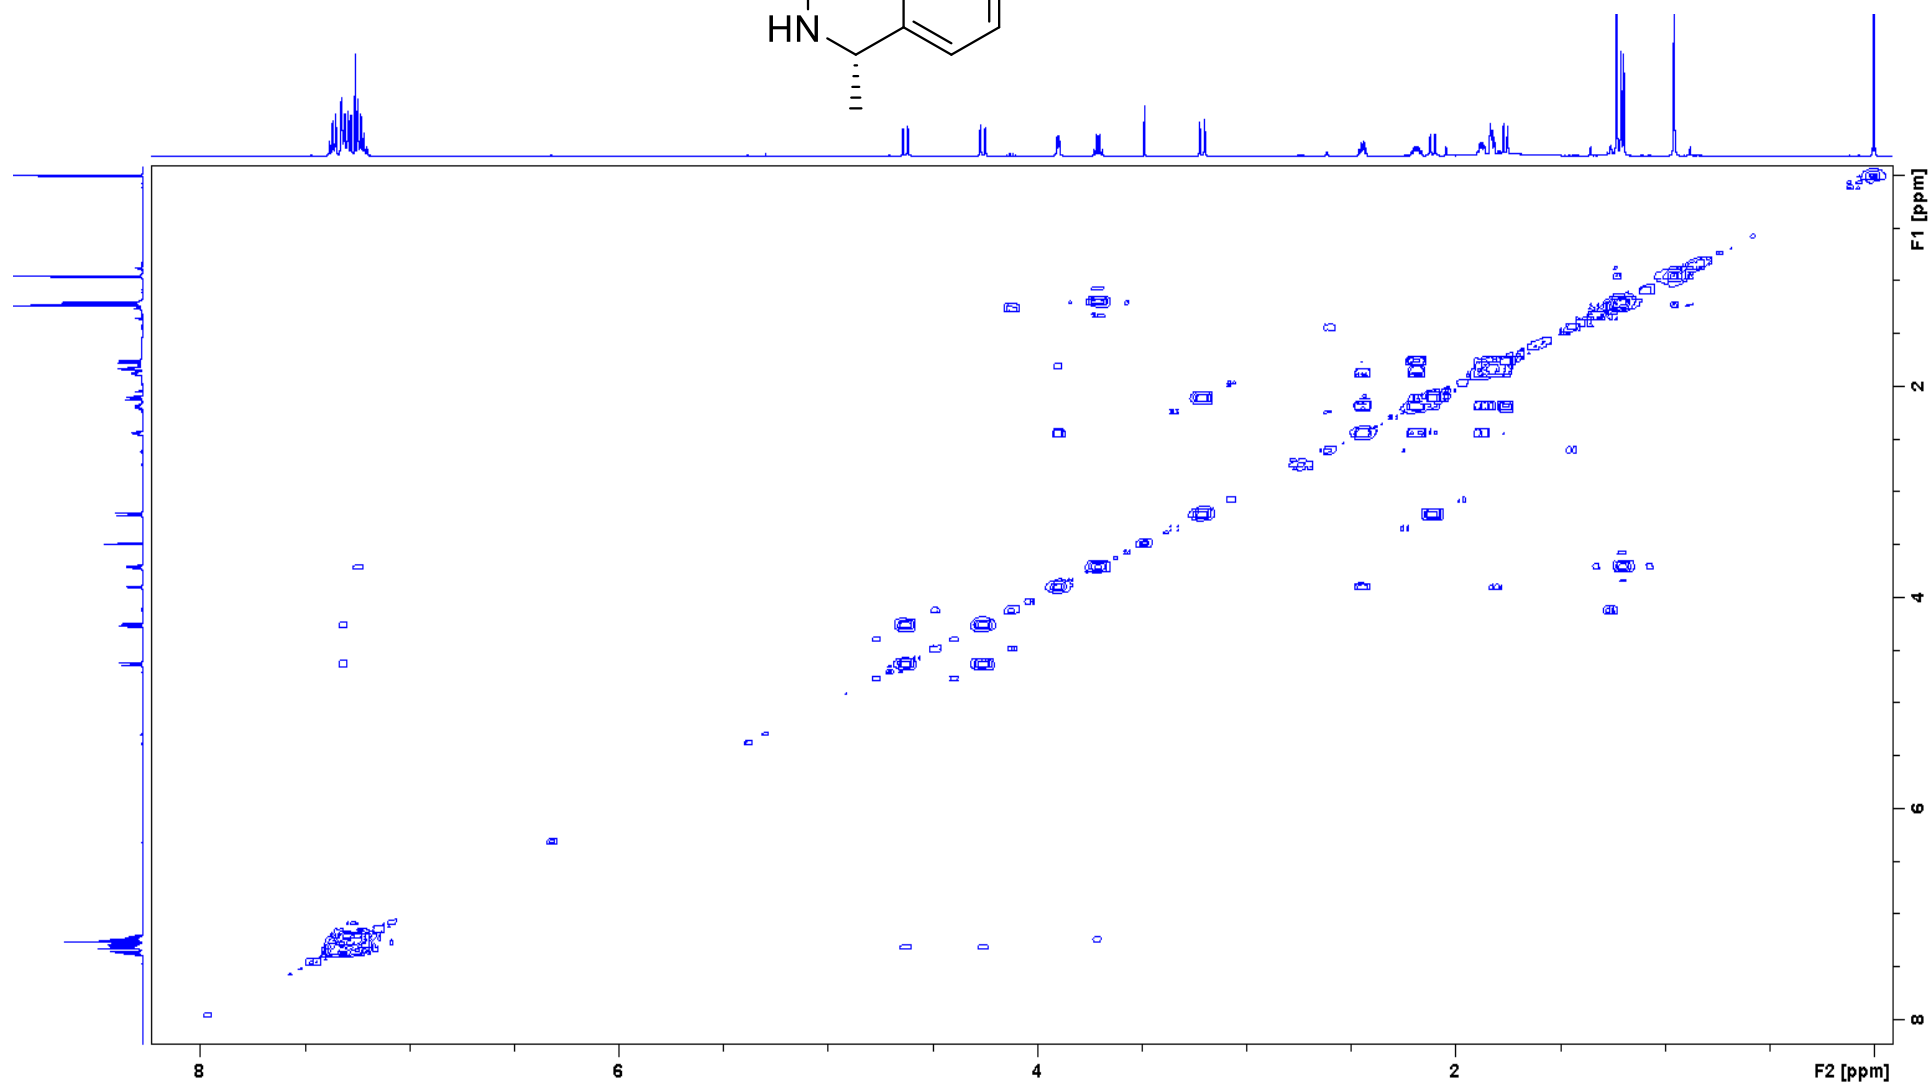

NOESY for compound **21**

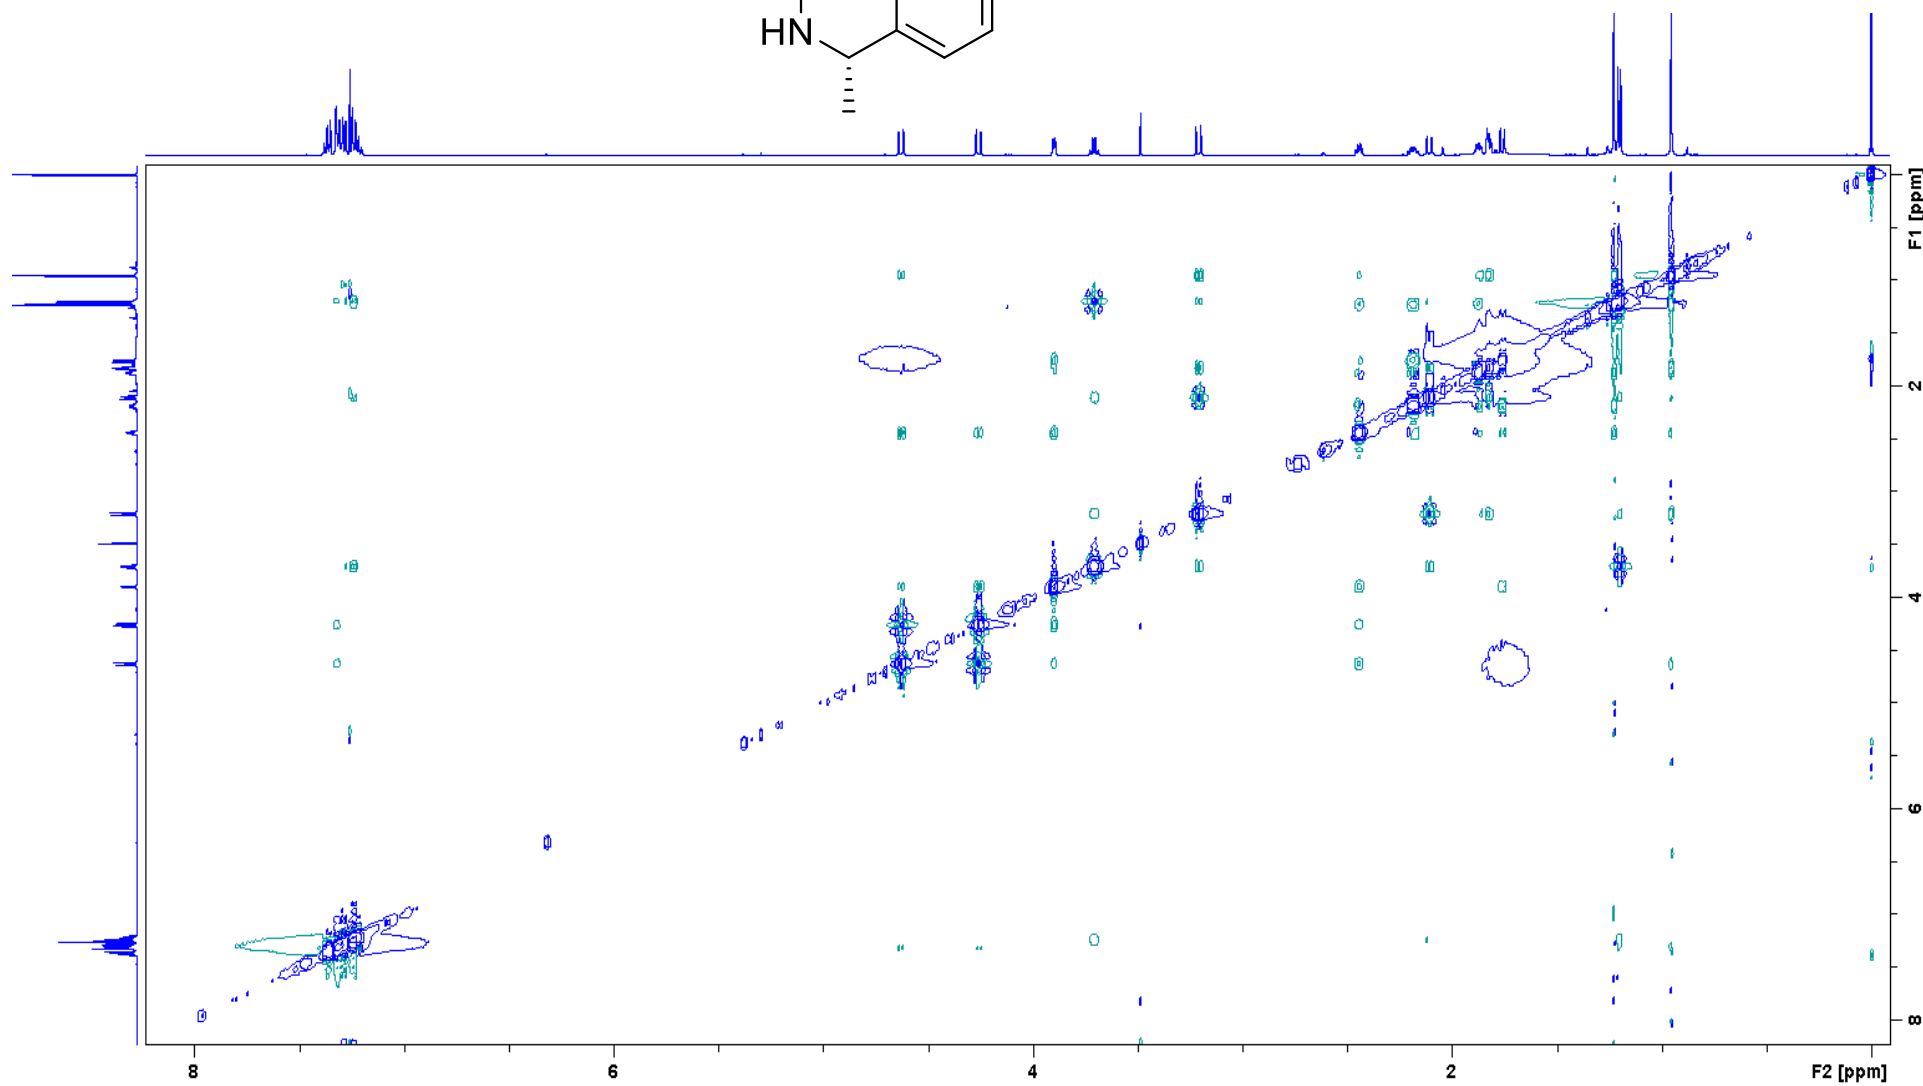

<sup>1</sup>H-NMR for compound **22**

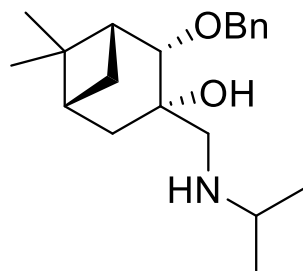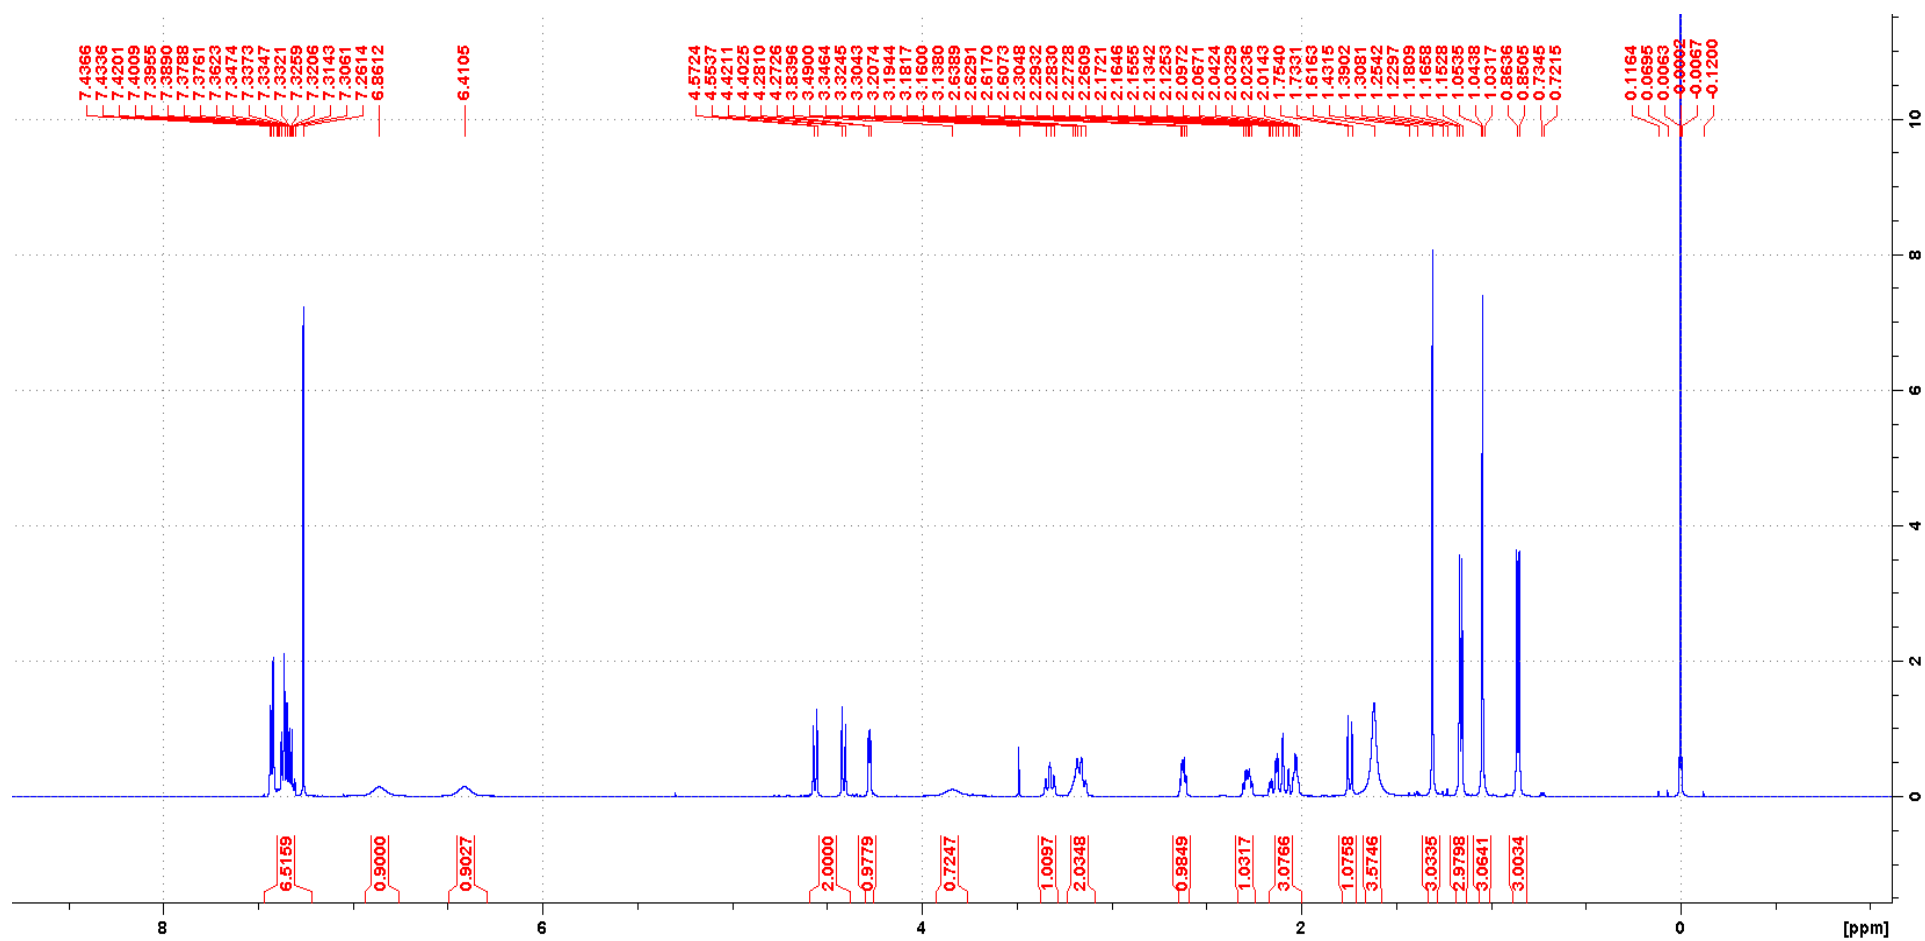

$^{13}\text{C}$ -NMR for compound **22**

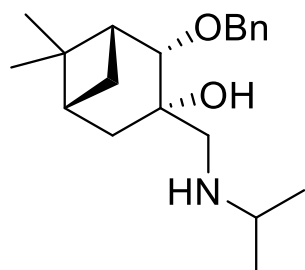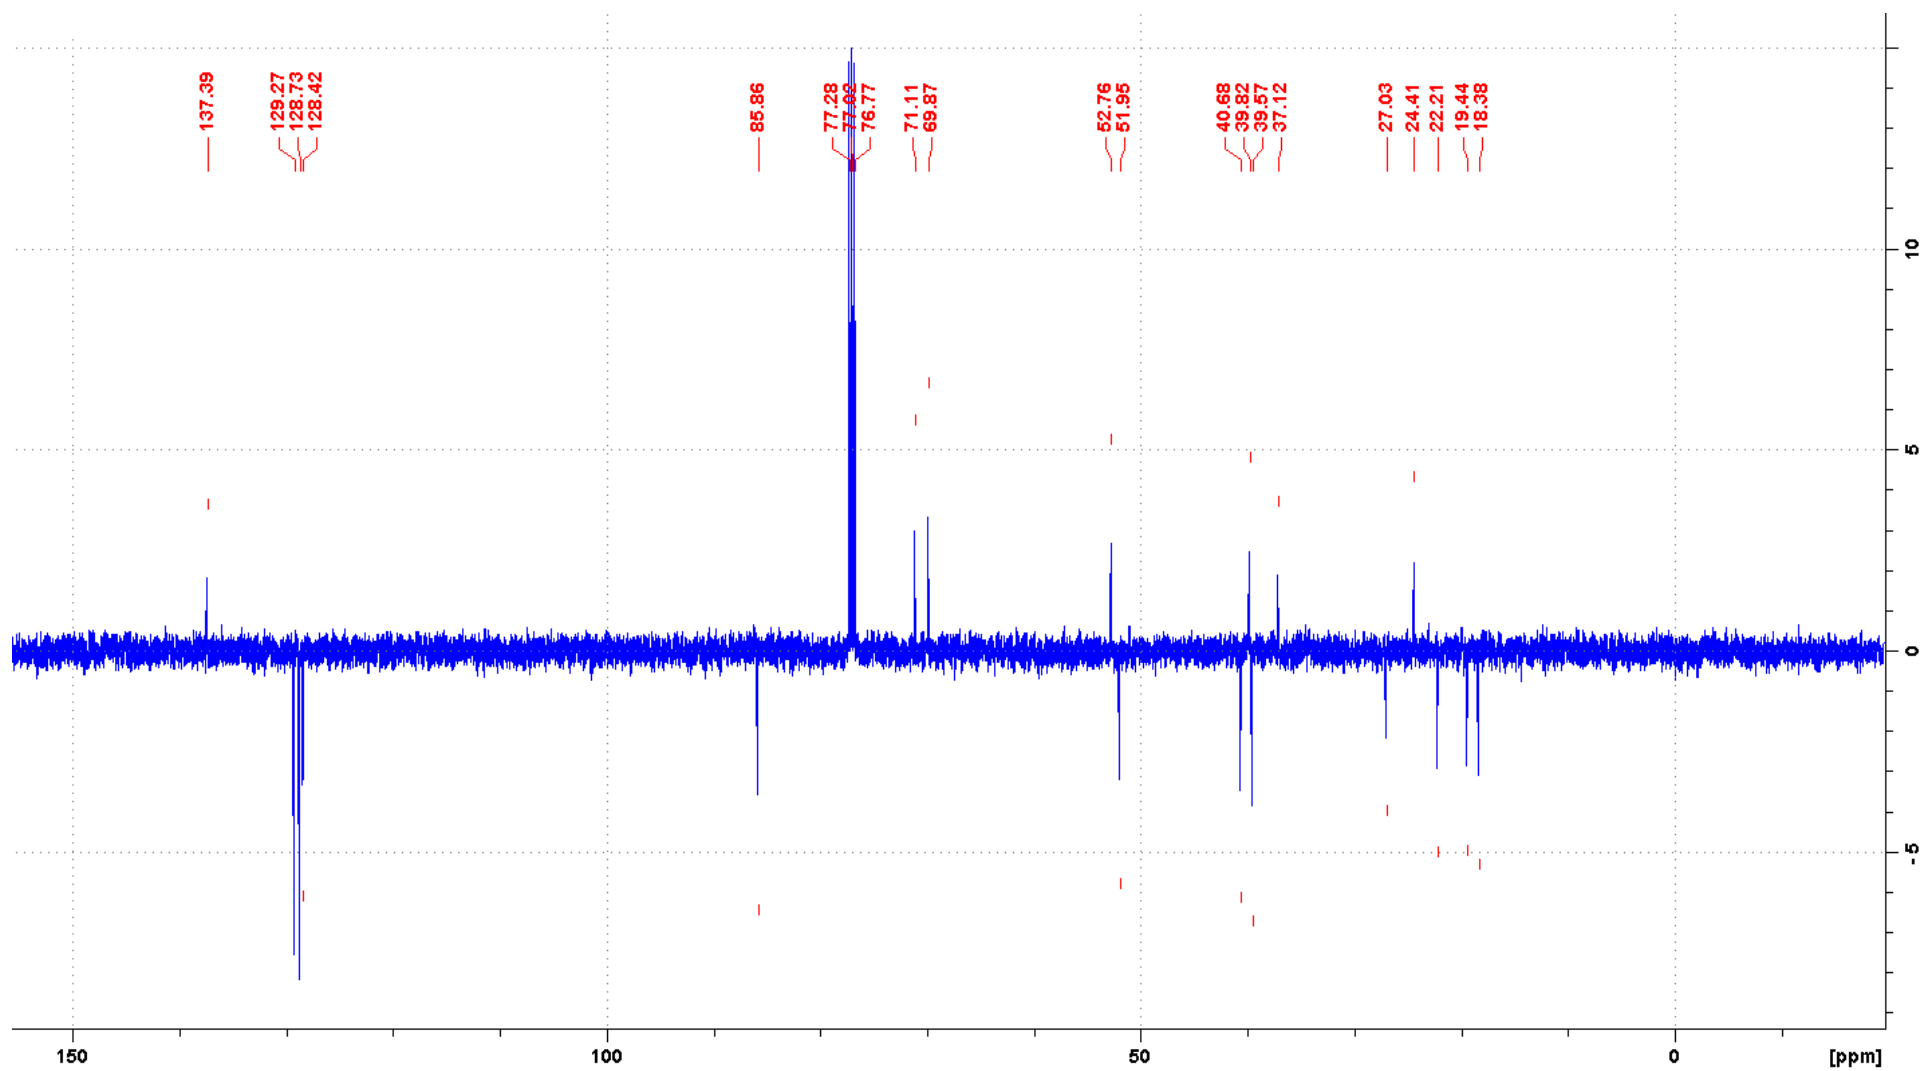

<sup>1</sup>H-NMR for compound **23**

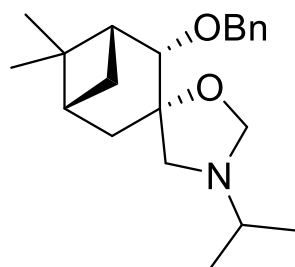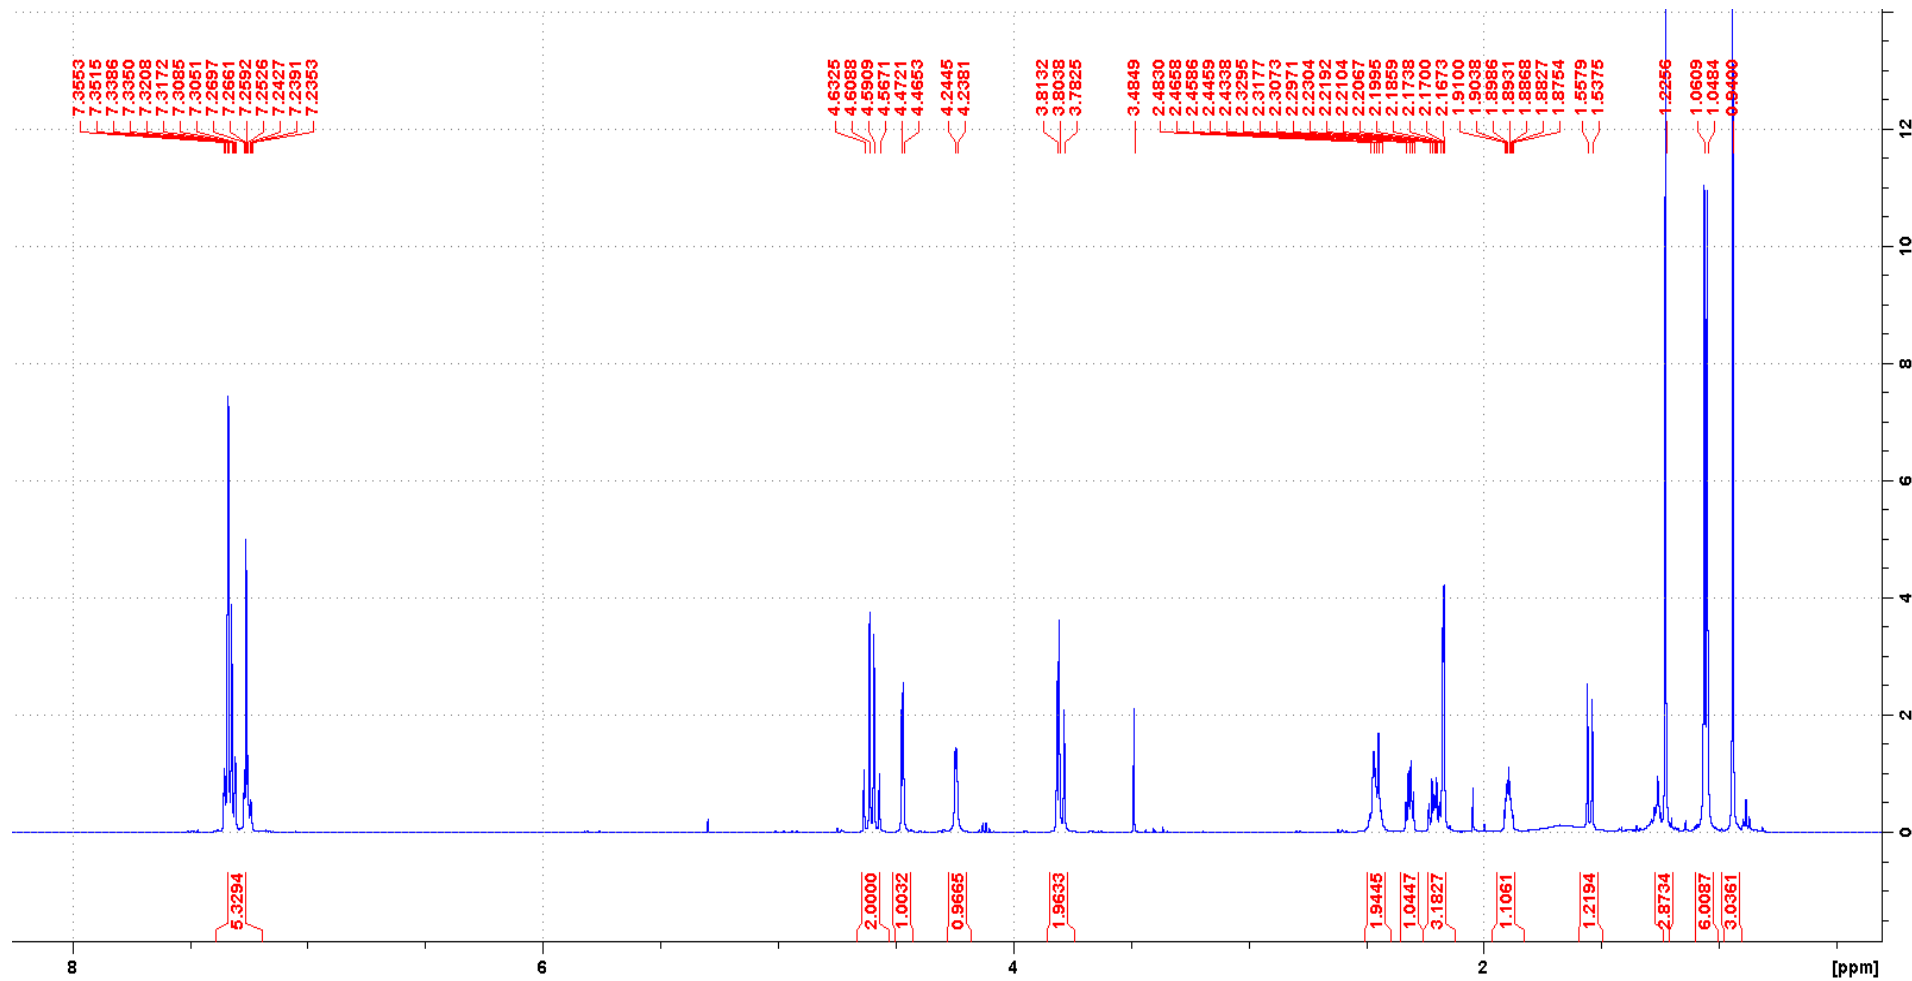

$^{13}\text{C}$ -NMR for compound **23**

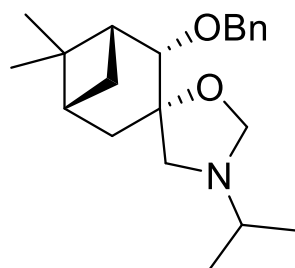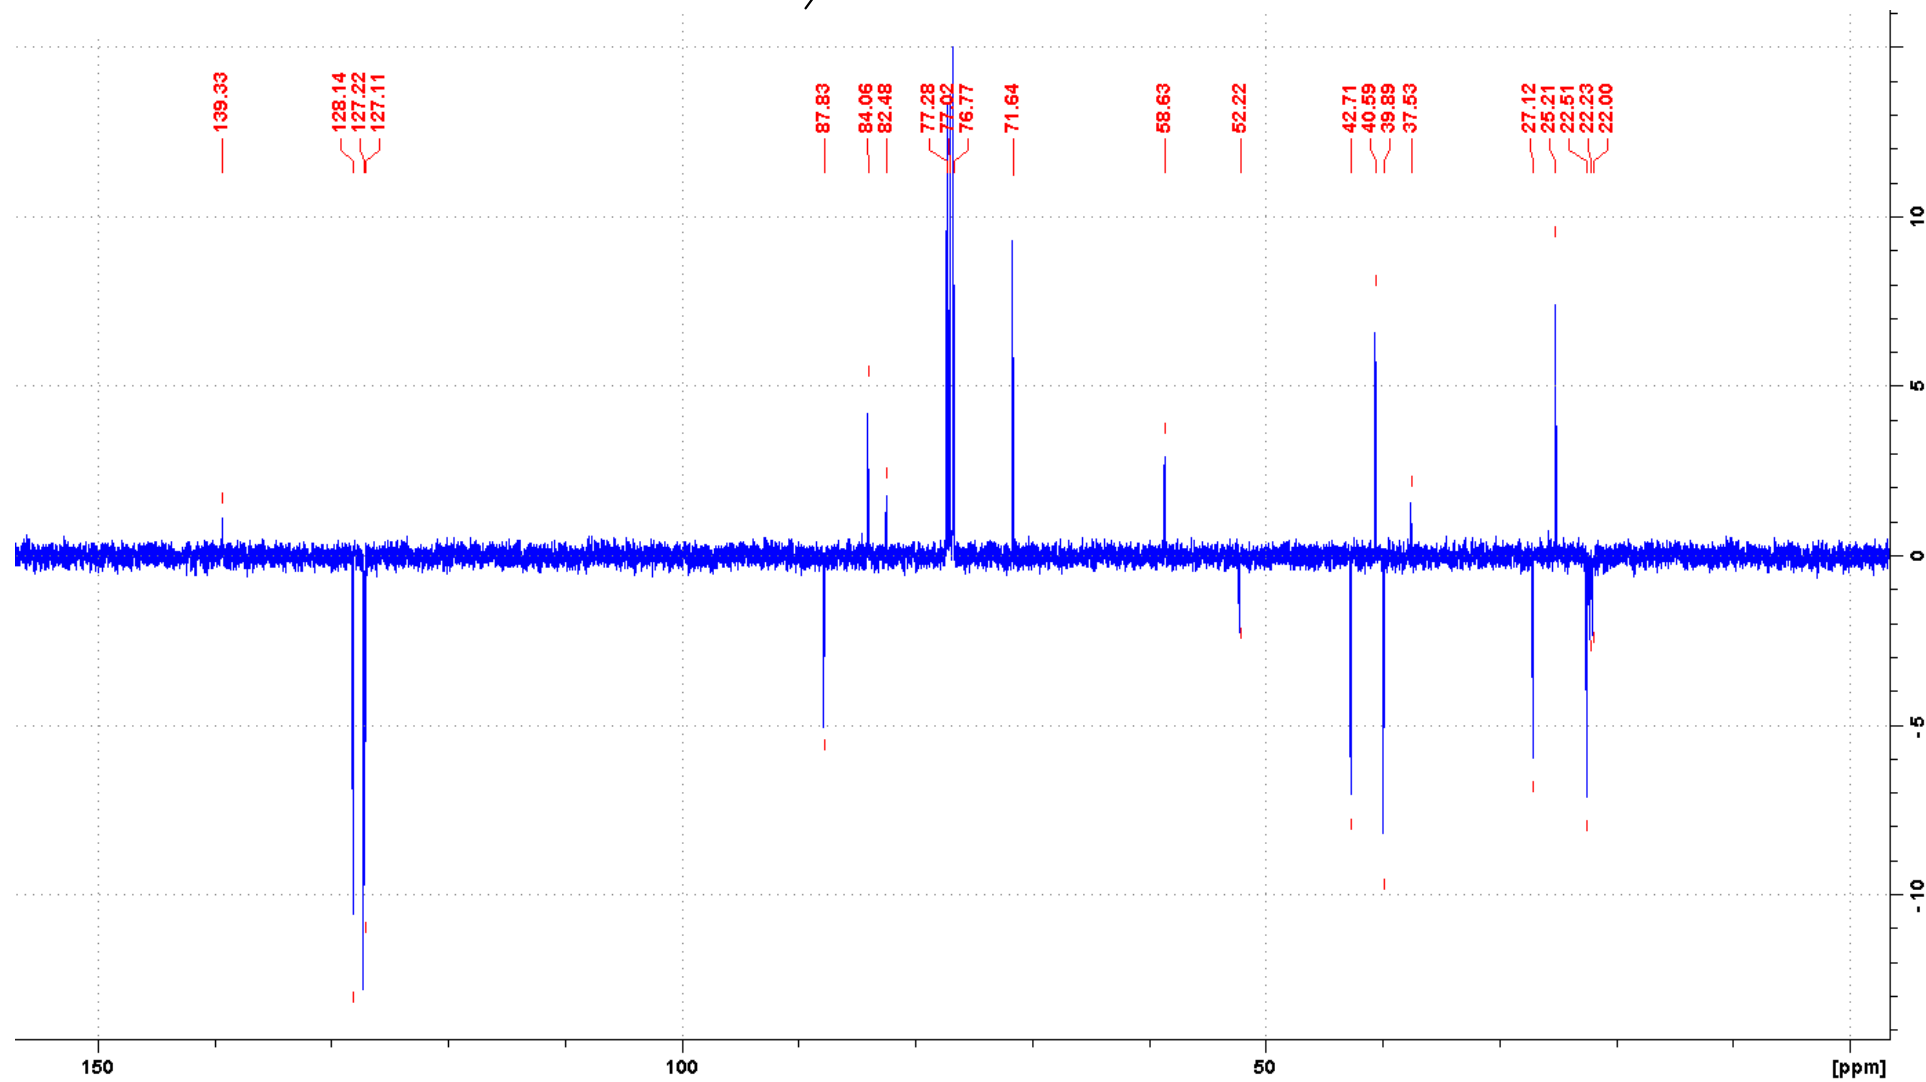

HSQC for compound **23**

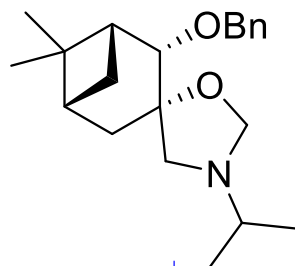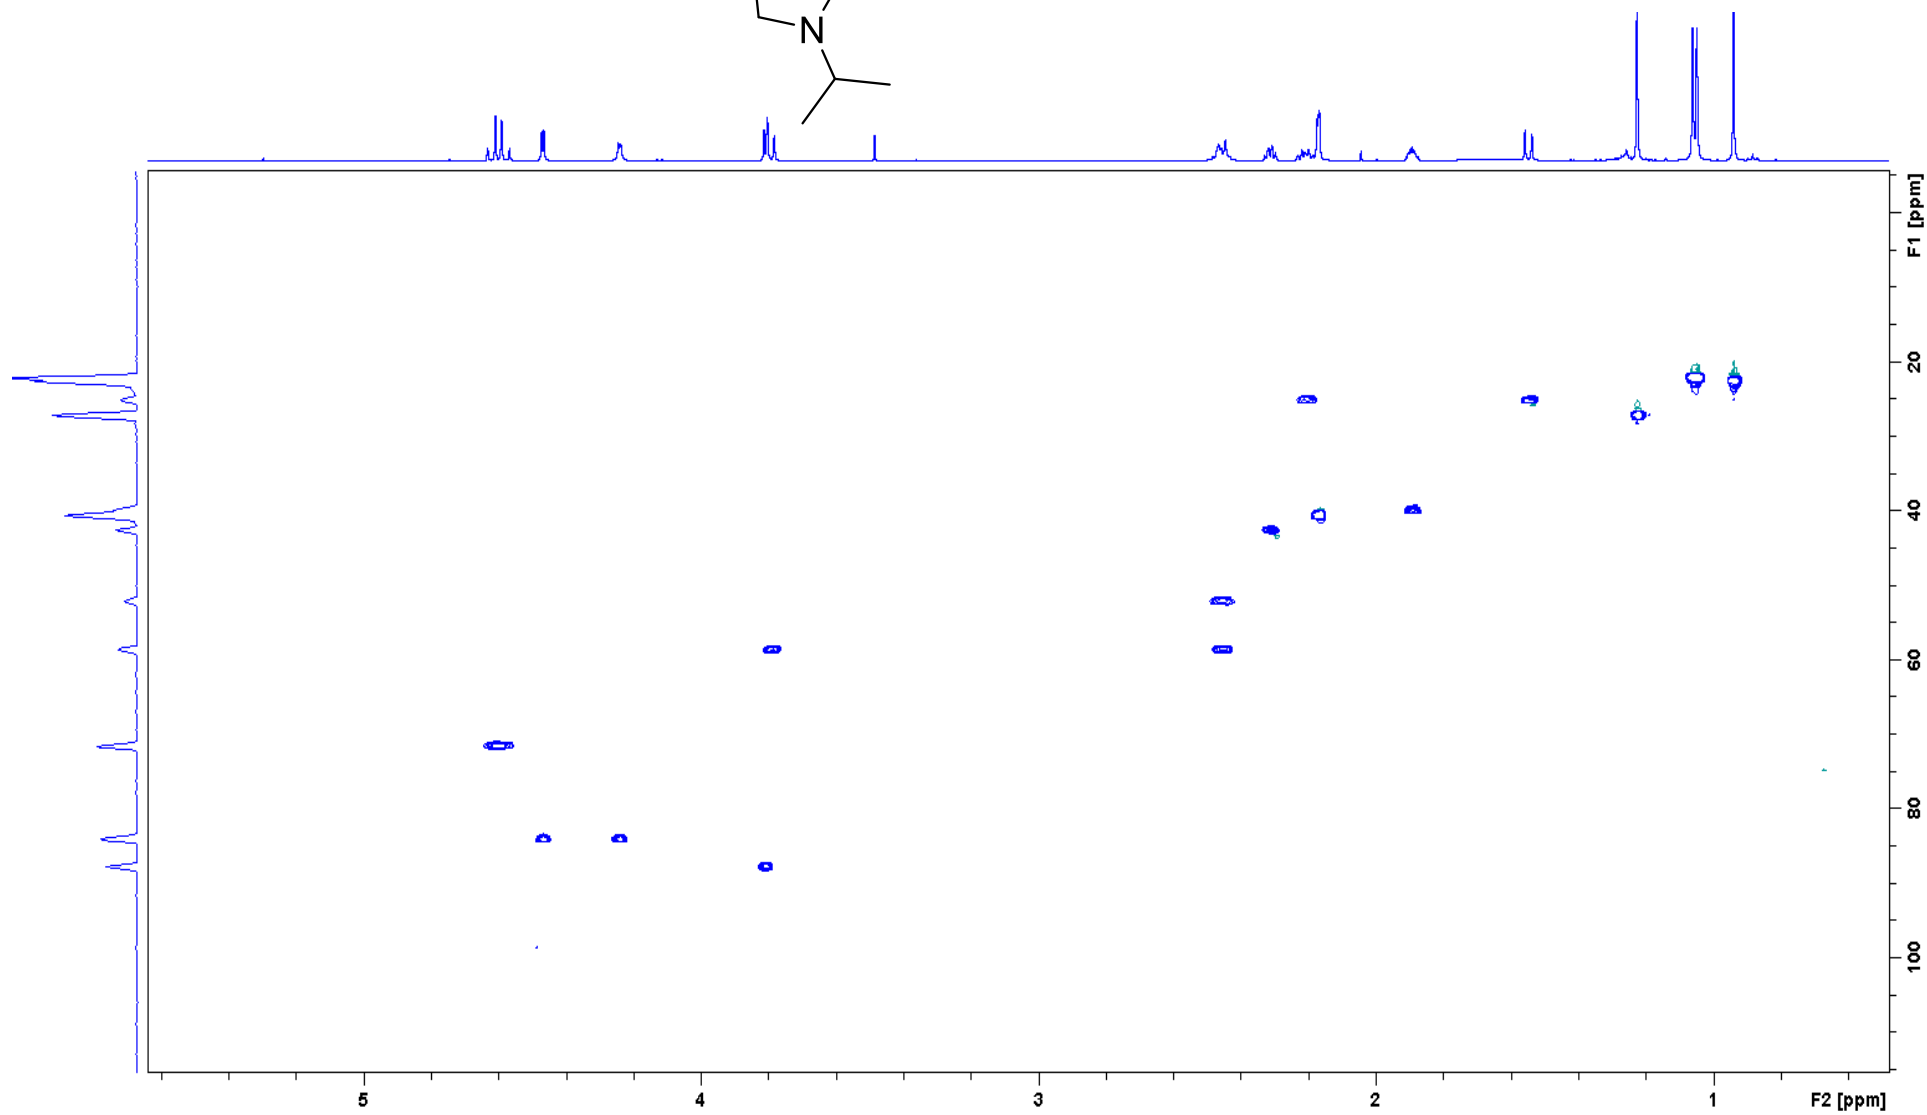



HMBC for compound **23**

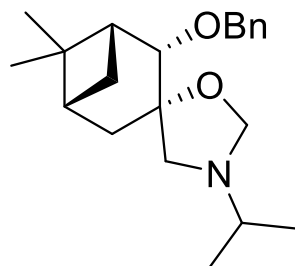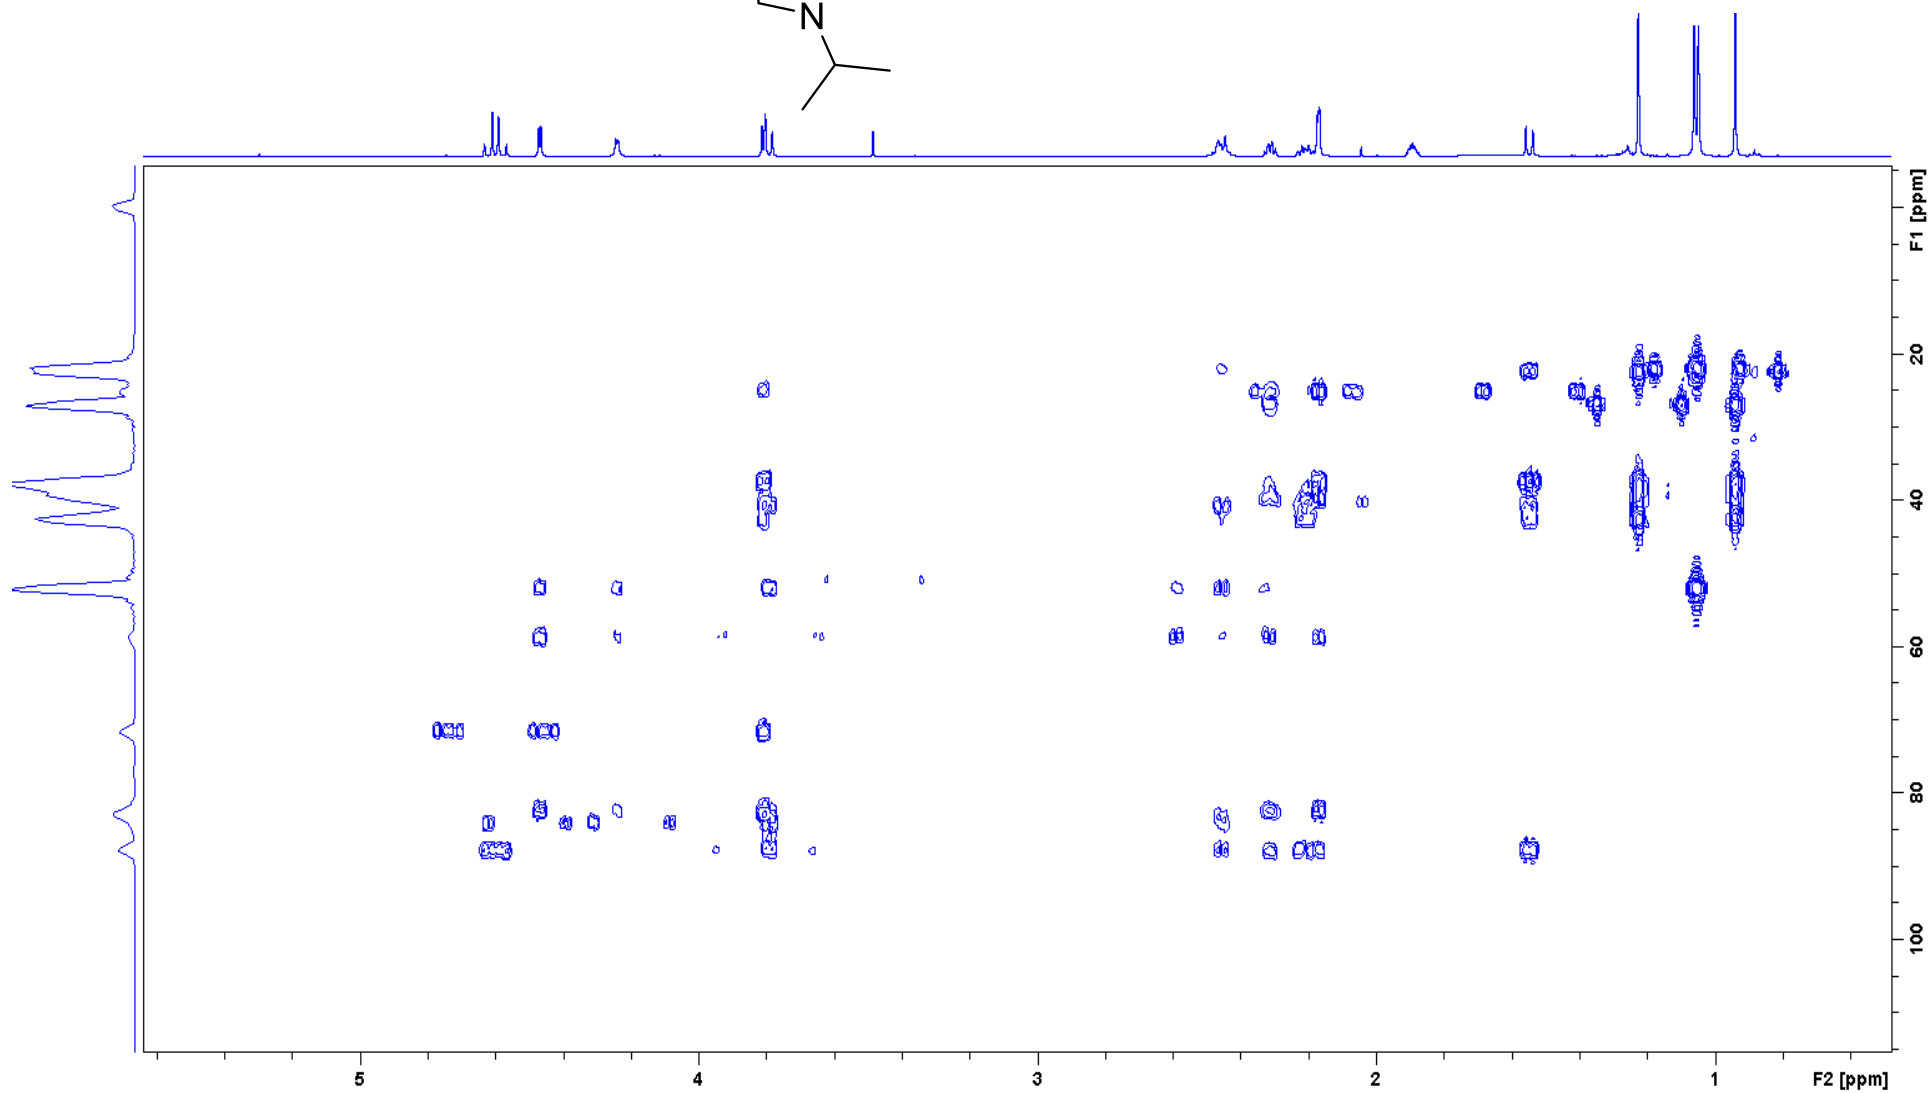

COSY for compound **23**

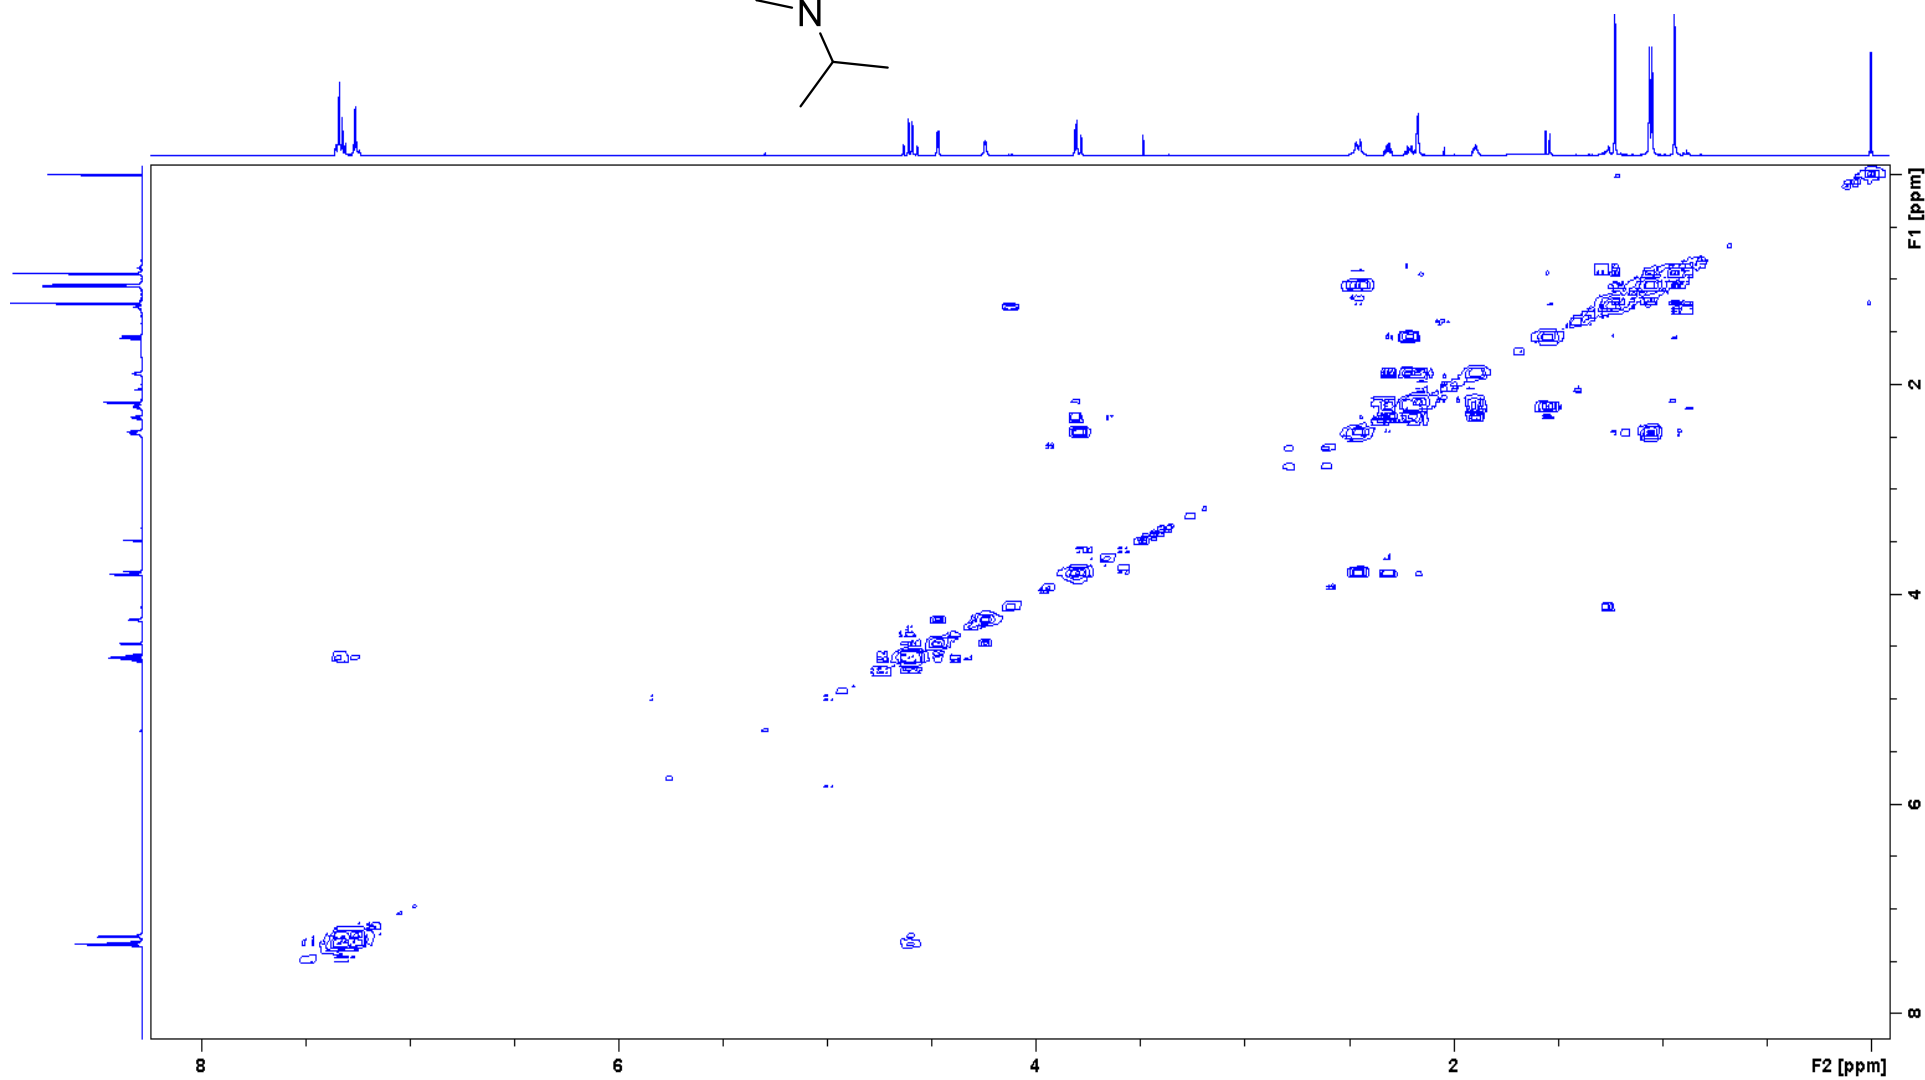

NOESY for compound **23**

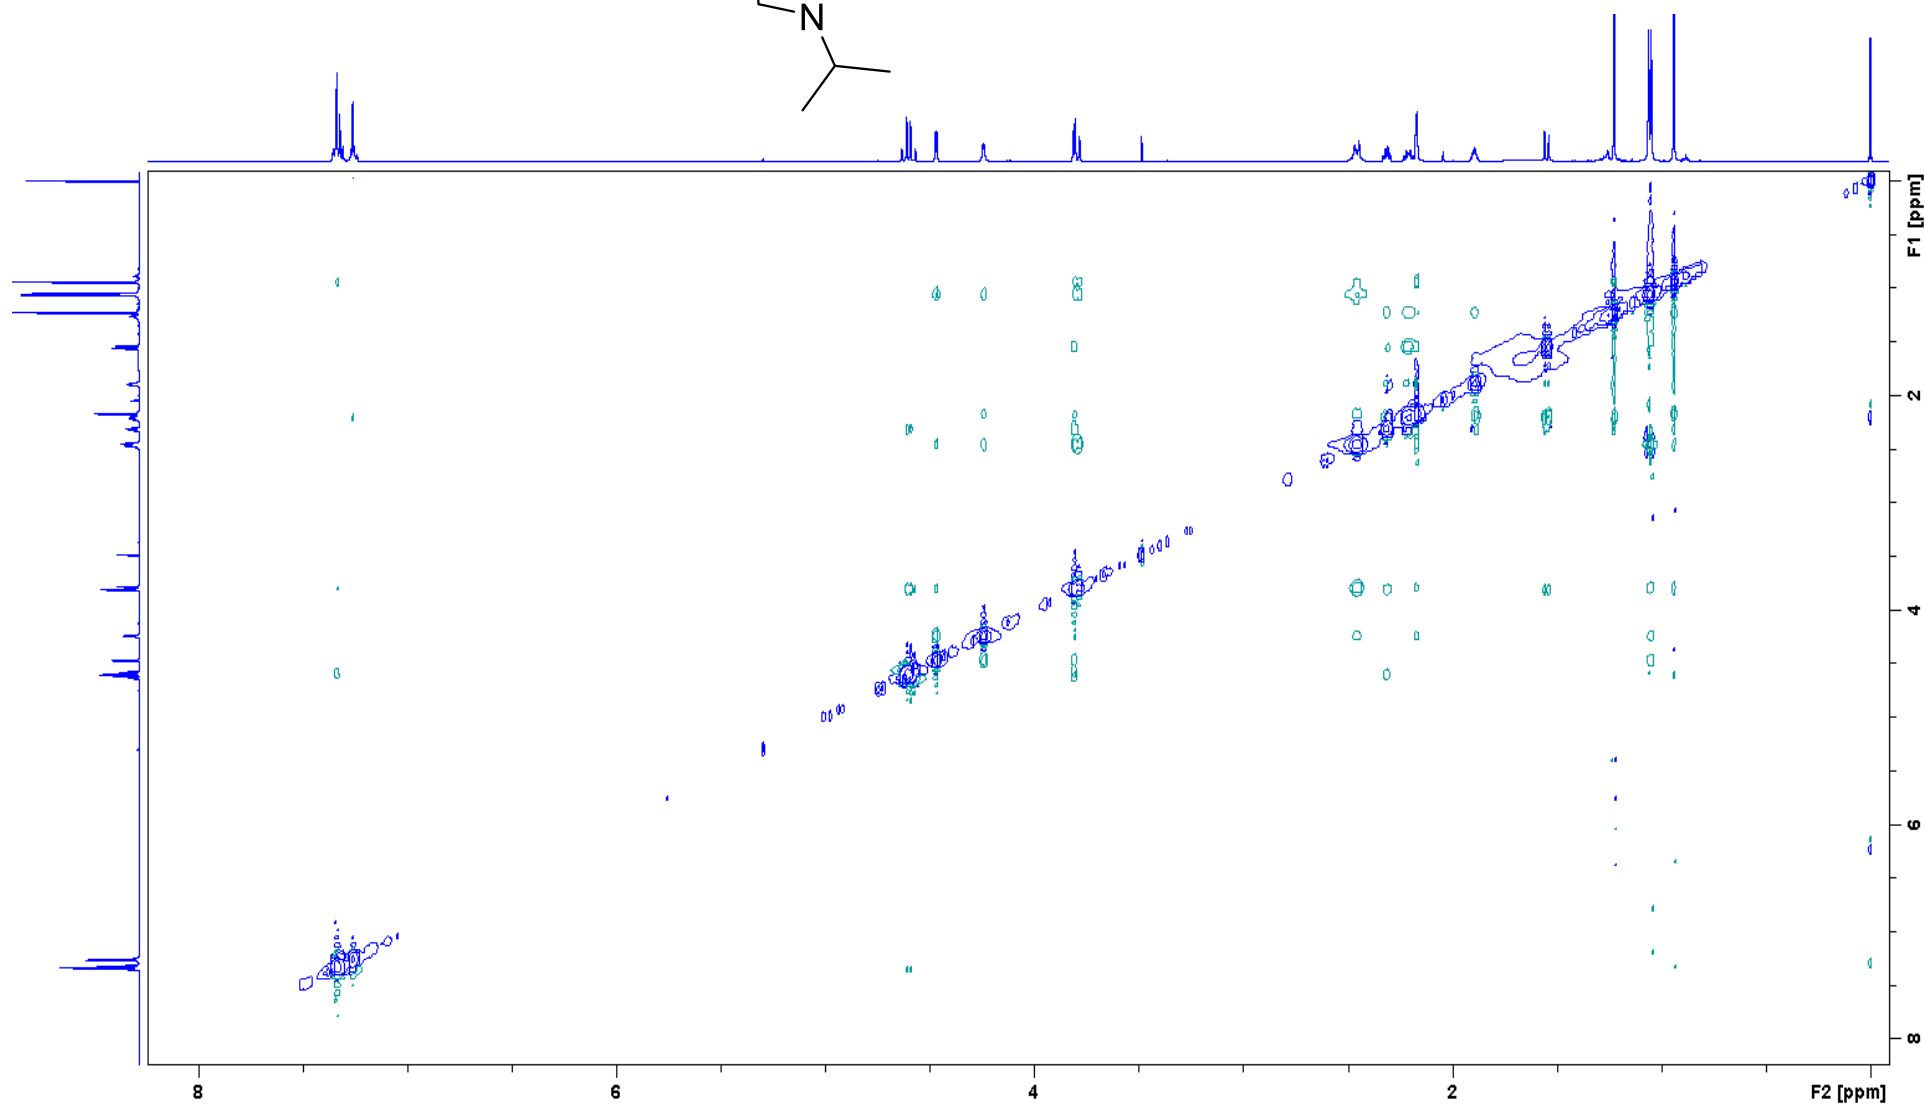

Supplement: s1 [file s1]
